# Supplementary material
Source: PubMed Central journal article supplement (PMC5505324)
Supplement: NIHMS870570-supplement-Supp_Table_S2.pdf [file NIHMS870570-supplement-Supp_Table_S2.pdf]

Table with columns A through AE and rows for genes 1 to 1000. Each row represents a gene with its accession number, amino acid change, and various classification and mutation metrics across different databases and methods. The table is a dense grid of numerical and categorical data points for each gene.







| A | B     | C                 | D            | E                     | F                | G                                  | H                                                                                | I        | J                                               | K     | L                 | M               | N               | O       | P    | Q      | R                    | S                    | T    | U         | V         | W             | X   | Y | Z      | AA | AB    | AC | AD    | AE |
|---|-------|-------------------|--------------|-----------------------|------------------|------------------------------------|----------------------------------------------------------------------------------|----------|-------------------------------------------------|-------|-------------------|-----------------|-----------------|---------|------|--------|----------------------|----------------------|------|-----------|-----------|---------------|-----|---|--------|----|-------|----|-------|----|
| 1 | Gene  | Amino Acid Change | Allele Count | Number of Homozygotes | Allele Frequency | Literature report of status (1-16) | ACMG class (0-Benign/Likely Benign; 1- Pathogenic; 2- VUS; 4- Likely Pathogenic) | Location | PolyPhen                                        |       | FATHMM Unweighted | FATHMM weighted | FATHMM weighted | PROVEAN | SIFT | Condel | Mutation Assessor v3 | Mutation Assessor v4 | MCAP | SCN Index | SCN Index | SCN Phenotype |     |   |        |    |       |    |       |    |
|   |       |                   |              |                       |                  |                                    |                                                                                  |          | Prediction (1 -> disease; 0.5 -> 1.5; 4 -> 1.5) | Score |                   |                 |                 |         |      |        |                      |                      |      |           |           |               |     |   |        |    |       |    |       |    |
| 1 | SCN8A | P1797S            | 1            | 12008                 | 0                | 0.00000278                         |                                                                                  | 1        | C term                                          | 0.5   | 0                 | 0.84            | 0               | 2.52    | 1    | -4.19  | 1                    | 4.03                 | 1    | 0.019     | 1         | 0.632         | 0.5 | 0 | 2.57   | 1  | 0.518 | 1  | 0.818 |    |
| 1 | SCN8A | R1828I            | 1            | 12012                 | 0                | 0.00000277                         |                                                                                  | 1        | C term                                          | 0.5   | 0                 | 0.96            | 0               | 2.11    | 1    | -4.16  | 1                    | 3.1                  | 1    | 0.001     | 1         | 0.629         | 1   | 1 | 3.69   | 1  | 0.807 | 1  | 0.919 |    |
| 1 | SCN8A | I1827V            | 2            | 120796                | 0                | 0.00001656                         |                                                                                  | 1        | C term                                          | 0     | 0                 | 0.007           | 0               | 0.56    | 1    | -3.71  | 0                    | 0.28                 | 0    | 0.961     | 0         | 0.500         | 0   | 0 | 0.55   | 1  | 0.950 | 0  | 0.104 |    |
| 1 | SCN8A | L1829P            | 1            | 120794                | 0                | 0.00000279                         |                                                                                  | 1        | C term                                          | 1     | 1                 | 1               | 1               | -3.54   | 1    | -4.35  | 1                    | -3.75                | 1    | 0         | 1         | 0.580         | 0.5 | 0 | 2.865  | 1  | 0.663 | 1  | 0.846 |    |
| 1 | SCN8A | A1831T            | 2            | 120788                | 0                | 0.00001656                         |                                                                                  | 1        | C term                                          | 1     | 1                 | 0.98            | 0               | -1.46   | 1    | -3.95  | 0                    | -2.43                | 1    | 0.001     | 1         | 0.552         | 0   | 0 | 0.725  | 1  | 0.286 | 0  | 0.383 |    |
| 1 | SCN8A | M1835V            | 3            | 120784                | 0                | 0.00002484                         |                                                                                  | 1        | C term                                          | 0     | 0                 | 0.07            | 0               | -0.18   | 1    | -3.82  | 1                    | -3.48                | 1    | 0.023     | 1         | 0.576         | 0.5 | 0 | 2.185  | 1  | 0.224 | 0  | 0.356 |    |
| 1 | SCN8A | R1841C            | 1            | 120772                | 0                | 0.00000282                         |                                                                                  | 1        | C term                                          | 1     | 1                 | 1               | 1               | -4.65   | 1    | -4.05  | 1                    | -7.44                | 1    | 0         | 1         | 0.672         | 0.5 | 0 | 1.475  | 1  | 0.668 | 1  | 0.897 |    |
| 1 | SCN8A | V1874M            | 1            | 120780                | 0                | 0.00000283                         |                                                                                  | 1        | C term                                          | 0     | 0                 | 0.046           | 0               | 0.79    | 1    | -3.71  | 0                    | 2.41                 | 0    | 1         | 0         | 0.409         | 0   | 0 | 1.865  | 1  | 0.077 | 0  | 0.052 |    |
| 1 | SCN8A | F1884K            | 1            | 120738                | 0                | 0.00000282                         |                                                                                  | 1        | C term                                          | 1     | 1                 | 0.996           | 0               | -1.55   | 1    | -4.04  | 1                    | -3.42                | 1    | 0.001     | 1         | 0.616         | 0.5 | 0 | 2.61   | 1  | 0.801 | 1  | 0.925 |    |
| 1 | SCN8A | T1885S            | 1            | 120750                | 0                | 0.00000282                         |                                                                                  | 1        | C term                                          | 0.5   | 0                 | 0.874           | 0               | -1.39   | 1    | -4.04  | 1                    | -2.92                | 1    | 0.008     | 1         | 0.547         | 0   | 0 | 1.085  | 1  | 0.141 | 0  | 0.246 |    |
| 1 | SCN8A | R1891C            | 2            | 120752                | 0                | 0.00001656                         |                                                                                  | 1        | C term                                          | 1     | 1                 | 1               | 1               | -4.43   | 1    | -3.98  | 1                    | -6.23                | 1    | 0         | 1         | 0.624         | 0.5 | 0 | 3.14   | 1  | 0.514 | 0  | 0.780 |    |
| 1 | SCN8A | F1896G            | 1            | 120752                | 0                | 0.00000281                         |                                                                                  | 1        | C term                                          | 0.5   | 0                 | 0.879           | 0               | -2.96   | 1    | -4.07  | 1                    | -6.13                | 1    | 0         | 1         | 0.613         | 0.5 | 0 | 2.235  | 1  | 0.483 | 0  | 0.744 |    |
| 1 | SCN8A | R1894C            | 1            | 120740                | 0                | 0.00000282                         |                                                                                  | 1        | C term                                          | 1     | 1                 | 1               | 1               | -2.02   | 0    | -1.62  | 1                    | -7.41                | 1    | 0         | 0         | 0.499         | 0.5 | 0 | 2.61   | 1  | 0.025 | 0  | 0.106 |    |
| 1 | SCN8A | R1804H            | 2            | 120740                | 0                | 0.00001656                         |                                                                                  | 1        | C term                                          | 1     | 1                 | 0.998           | 1               | -3.89   | 0    | -1.57  | 1                    | -4.58                | 1    | 0         | 0         | 0.406         | 0   | 0 | 1.64   | 0  | 0.009 | 0  | 0.002 |    |
| 1 | SCN8A | R1807W            | 1            | 120748                | 0                | 0.00000282                         |                                                                                  | 1        | C term                                          | 1     | 1                 | 1               | 1               | -17.58  | 0    | -1.07  | 1                    | -7.44                | 1    | 0         | 1         | 0.693         | 0.5 | 0 | 2.95   | 1  | 0.372 | 0  | 0.434 |    |
| 1 | SCN8A | G1808R            | 1            | 120746                | 0                | 0.00000282                         |                                                                                  | 1        | C term                                          | 0     | 0                 | 0               | 1               | -3.11   | 0    | -1.01  | 0                    | -3.98                | 0    | 1         | 0         | 0.360         | 0   | 0 | -1.21  | 0  | 0.002 | 0  | 0.002 |    |
| 1 | SCN8A | H1909Y            | 1            | 120740                | 0                | 0.00000282                         |                                                                                  | 1        | C term                                          | 0     | 0                 | 0               | 0               | -1.49   | 0    | -2.11  | 0                    | -1.97                | 0    | 0.666     | 0         | 0.400         | 0   | 0 | 0.525  | 0  | 0.003 | 0  | 0.002 |    |
| 1 | SCN8A | R192K             | 1            | 120720                | 0                | 0.00000284                         |                                                                                  | 1        | C term                                          | 0     | 0                 | 0.009           | 1               | -5.24   | 0    | -0.07  | 0                    | -1.07                | 0    | 0.587     | 0         | 0.473         | 0   | 0 | 0.74   | 0  | 0.004 | 0  | 0.010 |    |
| 1 | SCN8A | T1921A            | 2            | 120672                | 0                | 0.00001657                         |                                                                                  | 1        | C term                                          | 0     | 0                 | 0               | 0               | -0.17   | 1    | -3.78  | 0                    | 0.04                 | 0    | 0.254     | 0         | 0.492         | 0   | 0 | 0      | 0  | 0.020 | 0  | 0.088 |    |
| 1 | SCN8A | T1921P            | 8            | 120672                | 0                | 0.0000661                          |                                                                                  | 1        | C term                                          | 0     | 0                 | 0               | 0               | -1.8    | 1    | -3.87  | 0                    | -1.11                | 0    | 0.164     | 0         | 0.494         | 0   | 0 | 0.69   | 1  | 0.012 | 0  | 0.099 |    |
| 1 | SCN8A | G1926C            | 1            | 120670                | 0                | 0.00000807                         |                                                                                  | 1        | C term                                          | 0     | 0                 | 0.126           | 0               | -0.13   | 0    | -1.78  | 0                    | -0.51                | 0    | 0.142     | 0         | 0.492         | 0   | 0 | 0.895  | 1  | 0.012 | 0  | 0.091 |    |
| 1 | SCN8A | T1938I            | 1            | 120322                | 0                | 0.00000811                         |                                                                                  | 1        | C term                                          | 0     | 0                 | 0.26            | 0               | -1.01   | 1    | -3.86  | 0                    | -1.67                | 1    | 0.004     | 1         | 0.531         | 0   | 0 | 1.28   | 0  | 0.023 | 0  | 0.100 |    |
| 1 | SCN8A | R1939W            | 1            | 120318                | 0                | 0.00000812                         |                                                                                  | 1        | C term                                          | 1     | 1                 | 0.999           | 1               | -3.89   | 1    | -3.89  | 0                    | -1.72                | 1    | 0.005     | 1         | 0.541         | 0   | 0 | 0.805  | 1  | 0.092 | 0  | 0.185 |    |
| 1 | SCN8A | R1932Q            | 2            | 120328                | 0                | 0.00001665                         |                                                                                  | 1        | C term                                          | 1     | 1                 | 0.002           | 0               | 0.01    | 1    | -3.79  | 0                    | 0.04                 | 0    | 0.281     | 1         | 0.519         | 0   | 0 | 0.235  | 0  | 0.020 | 0  | 0.132 |    |
| 1 | SCN8A | R1932P            | 7            | 120328                | 0                | 0.00005827                         |                                                                                  | 1        | C term                                          | 0     | 0                 | 0               | 0               | -0.45   | 1    | -3.82  | 0                    | 0.92                 | 0    | 1         | 0         | 0.486         | 0   | 0 | -0.44  | 1  | 0.013 | 0  | 0.090 |    |
| 1 | SCN8A | T1938H            | 1            | 119458                | 0                | 0.00000873                         |                                                                                  | 1        | C term                                          | 1     | 1                 | 0.991           | 0               | -1.97   | 1    | -4     | 1                    | -2.67                | 1    | 0.002     | 1         | 0.564         | 0   | 0 | 1.89   | 1  | 0.346 | 0  | 0.486 |    |
| 1 | SCN8A | P1945L            | 1            | 117326                | 0                | 0.00000823                         |                                                                                  | 1        | C term                                          | 1     | 1                 | 1               | 1               | -1.49   | 1    | -3.96  | 1                    | -8.68                | 1    | 0.002     | 1         | 0.573         | 0.5 | 0 | 2.01   | 1  | 0.472 | 0  | 0.640 |    |
| 1 | SCN8A | S1946T            | 1            | 117270                | 0                | 0.00000827                         |                                                                                  | 1        | C term                                          | 1     | 1                 | 0.997           | 0               | -2.4    | 1    | -4.15  | 1                    | -2.67                | 1    | 0.001     | 1         | 0.577         | 0.5 | 0 | 2.01   | 1  | 0.615 | 1  | 0.795 |    |
| 1 | SCN8A | R1960L            | 1            | 108918                | 0                | 0.00000841                         |                                                                                  | 1        | C term                                          | 0     | 0                 | 0.307           | 0               | -1.48   | 1    | -3.9   | 0                    | -1                   | 1    | 0.028     | 0         | 0.503         | 0   | 0 | 0      | 1  | 0.120 | 0  | 0.152 |    |
| 1 | SCN8A | R1960Q            | 3            | 108918                | 0                | 0.00002754                         |                                                                                  | 1        | C term                                          | 0     | 0                 | 0.013           | 0               | -0.62   | 1    | -3.85  | 0                    | -0.09                | 1    | 0.028     | 0         | 0.502         | 0   | 0 | -0.55  | 1  | 0.080 | 0  | 0.126 |    |
| 1 | SCN8A | G1964R            | 1            | 104130                | 0                | 0.00000802                         |                                                                                  | 1        | C term                                          | 0.5   | 0                 | 0.819           | 0               | -6.35   | 1    | -3.81  | 0                    | -2.1                 | 1    | 0.026     | 1         | 0.539         | 0   | 0 | 0.69   | 1  | 0.081 | 0  | 0.170 |    |
| 1 | SCN8A | R1964K            | 1            | 102086                | 0                | 0.00000971                         |                                                                                  | 1        | C term                                          | 0     | 0                 | 0               | 0               | -0.86   | 1    | -3.65  | 0                    | -1                   | 0    | 1         | 0         | 0.461         | 0   | 0 | -0.265 | 1  | 0.052 | 0  | 0.066 |    |
| 1 | SCN8A | R1968K            | 1            | 98388                 | 0                | 0.00001016                         |                                                                                  | 1        | C term                                          | 1     | 1                 | 1               | 0               | 0.98    | 1    | -3.63  | 0                    | -1.29                | 0    | 1         | 0         | 0.478         | 0   | 0 | -1.175 | 1  | 0.063 | 0  | 0.087 |    |

| AF  | AG                  | AH |
|-----|---------------------|----|
| 1   |                     |    |
| 2   |                     |    |
| 3   |                     |    |
| 4   |                     |    |
| 5   | from as father      |    |
| 6   |                     |    |
| 7   |                     |    |
| 8   |                     |    |
| 9   |                     |    |
| 10  | pro and inheritance |    |
| 11  |                     |    |
| 12  |                     |    |
| 13  |                     |    |
| 14  |                     |    |
| 15  |                     |    |
| 16  |                     |    |
| 17  |                     |    |
| 18  |                     |    |
| 19  |                     |    |
| 20  |                     |    |
| 21  |                     |    |
| 22  |                     |    |
| 23  |                     |    |
| 24  |                     |    |
| 25  |                     |    |
| 26  |                     |    |
| 27  |                     |    |
| 28  |                     |    |
| 29  |                     |    |
| 30  |                     |    |
| 31  |                     |    |
| 32  |                     |    |
| 33  |                     |    |
| 34  |                     |    |
| 35  |                     |    |
| 36  |                     |    |
| 37  |                     |    |
| 38  |                     |    |
| 39  |                     |    |
| 40  |                     |    |
| 41  |                     |    |
| 42  |                     |    |
| 43  |                     |    |
| 44  |                     |    |
| 45  |                     |    |
| 46  |                     |    |
| 47  |                     |    |
| 48  |                     |    |
| 49  |                     |    |
| 50  |                     |    |
| 51  |                     |    |
| 52  |                     |    |
| 53  |                     |    |
| 54  |                     |    |
| 55  |                     |    |
| 56  |                     |    |
| 57  |                     |    |
| 58  |                     |    |
| 59  |                     |    |
| 60  |                     |    |
| 61  |                     |    |
| 62  |                     |    |
| 63  |                     |    |
| 64  |                     |    |
| 65  |                     |    |
| 66  |                     |    |
| 67  |                     |    |
| 68  |                     |    |
| 69  |                     |    |
| 70  |                     |    |
| 71  |                     |    |
| 72  |                     |    |
| 73  |                     |    |
| 74  |                     |    |
| 75  |                     |    |
| 76  |                     |    |
| 77  |                     |    |
| 78  |                     |    |
| 79  |                     |    |
| 80  |                     |    |
| 81  |                     |    |
| 82  |                     |    |
| 83  |                     |    |
| 84  |                     |    |
| 85  |                     |    |
| 86  |                     |    |
| 87  |                     |    |
| 88  |                     |    |
| 89  |                     |    |
| 90  |                     |    |
| 91  |                     |    |
| 92  |                     |    |
| 93  |                     |    |
| 94  |                     |    |
| 95  |                     |    |
| 96  |                     |    |
| 97  |                     |    |
| 98  |                     |    |
| 99  |                     |    |
| 100 |                     |    |
| 101 |                     |    |
| 102 |                     |    |
| 103 |                     |    |
| 104 |                     |    |
| 105 |                     |    |
| 106 |                     |    |
| 107 |                     |    |
| 108 |                     |    |
| 109 |                     |    |
| 110 |                     |    |
| 111 |                     |    |
| 112 |                     |    |
| 113 |                     |    |
| 114 |                     |    |
| 115 |                     |    |
| 116 |                     |    |
| 117 |                     |    |
| 118 |                     |    |
| 119 |                     |    |
| 120 |                     |    |
| 121 |                     |    |
| 122 |                     |    |
| 123 |                     |    |
| 124 |                     |    |
| 125 |                     |    |
| 126 |                     |    |
| 127 |                     |    |
| 128 |                     |    |
| 129 |                     |    |
| 130 |                     |    |
| 131 |                     |    |
| 132 |                     |    |
| 133 |                     |    |
| 134 |                     |    |
| 135 |                     |    |
| 136 |                     |    |
| 137 |                     |    |
| 138 |                     |    |
| 139 |                     |    |
| 140 |                     |    |
| 141 |                     |    |
| 142 |                     |    |
| 143 |                     |    |
| 144 |                     |    |
| 145 |                     |    |
| 146 |                     |    |
| 147 |                     |    |
| 148 |                     |    |
| 149 |                     |    |
| 150 |                     |    |
| 151 |                     |    |
| 152 |                     |    |
| 153 |                     |    |
| 154 |                     |    |
| 155 |                     |    |
| 156 |                     |    |
| 157 |                     |    |
| 158 |                     |    |
| 159 |                     |    |
| 160 |                     |    |
| 161 |                     |    |
| 162 |                     |    |
| 163 |                     |    |
| 164 |                     |    |
| 165 |                     |    |
| 166 |                     |    |
| 167 |                     |    |
| 168 |                     |    |
| 169 |                     |    |
| 170 |                     |    |
| 171 |                     |    |
| 172 |                     |    |
| 173 |                     |    |
| 174 |                     |    |
| 175 |                     |    |
| 176 |                     |    |
| 177 |                     |    |
| 178 |                     |    |
| 179 |                     |    |
| 180 |                     |    |
| 181 |                     |    |
| 182 |                     |    |
| 183 |                     |    |
| 184 |                     |    |
| 185 |                     |    |
| 186 |                     |    |
| 187 |                     |    |
| 188 |                     |    |
| 189 |                     |    |
| 190 |                     |    |
| 191 |                     |    |
| 192 |                     |    |
| 193 |                     |    |
| 194 |                     |    |
| 195 |                     |    |
| 196 |                     |    |
| 197 |                     |    |
| 198 |                     |    |
| 199 |                     |    |
| 200 |                     |    |







| AF  | AG | AH |
|-----|----|----|
| 1   |    |    |
| 2   |    |    |
| 3   |    |    |
| 4   |    |    |
| 5   |    |    |
| 6   |    |    |
| 7   |    |    |
| 8   |    |    |
| 9   |    |    |
| 10  |    |    |
| 11  |    |    |
| 12  |    |    |
| 13  |    |    |
| 14  |    |    |
| 15  |    |    |
| 16  |    |    |
| 17  |    |    |
| 18  |    |    |
| 19  |    |    |
| 20  |    |    |
| 21  |    |    |
| 22  |    |    |
| 23  |    |    |
| 24  |    |    |
| 25  |    |    |
| 26  |    |    |
| 27  |    |    |
| 28  |    |    |
| 29  |    |    |
| 30  |    |    |
| 31  |    |    |
| 32  |    |    |
| 33  |    |    |
| 34  |    |    |
| 35  |    |    |
| 36  |    |    |
| 37  |    |    |
| 38  |    |    |
| 39  |    |    |
| 40  |    |    |
| 41  |    |    |
| 42  |    |    |
| 43  |    |    |
| 44  |    |    |
| 45  |    |    |
| 46  |    |    |
| 47  |    |    |
| 48  |    |    |
| 49  |    |    |
| 50  |    |    |
| 51  |    |    |
| 52  |    |    |
| 53  |    |    |
| 54  |    |    |
| 55  |    |    |
| 56  |    |    |
| 57  |    |    |
| 58  |    |    |
| 59  |    |    |
| 60  |    |    |
| 61  |    |    |
| 62  |    |    |
| 63  |    |    |
| 64  |    |    |
| 65  |    |    |
| 66  |    |    |
| 67  |    |    |
| 68  |    |    |
| 69  |    |    |
| 70  |    |    |
| 71  |    |    |
| 72  |    |    |
| 73  |    |    |
| 74  |    |    |
| 75  |    |    |
| 76  |    |    |
| 77  |    |    |
| 78  |    |    |
| 79  |    |    |
| 80  |    |    |
| 81  |    |    |
| 82  |    |    |
| 83  |    |    |
| 84  |    |    |
| 85  |    |    |
| 86  |    |    |
| 87  |    |    |
| 88  |    |    |
| 89  |    |    |
| 90  |    |    |
| 91  |    |    |
| 92  |    |    |
| 93  |    |    |
| 94  |    |    |
| 95  |    |    |
| 96  |    |    |
| 97  |    |    |
| 98  |    |    |
| 99  |    |    |
| 100 |    |    |

| AF  | AG | AH |
|-----|----|----|
| 1   |    |    |
| 2   |    |    |
| 3   |    |    |
| 4   |    |    |
| 5   |    |    |
| 6   |    |    |
| 7   |    |    |
| 8   |    |    |
| 9   |    |    |
| 10  |    |    |
| 11  |    |    |
| 12  |    |    |
| 13  |    |    |
| 14  |    |    |
| 15  |    |    |
| 16  |    |    |
| 17  |    |    |
| 18  |    |    |
| 19  |    |    |
| 20  |    |    |
| 21  |    |    |
| 22  |    |    |
| 23  |    |    |
| 24  |    |    |
| 25  |    |    |
| 26  |    |    |
| 27  |    |    |
| 28  |    |    |
| 29  |    |    |
| 30  |    |    |
| 31  |    |    |
| 32  |    |    |
| 33  |    |    |
| 34  |    |    |
| 35  |    |    |
| 36  |    |    |
| 37  |    |    |
| 38  |    |    |
| 39  |    |    |
| 40  |    |    |
| 41  |    |    |
| 42  |    |    |
| 43  |    |    |
| 44  |    |    |
| 45  |    |    |
| 46  |    |    |
| 47  |    |    |
| 48  |    |    |
| 49  |    |    |
| 50  |    |    |
| 51  |    |    |
| 52  |    |    |
| 53  |    |    |
| 54  |    |    |
| 55  |    |    |
| 56  |    |    |
| 57  |    |    |
| 58  |    |    |
| 59  |    |    |
| 60  |    |    |
| 61  |    |    |
| 62  |    |    |
| 63  |    |    |
| 64  |    |    |
| 65  |    |    |
| 66  |    |    |
| 67  |    |    |
| 68  |    |    |
| 69  |    |    |
| 70  |    |    |
| 71  |    |    |
| 72  |    |    |
| 73  |    |    |
| 74  |    |    |
| 75  |    |    |
| 76  |    |    |
| 77  |    |    |
| 78  |    |    |
| 79  |    |    |
| 80  |    |    |
| 81  |    |    |
| 82  |    |    |
| 83  |    |    |
| 84  |    |    |
| 85  |    |    |
| 86  |    |    |
| 87  |    |    |
| 88  |    |    |
| 89  |    |    |
| 90  |    |    |
| 91  |    |    |
| 92  |    |    |
| 93  |    |    |
| 94  |    |    |
| 95  |    |    |
| 96  |    |    |
| 97  |    |    |
| 98  |    |    |
| 99  |    |    |
| 100 |    |    |

|    | AF | AG | AH |
|----|----|----|----|
| 1  |    |    |    |
| 2  |    |    |    |
| 3  |    |    |    |
| 4  |    |    |    |
| 5  |    |    |    |
| 6  |    |    |    |
| 7  |    |    |    |
| 8  |    |    |    |
| 9  |    |    |    |
| 10 |    |    |    |
| 11 |    |    |    |
| 12 |    |    |    |
| 13 |    |    |    |
| 14 |    |    |    |
| 15 |    |    |    |
| 16 |    |    |    |
| 17 |    |    |    |
| 18 |    |    |    |
| 19 |    |    |    |
| 20 |    |    |    |
| 21 |    |    |    |
| 22 |    |    |    |
| 23 |    |    |    |
| 24 |    |    |    |
| 25 |    |    |    |
| 26 |    |    |    |
| 27 |    |    |    |
| 28 |    |    |    |
| 29 |    |    |    |
| 30 |    |    |    |
| 31 |    |    |    |
| 32 |    |    |    |
