# Supplementary material
Source: PubMed Central journal article supplement (PMC5505324)
Supplement: NIHMS870570-supplement-Supp_TableS3.pdf [file NIHMS870570-supplement-Supp_TableS3.pdf]

| GENE  | CHR | DNA_LOC  | REF. | ALT | Amino | AA_R | AA_L | SCN Index | SCN Index Prediction | GENE  | CHR | DNA_LOC  | REF. | ALT | Amino | AA_R | AA_L | SCN Index | SCN Index Prediction | GENE  | CHR | DNA_LOC | REF. | ALT | Amino | AA_R | AA_L | SCN Index | SCN Index Prediction |
|-------|-----|----------|------|-----|-------|------|------|-----------|----------------------|-------|-----|----------|------|-----|-------|------|------|-----------|----------------------|-------|-----|---------|------|-----|-------|------|------|-----------|----------------------|
| SCN2A | 2   | 16690130 | A    | C   | 1     | M    | R    | 0.901     | Likely Pathogenic    | SCN2A | 2   | 16615234 | A    | C   | 1     | M    | L    | 0.801     | Likely Pathogenic    | SCN2A | 12  | 5205602 | A    | G   | 1     | M    | L    | 0.892     | Likely Pathogenic    |
| SCN2A | 2   | 16690130 | A    | G   | 1     | M    | T    | 0.894     | Likely Pathogenic    | SCN2A | 2   | 16615234 | A    | G   | 1     | M    | L    | 0.855     | Likely Pathogenic    | SCN2A | 12  | 5205602 | A    | C   | 1     | M    | V    | 0.870     | Likely Pathogenic    |
| SCN2A | 2   | 16690130 | A    | C   | 1     | M    | T    | 0.894     | Likely Pathogenic    | SCN2A | 2   | 16615234 | A    | G   | 1     | M    | L    | 0.855     | Likely Pathogenic    | SCN2A | 12  | 5205602 | A    | C   | 1     | M    | V    | 0.870     | Likely Pathogenic    |
| SCN2A | 2   | 16690129 | C    | A   | 1     | M    | T    | 0.861     | Likely Pathogenic    | SCN2A | 2   | 16615235 | T    | A   | 1     | M    | K    | 0.815     | Likely Pathogenic    | SCN2A | 12  | 5205603 | T    | A   | 1     | M    | K    | 0.893     | Likely Pathogenic    |
| SCN2A | 2   | 16690129 | C    | A   | 1     | M    | T    | 0.861     | Likely Pathogenic    | SCN2A | 2   | 16615235 | T    | A   | 1     | M    | K    | 0.815     | Likely Pathogenic    | SCN2A | 12  | 5205603 | T    | A   | 1     | M    | K    | 0.893     | Likely Pathogenic    |
| SCN2A | 2   | 16690129 | C    | A   | 1     | M    | T    | 0.861     | Likely Pathogenic    | SCN2A | 2   | 16615235 | T    | A   | 1     | M    | K    | 0.815     | Likely Pathogenic    | SCN2A | 12  | 5205603 | T    | A   | 1     | M    | K    | 0.893     | Likely Pathogenic    |
| SCN2A | 2   | 16690128 | C    | G   | 2     | E    | Q    | 0.320     | Likey Benien         | SCN2A | 2   | 16615236 | G    | A   | 1     | M    | I    | 0.817     | Likey Benien         | SCN2A | 12  | 5205604 | G    | A   | 1     | M    | I    | 0.903     | Likey Pathogenic     |
| SCN2A | 2   | 16690127 | E    | A   | 2     | E    | V    | 0.360     | Likey Benien         | SCN2A | 2   | 16615236 | G    | T   | 1     | M    | I    | 0.816     | Likey Pathogenic     | SCN2A | 12  | 5205604 | G    | T   | 1     | M    | I    | 0.898     | Likey Pathogenic     |
| SCN2A | 2   | 16690127 | E    | A   | 2     | E    | V    | 0.303     | Likey Benien         | SCN2A | 2   | 16615237 | G    | T   | 1     | M    | I    | 0.816     | Likey Pathogenic     | SCN2A | 12  | 5205604 | G    | T   | 1     | M    | I    | 0.903     | Likey Pathogenic     |
| SCN2A | 2   | 16690127 | E    | A   | 2     | E    | V    | 0.303     | Likey Benien         | SCN2A | 2   | 16615237 | G    | T   | 1     | M    | I    | 0.816     | Likey Pathogenic     | SCN2A | 12  | 5205604 | G    | T   | 1     | M    | I    | 0.903     | Likey Pathogenic     |
| SCN2A | 2   | 16690126 | C    | A   | 2     | E    | D    | 0.226     | Likey Benien         | SCN2A | 2   | 16615237 | G    | C   | 2     | A    | P    | 0.91      | Likey Pathogenic     | SCN2A | 12  | 5205605 | G    | C   | 2     | A    | P    | 0.854     | Likey Pathogenic     |
| SCN2A | 2   | 16690125 | C    | A   | 2     | E    | D    | 0.226     | Likey Benien         | SCN2A | 2   | 16615238 | G    | C   | 2     | A    | P    | 0.91      | Likey Pathogenic     | SCN2A | 12  | 5205605 | G    | C   | 2     | A    | P    | 0.854     | Likey Pathogenic     |
| SCN2A | 2   | 16690125 | C    | A   | 2     | E    | D    | 0.226     | Likey Benien         | SCN2A | 2   | 16615238 | G    | C   | 2     | A    | P    | 0.91      | Likey Pathogenic     | SCN2A | 12  | 5205605 | G    | C   | 2     | A    | P    | 0.854     | Likey Pathogenic     |
| SCN2A | 2   | 16690125 | C    | A   | 2     | E    | D    | 0.226     | Likey Benien         | SCN2A | 2   | 16615238 | G    | C   | 2     | A    | P    | 0.91      | Likey Pathogenic     | SCN2A | 12  | 5205605 | G    | C   | 2     | A    | P    | 0.854     | Likey Pathogenic     |
| SCN2A | 2   | 16690124 | C    | A   | 2     | E    | D    | 0.226     | Likey Benien         | SCN2A | 2   | 16615238 | G    | C   | 2     | A    | P    | 0.91      | Likey Pathogenic     | SCN2A | 12  | 5205605 | G    | C   | 2     | A    | P    | 0.854     | Likey Pathogenic     |
| SCN2A | 2   | 16690124 | C    | A   | 2     | E    | D    | 0.226     | Likey Benien         | SCN2A | 2   | 16615238 | G    | C   | 2     | A    | P    | 0.91      | Likey Pathogenic     | SCN2A | 12  | 5205605 | G    | C   | 2     | A    | P    | 0.854     | Likey Pathogenic     |
| SCN2A | 2   | 16690123 | C    | A   | 2     | E    | D    | 0.226     | Likey Benien         | SCN2A | 2   | 16615238 | G    | C   | 2     | A    | P    | 0.91      | Likey Pathogenic     | SCN2A | 12  | 5205605 | G    | C   | 2     | A    | P    | 0.854     | Likey Pathogenic     |
| SCN2A | 2   | 16690122 | C</  |     |       |      |      |           |                      |       |     |          |      |     |       |      |      |           |                      |       |     |         |      |     |       |      |      |           |                      |

| GENE  |     |           |     |     |       |      |      |           |                      | GENE  |     |           |     |     |       |      |       |               |                      | GENE  |           |           |     |     |       |      |      |           |                      |               |               |
|-------|-----|-----------|-----|-----|-------|------|------|-----------|----------------------|-------|-----|-----------|-----|-----|-------|------|-------|---------------|----------------------|-------|-----------|-----------|-----|-----|-------|------|------|-----------|----------------------|---------------|---------------|
| CH    | DNA | LOC       | REF | ALT | Amino | AA_R | AA_L | SCN Index | SCN Index Prediction | CH    | DNA | LOC       | REF | ALT | Amino | AA_R | AA_L  | SCN Index     | SCN Index Prediction | CH    | DNA       | LOC       | REF | ALT | Amino | AA_R | AA_L | SCN Index | SCN Index Prediction |               |               |
| SCN2A | 2   | 166930046 | A   | G   | 29    | I    | S    | 0.423     | Likely Benign        | SCN2A | 2   | 166192419 | T   | G   | 29    | I    | S     | 0.492         | Likely Benign        | SCN2A | 12        | 125066868 | G   | T   | A     | G    | 29   | I         | M                    | 0.434         | Likely Benign |
| SCN2A | 2   | 166930046 | A   | C   | 29    | I    | S    | 0.609     | Likely Benign        | SCN2A | 2   | 166192419 | T   | G   | 29    | I    | S     | 0.365         | Likely Benign        | SCN2A | 12        | 125066869 | G   | T   | A     | G    | 30   | A         | T                    | 0.589         | Likely Benign |
| SCN2A | 2   | 166930046 | A   | G   | 29    | I    | S    | 0.423     | Likely Benign        | SCN2A | 2   | 166192420 | T   | G   | 29    | I    | M     | 0.431         | Likely Benign        | SCN2A | 12        | 125066870 | G   | T   | A     | G    | 30   | A         | P                    | 0.659         | Likely Benign |
| SCN2A | 2   | 166930045 | A   | C   | 29    | I    | M    | 0.428     | Likely Benign        | SCN2A | 2   | 166192421 | G   | C   | 30    | A    | T     | 0.467         | Likely Benign        | SCN2A | 12        | 125066880 | G   | T   | A     | G    | 30   | A         | S                    | 0.330         | Likely Benign |
| SCN2A | 2   | 166930044 | A   | C   | 29    | I    | M    | 0.729     | Likely Benign        | SCN2A | 2   | 166192422 | G   | C   | 30    | A    | V     | 0.521         | Likely Benign        | SCN2A | 12        | 125066890 | G   | T   | A     | G    | 30   | A         | S                    | 0.686         | Likely Benign |
| SCN2A | 2   | 166930044 | A   | C   | 29    | I    | M    | 0.729     | Likely Benign        | SCN2A | 2   | 166192423 | G   | C   | 30    | A    | S     | 0.395         | Likely Benign        | SCN2A | 12        | 125066900 | G   | T   | A     | G    | 30   | A         | G                    | 0.659         | Likely Benign |
| SCN2A | 2   | 166930044 | A   | C   | 30    | A    | P    | 0.380     | Likely Benign        | SCN2A | 2   | 166192424 | G   | T   | 30    | A    | S     | 0.241         | Likely Benign        | SCN2A | 12        | 125066910 | G   | T   | A     | G    | 30   | A         | G                    | 0.686         | Likely Benign |
| SCN2A | 2   | 166930044 | C   | T   | 30    | A    | T    | 0.679     | Likely Benign        | SCN2A | 2   | 166192425 | A   | C   | 31    | E    | Q     | 0.302         | Likely Benign        | SCN2A | 12        | 125066920 | G   | T   | A     | G    | 30   | A         | V                    | 0.460         | Likely Benign |
| SCN2A | 2   | 166930043 | A   | C   | 30    | A    | T    | 0.809     | Likely Benign        | SCN2A | 2   | 166192426 | A   | C   | 31    | E    | Q     | 0.302         | Likely Benign        | SCN2A | 12        | 125066930 | G   | T   | A     | G    | 31   | E         | Q                    | 0.688         | Likely Benign |
| SCN2A | 2   | 166930041 | C   | G   | 31    | E    | Q    | 0.312     | Likely Benign        | SCN2A | 2   | 166192427 | C   | T   | 30    | A    | V     | 0.521         | Likely Benign        | SCN2A | 12        | 125066940 | G   | T   | A     | G    | 31   | E         | Q                    | 0.474         | Likely Benign |
| SCN2A | 2   | 166930041 | C   | G   | 31    | E    | Q    | 0.312     | Likely Benign        | SCN2A | 2   | 166192428 | A   | C   | 32    | E    | A     | 0.654         | Likely Benign        | SCN2A | 12        | 125066950 | G   | T   | A     | G    | 31   | E         | Q                    | 0.466         | Likely Benign |
| SCN2A | 2   | 166930041 | C   | G   | 31    | E    | K    | 0.326     | Likely Benign        | SCN2A | 2   | 166192429 | G   | T   | 32    | D    | 0.441 | Likely Benign | SCN2A                | 12    | 125066960 | G         | T   | A   | G     | 31   | E    | V         | 0.860                | Likely Benign |               |
| SCN2A | 2   | 166930041 | C   | G   | 31    | E    | K    | 0.326     | Likely Benign        | SCN2A | 2   | 166192430 | G   | T   | 32    | D    | 0.441 | Likely Benign | SCN2A                | 12    | 125066970 | G         | T   | A   | G     | 31   | E    | V         | 0.860                | Likely Benign |               |
| SCN2A | 2   | 166930040 | T   | C   | 31    | E    | G    | 0.697     | Likely Benign        | SCN2A | 2   | 166192431 | A   | C   | 33    | K    | T     | 0.631         | Likely Benign        | SCN2A | 12        | 125066980 | G   | T   | A     | G    | 31   | E         | D                    | 0.408         | Likely Benign |
| SCN2A | 2   | 166930039 | T   | A   | 31    | E    | D    | 0.276     | Likely Benign        | SCN2A | 2   | 166192432 | A   | C   | 33    | K    | T     | 0.631         | Likely Benign        | SCN2A | 12        | 125066990 | G   | T   | A     | G    | 32   | S         | G                    | 0.054         | Likely Benign |
| SCN2A | 2   | 166930039 | T   | A   | 31    | E    | D    | 0.276     | Likely Benign        | SCN2A | 2   | 166192433 | A   | C   | 33    | K    | T     | 0.631         | Likely Benign        | SCN2A | 12        | 125066995 | G   | T   | A     | G    | 32   | S         | G                    | 0.054         | Likely Benign |
| SCN2A | 2</ |           |     |     |       |      |      |           |                      |       |     |           |     |     |       |      |       |               |                      |       |           |           |     |     |       |      |      |           |                      |               |               |







| GENE  |     |           |     |     |       |      |      |           |                      | SCN Index |     |          |     |     |       |      |      |           |                      | GENE  |     |          |     |     |       |      |      |           |                      | SCN Index |  |  |  |  |  |  |  |  |  |
|-------|-----|-----------|-----|-----|-------|------|------|-----------|----------------------|-----------|-----|----------|-----|-----|-------|------|------|-----------|----------------------|-------|-----|----------|-----|-----|-------|------|------|-----------|----------------------|-----------|--|--|--|--|--|--|--|--|--|
| GENE  | CHR | DNA_LOC   | REF | ALT | Amino | AA_R | AA_A | SCN Index | SCN Index Prediction | GENE      | CHR | DNA_LOC  | REF | ALT | Amino | AA_R | AA_A | SCN Index | SCN Index Prediction | GENE  | CHR | DNA_LOC  | REF | ALT | Amino | AA_R | AA_A | SCN Index | SCN Index Prediction |           |  |  |  |  |  |  |  |  |  |
| SCN2A | 2   | 166912973 | T   | G   | 141   | N    | H    | 0.977     | Likely Pathogenic    | SCN2A     | 2   | 16614397 | T   | A   | 142   | N    | I    | 0.969     | Likely Pathogenic    | SCN2A | 12  | 12080178 | C   | A   | 141   | T    | N    | 0.980     | Likely Pathogenic    |           |  |  |  |  |  |  |  |  |  |
| SCN2A | 2   | 166912972 | T   | A   | 141   | N    | I    | 0.984     | Likely Pathogenic    | SCN2A     | 2   | 16614396 | C   | A   | 142   | N    | K    | 0.891     | Likely Pathogenic    | SCN2A | 12  | 12080178 | C   | A   | 141   | T    | S    | 0.939     | Likely Pathogenic    |           |  |  |  |  |  |  |  |  |  |
| SCN2A | 2   | 166912972 | T   | G   | 141   | N    | I    | 0.980     | Likely Pathogenic    | SCN2A     | 2   | 16614397 | T   | A   | 142   | N    | K    | 0.891     | Likely Pathogenic    | SCN2A | 12  | 12080178 | C   | A   | 141   | T    | S    | 0.939     | Likely Pathogenic    |           |  |  |  |  |  |  |  |  |  |
| SCN2A | 2   | 166912972 | T   | G   | 141   | N    | I    | 0.980     | Likely Pathogenic    | SCN2A     | 2   | 16614398 | T   | A   | 143   | C    | S    | 0.943     | Likely Pathogenic    | SCN2A | 12  | 12080180 | A   | C   | 142   | I    | L    | 0.948     | Likely Pathogenic    |           |  |  |  |  |  |  |  |  |  |
| SCN2A | 2   | 166912972 | T   | G   | 141   | N    | I    | 0.980     | Likely Pathogenic    | SCN2A     | 2   | 16614398 | T   | A   | 143   | C    | S    | 0.943     | Likely Pathogenic    | SCN2A | 12  | 12080180 | A   | C   | 142   | I    | L    | 0.948     | Likely Pathogenic    |           |  |  |  |  |  |  |  |  |  |
| SCN2A | 2   | 166912972 | T   | G   | 141   | N    | I    | 0.980     | Likely Pathogenic    | SCN2A     | 2   | 16614398 | T   | G   | 143   | C    | G    | 0.97      | Likely Pathogenic    | SCN2A | 12  | 12080180 | A   | T   | 142   | I    | F    | 0.981     | Likely Pathogenic    |           |  |  |  |  |  |  |  |  |  |
| SCN2A | 2   | 166912970 | A   | C   | 142   | C    | S    | 0.987     | Likely Pathogenic    | SCN2A     | 2   | 16614399 | G   | A   | 143   | C    | Y    | 0.977     | Likely Pathogenic    | SCN2A | 12  | 12080181 | T   | A   | 142   | I    | N    | 0.988     | Likely Pathogenic    |           |  |  |  |  |  |  |  |  |  |
| SCN2A | 2   | 166912970 | A   | T   | 142   | C    | S    | 0.977     | Likely Pathogenic    | SCN2A     | 2   | 16614400 | G   | T   | 143   | C    | F    | 0.971     | Likely Pathogenic    | SCN2A | 12  | 12080181 | T   | G   | 142   | I    | N    | 0.988     | Likely Pathogenic    |           |  |  |  |  |  |  |  |  |  |
| SCN2A | 2   | 166912969 | C   | G   | 142   | C    | S    | 0.975     | Likely Pathogenic    | SCN2A     | 2   | 16614401 | G   | C   | 144   | V    | L    | 0.568     | Likely Benign        | SCN2A | 12  | 12080181 | T   | G   | 142   | I    | N    | 0.988     | Likely Pathogenic    |           |  |  |  |  |  |  |  |  |  |
| SCN2A | 2   | 166912969 | C   | G   | 142   | C    | S    | 0.975     | Likely Pathogenic    | SCN2A     | 2   | 16614401 | G   | C   | 144   | V    | L    | 0.568     | Likely Benign        | SCN2A | 12  | 12080181 | T   | G   | 142   | I    | N    | 0.988     | Likely Pathogenic    |           |  |  |  |  |  |  |  |  |  |
| SCN2A | 2   | 166912967 | C   | A   | 143   | V    | M    | 0.903     | Likely Pathogenic    | SCN2A     | 2   | 16614402 | T   | G   | 144   | V    | E    | 0.915     | Likely Pathogenic    | SCN2A | 12  | 12080184 | G   | A   | 143   | L    | W    | 0.987     | Likely Pathogenic    |           |  |  |  |  |  |  |  |  |  |
| SCN2A | 2   | 166912967 | C   | A   | 143   | V    | M    | 0.903     | Likely Pathogenic    | SCN2A     | 2   | 16614402 | T   | G   | 144   | V    | E    | 0.915     | Likely Pathogenic    | SCN2A | 12  | 12080184 | G   | A   | 143   | L    | W    | 0.987     | Likely Pathogenic    |           |  |  |  |  |  |  |  |  |  |
| SCN2A | 2   | 166912966 | A   | C   | 143   | V    | E    | 0.879     | Likely Pathogenic    | SCN2A     | 2   | 16614403 | T   | G   | 145   | F    | L    | 0.583     | Likely Benign        | SCN2A | 12  | 12080185 | G   | T   | 143   | L    | F    | 0.916     | Likely Pathogenic    |           |  |  |  |  |  |  |  |  |  |
| SCN2A | 2   | 166912966 | A   | C   | 143   | V    | E    | 0.879     | Likely Pathogenic    | SCN2A     | 2   | 16614404 | T   | G   | 145   | F    | L    | 0.583     | Likely Benign        | SCN2A | 12  | 12080186 | A   | C   | 144   | T    | P    | 0.958     | Likely Pathogenic    |           |  |  |  |  |  |  |  |  |  |
| SCN2A | 2   | 166912964 | A   | G   | 144   | F    | L    | 0.912     | Likely Pathogenic    | SCN2A     | 2   | 16614404 | T   | G   | 145   | F    | L    | 0.583     | Likely Benign        | SCN2A | 12  | 12080186 | A   | C   | 144   | T    | P    | 0.958     | Likely Pathogenic    |           |  |  |  |  |  |  |  |  |  |
| SCN2A | 2   | 166912964 | A   | G   | 144   | F    | L    | 0.912     | Likely Pathogenic    | SCN2A     | 2   | 16614405 | T   | G   | 145   | F    | L    | 0.583     | Likely Benign        | SCN2A | 12  | 12080187 | C   | G   | 144   | T    | S    | 0.954     | Likely Pathogenic    |           |  |  |  |  |  |  |  |  |  |
| SCN2A | 2   | 166912964 | A   | G   | 144   | F    | L    | 0.912     | Likely Pathogenic    | SCN2A     | 2   | 16614405 | T   | G   | 145   | F    | L    |           |                      |       |     |          |     |     |       |      |      |           |                      |           |  |  |  |  |  |  |  |  |  |

[illegible]



[illegible]

[illegible]

| GENE  |           |     |     |     |       |      |       |               |                      | GENE  |          |     |     |     |       |      |       |               |                      | GENE  |     |          |     |     |       |      |      |           |                      |
|-------|-----------|-----|-----|-----|-------|------|-------|---------------|----------------------|-------|----------|-----|-----|-----|-------|------|-------|---------------|----------------------|-------|-----|----------|-----|-----|-------|------|------|-----------|----------------------|
| CH    | DNA       | LOC | REF | ALT | Amino | AA_R | AA_L  | SCN Index     | SCN Index Prediction | CH    | DNA      | LOC | REF | ALT | Amino | AA_R | AA_L  | SCN Index     | SCN Index Prediction | CH    | DNA | LOC      | REF | ALT | Amino | AA_R | AA_L | SCN Index | SCN Index Prediction |
| SCN2A | 166903842 | T   | C   | 284 | N     | S    | 0.682 | Likely Benign |                      | SCN2A | 16616991 | T   | G   | 286 | S     | P    | 0.23  | Likely Benign |                      | SCN2A | 12  | 52093500 | C   | A   | 285   | P    | T    | 0.598     | Likely Benign        |
| SCN2A | 166903842 | T   | C   | 284 | N     | S    | 0.309 | Likely Benign |                      | SCN2A | 16616991 | T   | G   | 286 | S     | A    | 0.164 | Likely Benign |                      | SCN2A | 12  | 52093500 | C   | G   | 285   | P    | A    | 0.672     | Likely Benign        |
| SCN2A | 166903842 | T   | C   | 284 | N     | S    | 0.384 | Likely Benign |                      | SCN2A | 16616991 | T   | G   | 286 | S     | A    | 0.178 | Likely Benign |                      | SCN2A | 12  | 52093500 | C   | G   | 285   | P    | A    | 0.672     | Likely Benign        |
| SCN2A | 166903841 | A   | C   | 284 | N     | K    | 0.389 | Likely Benign |                      | SCN2A | 16616992 | C   | G   | 286 | S     | C    | 0.218 | Likely Benign |                      | SCN2A | 12  | 52093501 | A   | C   | 285   | P    | H    | 0.866     | Likely Pathogenic    |
| SCN2A | 166903841 | A   | C   | 284 | N     | K    | 0.389 | Likely Benign |                      | SCN2A | 16616992 | C   | G   | 286 | S     | C    | 0.218 | Likely Benign |                      | SCN2A | 12  | 52093501 | A   | C   | 285   | P    | H    | 0.866     | Likely Pathogenic    |
| SCN2A | 166903840 | C   | A   | 285 | A     | S    | 0.388 | Likely Benign |                      | SCN2A | 16616994 | T   | A   | 287 | S     | T    | 0.104 | Likely Benign |                      | SCN2A | 12  | 52093501 | C   | T   | 285   | P    | L    | 0.825     | Likely Benign        |
| SCN2A | 166903840 | C   | G   | 285 | A     | P    | 0.221 | Likely Benign |                      | SCN2A | 16616995 | C   | T   | 287 | S     | P    | 0.268 | Likely Benign |                      | SCN2A | 12  | 52093503 | A   | C   | 286   | I    | L    | 0.077     | Likely Benign        |
| SCN2A | 166903840 | C   | G   | 285 | A     | P    | 0.221 | Likely Benign |                      | SCN2A | 16616995 | C   | T   | 287 | S     | P    | 0.268 | Likely Benign |                      | SCN2A | 12  | 52093503 | A   | C   | 286   | I    | L    | 0.077     | Likely Benign        |
| SCN2A | 166903839 | G   | A   | 285 | S     | C    | 0.152 | Likely Benign |                      | SCN2A | 16616995 | C   | A   | 287 | S     | Y    | 0.222 | Likely Benign |                      | SCN2A | 12  | 52093503 | A   | T   | 286   | I    | L    | 0.077     | Likely Benign        |
| SCN2A | 166903839 | G   | A   | 285 | S     | C    | 0.152 | Likely Benign |                      | SCN2A | 16616995 | C   | A   | 287 | S     | Y    | 0.222 | Likely Benign |                      | SCN2A | 12  | 52093504 | T   | G   | 286   | I    | R    | 0.270     | Likely Benign        |
| SCN2A | 166903839 | G   | A   | 285 | S     | C    | 0.152 | Likely Benign |                      | SCN2A | 16616995 | C   | T   | 287 | S     | P    | 0.268 | Likely Benign |                      | SCN2A | 12  | 52093504 | T   | G   | 286   | I    | R    | 0.270     | Likely Benign        |
| SCN2A | 166903837 | A   | C   | 286 | S     | A    | 0.191 | Likely Benign |                      | SCN2A | 16616997 | T   | G   | 288 | F     | V    | 0.12  | Likely Benign |                      | SCN2A | 12  | 52093506 | A   | C   | 287   | N    | H    | 0.213     | Likely Benign        |
| SCN2A | 166903837 | A   | C   | 286 | S     | A    | 0.191 | Likely Benign |                      | SCN2A | 16616997 | T   | G   | 288 | F     | V    | 0.12  | Likely Benign |                      | SCN2A | 12  | 52093506 | A   | C   | 287   | N    | H    | 0.213     | Likely Benign        |
| SCN2A | 166903837 | A   | C   | 286 | S     | A    | 0.191 | Likely Benign |                      | SCN2A | 16616997 | T   | G   | 288 | F     | V    | 0.12  | Likely Benign |                      | SCN2A | 12  | 52093506 | A   | C   | 287   | N    | H    | 0.213     | Likely Benign        |
| SCN2A | 166903836 | G   | C   | 286 | S     | C    | 0.506 | Likely Benign |                      | SCN2A | 16616998 | T   | G   | 288 | F     | S    | 0.12  | Likely Benign |                      | SCN2A | 12  | 52093506 | A   | T   | 287   | N    | Y    | 0.159     | Likely Benign        |
| SCN2A | 166903836 | G   | C   | 286 | S     | C    | 0.533 | Likely Benign |                      | SCN2A | 16616998 | T   | G   | 288 | F     | S    | 0.12  | Likely Benign |                      | SCN2A | 12  | 52093506 | A   | T   | 287   | N    | Y    | 0.159     | Likely Benign        |
| SCN2A | 166903836 | G   | C   | 286 | S     | C    | 0.533 | Likely Benign |                      | SCN2A | 16616998 | T   | G   | 288 | F     | S    | 0.12  | Likely Benign |                      | SCN2A | 12  | 52093506 | A   | T   | 287   | N    | Y    | 0.159     | Likely Benign        |

[illegible]







| GENE    | CHR | DNA_LOC   | REF. | ALT. | Amino | AA_R | AA_L | SCN Index | SCN Index Prediction | GENE  | CHR | DNA_LOC   | REF. | ALT. | Amino | AA_R | AA_L | SCN Index | SCN Index Prediction | GENE  | CHR | DNA_LOC   | REF. | ALT. | Amino | AA_R | AA_L | SCN Index | SCN Index Prediction |
|---------|-----|-----------|------|------|-------|------|------|-----------|----------------------|-------|-----|-----------|------|------|-------|------|------|-----------|----------------------|-------|-----|-----------|------|------|-------|------|------|-----------|----------------------|
| SCN2A   | 2   | 166903383 | G    | T    | 425   | A    | E    | 0.974     | Likely Pathogenic    | SCN2A | 2   | 166910509 | T    | T    | 425   | A    | E    | 0.807     | Likely Pathogenic    | SCN2A | 12  | 120993040 | C    | G    | 425   | A    | E    | 0.510     | Likely Benign        |
| SCN2A   | 2   | 166903381 | A    | C    | 426   | E    | D    | 0.979     | Likely Pathogenic    | SCN2A | 2   | 166910511 | A    | C    | 426   | M    | L    | 0.85      | Likely Pathogenic    | SCN2A | 12  | 120993940 | A    | G    | 425   | A    | G    | 0.876     | Likely Pathogenic    |
| SCN2A   | 2   | 166903382 | A    | C    | 426   | E    | D    | 0.979     | Likely Pathogenic    | SCN2A | 2   | 166910512 | A    | C    | 426   | M    | L    | 0.85      | Likely Pathogenic    | SCN2A | 12  | 120993940 | A    | G    | 425   | A    | G    | 0.876     | Likely Pathogenic    |
| SCN2A   | 2   | 166903380 | A    | C    | 426   | E    | N    | 0.978     | Likely Pathogenic    | SCN2A | 2   | 166910511 | A    | T    | 426   | M    | L    | 0.857     | Likely Pathogenic    | SCN2A | 12  | 120993942 | A    | G    | 426   | E    | K    | 0.202     | Likely Benign        |
| SCN2A   | 2   | 166903380 | A    | C    | 426   | E    | Y    | 0.978     | Likely Pathogenic    | SCN2A | 2   | 166910511 | A    | T    | 426   | M    | L    | 0.857     | Likely Pathogenic    | SCN2A | 12  | 120993942 | A    | G    | 426   | E    | K    | 0.202     | Likely Benign        |
| SCN2A   | 2   | 166903380 | A    | C    | 426   | E    | Y    | 0.978     | Likely Pathogenic    | SCN2A | 2   | 166910512 | A    | T    | 426   | M    | L    | 0.857     | Likely Pathogenic    | SCN2A | 12  | 120993943 | A    | G    | 426   | E    | A    | 0.174     | Likely Benign        |
| SCN2A   | 2   | 166903380 | A    | C    | 426   | E    | Y    | 0.978     | Likely Pathogenic    | SCN2A | 2   | 166910512 | A    | T    | 426   | M    | L    | 0.857     | Likely Pathogenic    | SCN2A | 12  | 120993943 | A    | G    | 426   | E    | A    | 0.174     | Likely Benign        |
| SCN2A   | 2   | 166903380 | A    | C    | 426   | E    | Y    | 0.978     | Likely Pathogenic    | SCN2A | 2   | 166910512 | A    | T    | 426   | M    | L    | 0.857     | Likely Pathogenic    | SCN2A | 12  | 120993943 | A    | G    | 426   | E    | A    | 0.174     | Likely Benign        |
| SCN2A   | 2   | 166903380 | A    | C    | 426   | E    | Y    | 0.978     | Likely Pathogenic    | SCN2A | 2   | 166910512 | A    | T    | 426   | M    | L    | 0.857     | Likely Pathogenic    | SCN2A | 12  | 120993943 | A    | G    | 426   | E    | A    | 0.174     | Likely Benign        |
| SCN2A   | 2   | 166903380 | A    | C    | 426   | E    | Y    | 0.978     | Likely Pathogenic    | SCN2A | 2   | 166910512 | A    | T    | 426   | M    | L    | 0.857     | Likely Pathogenic    | SCN2A | 12  | 120993943 | A    | G    | 426   | E    | A    | 0.174     | Likely Benign        |
| SCN2A   | 2   | 166903380 | A    | C    | 426   | E    | Y    | 0.978     | Likely Pathogenic    | SCN2A | 2   | 166910512 | A    | T    | 426   | M    | L    | 0.857     | Likely Pathogenic    | SCN2A | 12  | 120993943 | A    | G    | 426   | E    | A    | 0.174     | Likely Benign        |
| SCN2A   | 2   | 166903380 | A    | C    | 426   | E    | Y    | 0.978     | Likely Pathogenic    | SCN2A | 2   | 166910512 | A    | T    | 426   | M    | L    | 0.857     | Likely Pathogenic    | SCN2A | 12  | 120993943 | A    | G    | 426   | E    | A    | 0.174     | Likely Benign        |
| SCN2A   | 2   | 166903380 | A    | C    | 426   | E    | Y    | 0.978     | Likely Pathogenic    | SCN2A | 2   | 166910512 | A    | T    | 426   | M    | L    | 0.857     | Likely Pathogenic    | SCN2A | 12  | 120993943 | A    | G    | 426   | E    | A    | 0.174     | Likely Benign        |
| SCN2A   | 2   | 166903380 | A    | C    | 426   | E    | Y    | 0.978     | Likely Pathogenic    | SCN2A | 2   | 166910512 | A    | T    | 426   | M    | L    | 0.857     | Likely Pathogenic    | SCN2A | 12  | 120993943 | A    | G    | 426   | E    | A    | 0.174     | Likely Benign        |
| SCN2A   | 2   | 166903380 | A    | C    | 426   | E    | Y    | 0.978     | Likely Pathogenic    | SCN2A | 2   | 166910512 | A    | T    | 426   | M    | L    | 0.857     | Likely Pathogenic    | SCN2A | 12  | 120993943 | A    | G    | 426   | E    | A    | 0.174     | Likely Benign        |
| SCN2A   | 2   | 166903380 | A    | C    | 426   | E    | Y    | 0.978     | Likely Pathogenic    | SCN2A | 2   | 166910512 | A    | T    | 426   | M    | L    | 0.857     | Likely Pathogenic    | SCN2A | 12  | 120993943 | A    | G    | 426   | E    | A    | 0.174     | Likely Benign        |
| SCN2A   | 2   | 166903380 | A    | C    | 426   | E    | Y    | 0.978     | Likely Pathogenic    | SCN2A | 2   | 166910512 | A    | T    | 426   | M    | L    | 0.857     | Likely Pathogenic    | SCN2A | 12  | 120993943 | A    | G    | 426   | E    | A    | 0.174     | Likely Benign        |
| SCN2A   | 2   | 166903380 | A    | C    | 426   | E    | Y    | 0.978     | Likely Pathogenic    | SCN2A | 2   | 166910512 | A    | T    | 426   | M    | L    | 0.857     | Likely Pathogenic    | SCN2A | 12  | 120993943 | A    | G    | 426   | E    | A    | 0.174     | Likely Benign        |
| SCN2A   | 2   | 166903380 | A    | C    | 426   | E    | Y    | 0.978     | Likely Pathogenic    | SCN2A | 2   | 166910512 | A    | T    | 426   | M    | L    | 0.857     | Likely Pathogenic    | SCN2A | 12  | 120993943 | A    | G    | 426   | E    | A    | 0.174     | Likely Benign        |
| SCN2A   | 2   | 166903380 | A    | C    | 426   | E    | Y    | 0.978     | Likely Pathogenic    | SCN2A | 2   | 166910512 | A    | T    | 426   | M    | L    | 0.857     | Likely Pathogenic    | SCN2A | 12  | 120993943 | A    | G    | 426   | E    | A    | 0.174     | Likely Benign        |
| SCN2A   | 2   | 166903380 | A    | C    | 426   | E    | Y    | 0.978     | Likely Pathogenic    | SCN2A | 2   | 166910512 | A    | T    | 426   | M    | L    | 0.857     | Likely Pathogenic    | SCN2A | 12  | 120993943 | A    | G    | 426   | E    | A    | 0.174     | Likely Benign        |
| SCN2A   | 2   | 166903380 | A    | C    | 426   | E    | Y    | 0.978     | Likely Pathogenic    | SCN2A | 2   | 166910512 | A    | T    | 426   | M    | L    | 0.857     | Likely Pathogenic    | SCN2A | 12  | 120993943 | A    | G    | 426   | E    | A    | 0.174     | Likely Benign        |
| SCN2A   | 2   | 166903380 | A    | C    | 426   | E    | Y    | 0.978     | Likely Pathogenic    | SCN2A | 2   | 166910512 | A    | T    | 426   | M    | L    | 0.857     | Likely Pathogenic    | SCN2A | 12  | 120993943 | A    | G    | 426   | E    | A    | 0.174     | Likely Benign        |
| SCN2A   | 2   | 166903380 | A    | C    | 426   | E    | Y    | 0.978     | Likely Pathogenic    | SCN2A | 2   | 166910512 | A    | T    | 426   | M    | L    | 0.857     | Likely Pathogenic    | SCN2A | 12  | 120993943 | A    | G    | 426   | E    | A    | 0.174     | Likely Benign        |
| SCN2A   | 2   | 166903380 | A    | C    | 426   | E    | Y    | 0.978     | Likely Pathogenic    | SCN2A | 2   | 166910512 | A    | T    | 426   | M    | L    | 0.857     | Likely Pathogenic    | SCN2A | 12  | 120993943 | A    | G    | 426   | E    | A    | 0.174     | Likely Benign        |
| SCN2A   | 2   | 166903380 | A    | C    | 426   | E    | Y    | 0.978     | Likely Pathogenic    | SCN2A | 2   | 166910512 | A    | T    | 426   | M    | L    | 0.857     | Likely Pathogenic    | SCN2A | 12  | 120993943 | A    | G    | 426   | E    | A    | 0.174     | Likely Benign        |
| SCN2A   | 2   | 166903380 | A    | C    | 426   | E    | Y    | 0.978     | Likely Pathogenic    | SCN2A | 2   | 166910512 | A    | T    | 426   | M    | L    | 0.857     | Likely Pathogenic    | SCN2A | 12  | 120993943 | A    | G    | 426   | E    | A    | 0.174     | Likely Benign        |
| SCN2A   | 2   | 166903380 | A    | C    | 426   | E    | Y    | 0.978     | Likely Pathogenic    | SCN2A | 2   | 166910512 | A    | T    | 426   | M    | L    | 0.857     | Likely Pathogenic    | SCN2A | 12  | 120993943 | A    | G    | 426   | E    | A    | 0.174     | Likely Benign        |
| SCN2A   | 2   | 166903380 | A    | C    | 426   | E    | Y    | 0.978     | Likely Pathogenic    | SCN2A | 2   | 166910512 | A    | T    | 426   | M    | L    | 0.857     | Likely Pathogenic    | SCN2A | 12  | 120993943 | A    | G    | 426   | E    | A    | 0.174     | Likely Benign        |
| SCN2A   | 2   | 166903380 | A    | C    | 426   | E    | Y    | 0.978     | Likely Pathogenic    | SCN2A | 2   | 166910512 | A    | T    | 426   | M    | L    | 0.857     | Likely Pathogenic    | SCN2A | 12  | 120993943 | A    | G    | 426   | E    | A    | 0.174     | Likely Benign        |
| SCN2A   | 2   | 166903380 | A    | C    | 426   | E    | Y    | 0.978     | Likely Pathogenic    | SCN2A | 2   | 166910512 | A    | T    | 426   | M    | L    | 0.857     | Likely Pathogenic    | SCN2A | 12  | 120993943 | A    | G    | 426   | E    | A    | 0.174     | Likely Benign        |
| SCN2A   | 2   | 166903380 | A    | C    | 426   | E    | Y    | 0.978     | Likely Pathogenic    | SCN2A | 2   | 166910512 | A    | T    | 426   | M    | L    | 0.857     | Likely Pathogenic    | SCN2A | 12  | 120993943 | A    | G    | 426   | E    | A    | 0.174     | Likely Benign        |
| SCN2A   | 2   | 166903380 | A    | C    | 426   | E    | Y    | 0.978     | Likely Pathogenic    | SCN2A | 2   | 166910512 | A    | T    | 426   | M    | L    | 0.857     | Likely Pathogenic    | SCN2A | 12  | 120993943 | A    | G    | 426   | E    | A    | 0.174     | Likely Benign        |
| SCN2A   | 2   | 166903380 | A    | C    | 426   | E    | Y    | 0.978     | Likely Pathogenic    | SCN2A | 2   | 166910512 | A    | T    | 426   | M    | L    | 0.857     | Likely Pathogenic    | SCN2A | 12  | 120993943 | A    | G    | 426   | E    | A    | 0.174     | Likely Benign        |
| SCN2A   | 2   | 166903380 | A    | C    | 426   | E    | Y    | 0.978     | Likely Pathogenic    | SCN2A | 2   | 166910512 | A    | T    | 426   | M    | L    | 0.857     | Likely Pathogenic    | SCN2A | 12  | 120993943 | A    | G    | 426   | E    | A    | 0.174     | Likely Benign        |
| SCN2A   | 2   | 166903380 | A    | C    | 426   | E    | Y    | 0.978     | Likely Pathogenic    | SCN2A | 2   | 166910512 | A    | T    | 426   | M    | L    | 0.857     | Likely Pathogenic    | SCN2A | 12  | 120993943 | A    | G    | 426   | E    | A    | 0.174     | Likely Benign        |
| SCN2A   | 2   | 166903380 | A    | C    | 426   | E    | Y    | 0.978     | Likely Pathogenic    | SCN2A | 2   | 166910512 | A    | T    | 426   | M    | L    | 0.857     | Likely Pathogenic    | SCN2A | 12  | 120993943 | A    | G    | 426   | E    | A    | 0.174     | Likely Benign        |
| SCN2A   | 2   | 166903380 | A    | C    | 426   | E    | Y    | 0.978     | Likely Pathogenic    | SCN2A | 2   | 166910512 | A    | T    | 426   | M    | L    | 0.857     | Likely Pathogenic    | SCN2A | 12  | 120993943 | A    | G    | 426   | E    | A    | 0.174     | Likely Benign        |
| SCN2A   | 2   | 166903380 | A    | C    | 426   | E    | Y    | 0.978     | Likely Pathogenic    | SCN2A | 2   | 166910512 | A    | T    | 426   | M    | L    | 0.857     | Likely Pathogenic    | SCN2A | 12  | 120993943 | A    | G    | 426   | E    | A    | 0.174     | Likely Benign        |
| SCN2A   | 2   | 166903380 | A    | C    | 426   | E    | Y    | 0.978     | Likely Pathogenic    | SCN2A | 2   | 166910512 | A    | T    | 426   | M    | L    | 0.857     | Likely Pathogenic    | SCN2A | 12  | 120993943 | A    | G    | 426   | E    | A    | 0.174     | Likely Benign        |
| SCN2A   | 2   | 166903380 | A    | C    | 426   | E    | Y    | 0.978     | Likely Pathogenic    | SCN2A | 2   | 166910512 | A    | T    | 426   | M    | L    | 0.857     | Likely Pathogenic    | SCN2A | 12  | 120993943 | A    | G    | 426   | E    | A    | 0.174     | Likely Benign        |
| SCN2A   | 2   | 166903380 | A    | C    | 426   | E    | Y    | 0.978     | Likely Pathogenic    | SCN2A | 2   | 166910512 | A    | T    | 426   | M    | L    | 0.857     | Likely Pathogenic    | SCN2A | 12  | 120993943 | A    | G    | 426   | E    | A    | 0.174     | Likely Benign        |
| SCN2A   | 2   | 166903380 | A    | C    | 426   | E    | Y    | 0.978     | Likely Pathogenic    | SCN2A | 2   | 166910512 | A    | T    | 426   | M    | L    | 0.857     | Likely Pathogenic    | SCN2A | 12  | 120993943 | A    | G    | 426   | E    | A    | 0.174     | Likely Benign        |
| SCN2A   | 2   | 166903380 | A    | C    | 426   | E    | Y    | 0.978     | Likely Pathogenic    | SCN2A | 2   | 166910512 | A    | T    | 426   | M    | L    | 0.857     | Likely Pathogenic    | SCN2A | 12  | 120993943 | A    | G    | 426   | E    | A    | 0.174     | Likely Benign        |
| SCN2A   | 2   | 166903380 | A    | C    | 426   | E    | Y    | 0.978     | Likely Pathogenic    | SCN2A | 2   | 166910512 | A    | T    | 426   | M    | L    | 0.857     | Likely Pathogenic    | SCN2A | 12  | 120993943 | A    | G    | 426   | E    | A    | 0.174     | Likely Benign        |
| SCN2A   | 2   | 166903380 | A    | C    | 426   | E    | Y    | 0.978     | Likely Pathogenic    | SCN2A | 2   | 166910512 | A    | T    | 426   | M    | L    | 0.857     | Likely Pathogenic    | SCN2A | 12  | 120993943 | A    | G    | 426   | E    | A    | 0.174     | Likely Benign        |
| SCN2A   | 2   | 166903380 | A    | C    | 426   | E    | Y    | 0.978     | Likely Pathogenic    | SCN2A | 2   | 166910512 | A    | T    | 426   | M    | L    | 0.857     | Likely Pathogenic    | SCN2A | 12  | 120993943 | A    | G    | 426   | E    | A    | 0.174     | Likely Benign        |
| SCN2A   | 2   | 166903380 | A    | C    | 426   | E    | Y    | 0.978     | Likely Pathogenic    | SCN2A | 2   | 166910512 | A    | T    | 426   | M    | L    | 0.857     | Likely Pathogenic    | SCN2A | 12  | 120993943 | A    | G    | 426   | E    | A    | 0.174     | Likely Benign        |
| SCN2A   | 2   | 166903380 | A    | C    | 426   | E    | Y    | 0.978     | Likely Pathogenic    | SCN2A | 2   | 166910512 | A    | T    | 426   | M    | L    | 0.857     | Likely Pathogenic    | SCN2A | 12  | 120993943 | A    | G    | 426   | E    | A    | 0.174     | Likely Benign        |
| SCN2A   | 2   | 166903380 | A    | C    | 426   | E    | Y    | 0.978     | Likely Pathogenic    | SCN2A | 2   | 166910512 | A    | T    | 426   | M    | L    | 0.857     | Likely Pathogenic    | SCN2A | 12  | 120993943 | A    | G    | 426   | E    | A    | 0.174     | Likely Benign        |
| SCN2A   | 2   | 166903380 | A    | C    | 426   | E    | Y    | 0.978     | Likely Pathogenic    | SCN2A | 2   | 166910512 | A    | T    | 426   | M    | L    | 0.857     | Likely Pathogenic    | SCN2A | 12  | 120993943 | A    | G    | 426   | E    | A    | 0.174     | Likely Benign        |
| SCN2A   | 2   | 166903380 | A    | C    | 426   | E    | Y    | 0.978     | Likely Pathogenic    | SCN2A | 2   | 166910512 | A    | T    | 426   | M    | L    | 0.857     | Likely Pathogenic    | SCN2A | 12  | 120993943 | A    | G    | 426   | E    | A    | 0.174     | Likely Benign        |
| SCN2A</ |     |           |      |      |       |      |      |           |                      |       |     |           |      |      |       |      |      |           |                      |       |     |           |      |      |       |      |      |           |                      |



| GENE  |     |           |      |     |     |    |       |               |               |           |                      |           |     | GENE    |      |     |       |               |               |       |          |           |                      |      |     |         |       | GENE          |                   |       |          |          |      |           |                      |      |       |               |                   |       |          | GENE     |       |      |      |           |                      |               |                   |  |  |  |  |  |  |
|-------|-----|-----------|------|-----|-----|----|-------|---------------|---------------|-----------|----------------------|-----------|-----|---------|------|-----|-------|---------------|---------------|-------|----------|-----------|----------------------|------|-----|---------|-------|---------------|-------------------|-------|----------|----------|------|-----------|----------------------|------|-------|---------------|-------------------|-------|----------|----------|-------|------|------|-----------|----------------------|---------------|-------------------|--|--|--|--|--|--|
| GENE  | CHR | DNA_LOC   | REF. | ALT | N   | NT | Amino | AA_R          | AA_A          | SCN Index | SCN Index Prediction | GENE      | CHR | DNA_LOC | REF. | ALT | N     | NT            | Amino         | AA_R  | AA_A     | SCN Index | SCN Index Prediction | GENE | CHR | DNA_LOC | REF.  | ALT           | N                 | NT    | Amino    | AA_R     | AA_A | SCN Index | SCN Index Prediction | GENE | CHR   | DNA_LOC       | REF.              | ALT   | N        | NT       | Amino | AA_R | AA_A | SCN Index | SCN Index Prediction |               |                   |  |  |  |  |  |  |
| SCN2A | 2   | 166901770 | C    | G   | 482 | F  | T     | 0.095         | Likely Benign | SCN2A     | 2                    | 166917042 | T   | A       | 482  | V   | F     | 0.123         | Likely Benign | SCN2A | 12       | 12100311  | C                    | G    | 483 | L       | V     | 0.220         | Likely Benign     | SCN2A | 12       | 12100311 | C    | G         | 483                  | L    | V     | 0.220         | Likely Benign     | SCN2A | 12       | 12100311 | C     | G    | 483  | L         | V                    | 0.220         | Likely Benign     |  |  |  |  |  |  |
| SCN2A | 2   | 166901770 | C    | T   | 482 | S  | N     | 0.095         | Likely Benign | SCN2A     | 2                    | 166917042 | T   | A       | 482  | V   | F     | 0.112         | Likely Benign | SCN2A | 12       | 12100311  | C                    | G    | 483 | L       | V     | 0.272         | Likely Benign     | SCN2A | 12       | 12100311 | C    | G         | 483                  | L    | V     | 0.272         | Likely Benign     | SCN2A | 12       | 12100311 | C     | G    | 483  | L         | V                    | 0.272         | Likely Benign     |  |  |  |  |  |  |
| SCN2A | 2   | 166901770 | C    | T   | 482 | S  | N     | 0.128         | Likely Benign | SCN2A     | 2                    | 166917042 | T   | A       | 482  | V   | F     | 0.196         | Likely Benign | SCN2A | 12       | 12100311  | C                    | G    | 483 | L       | V     | 0.407         | Likely Benign     | SCN2A | 12       | 12100311 | C    | G         | 483                  | L    | V     | 0.407         | Likely Benign     | SCN2A | 12       | 12100311 | C     | G    | 483  | L         | V                    | 0.407         | Likely Benign     |  |  |  |  |  |  |
| SCN2A | 2   | 166901769 | G    | T   | 482 | R  | 0.128 | Likely Benign | SCN2A         | 2         | 166917042            | T         | G   | 482     | V    | G   | 0.052 | Likely Benign | SCN2A         | 12    | 12100312 | T         | C                    | 483  | L   | P       | 0.212 | Likely Benign | SCN2A             | 12    | 12100312 | T        | C    | 483       | L                    | P    | 0.212 | Likely Benign | SCN2A             | 12    | 12100312 | T        | C     | 483  | L    | P         | 0.212                | Likely Benign |                   |  |  |  |  |  |  |
| SCN2A | 2   | 166901768 | A    | G   | 483 | A  | P     | 0.144         | Likely Benign | SCN2A     | 2                    | 166917044 | T   | G       | 483  | F   | V     | 0.1           | Likely Benign | SCN2A | 12       | 12100313  | A                    | G    | 484 | S       | R     | 0.434         | Likely Benign     | SCN2A | 12       | 12100313 | A    | G         | 484                  | S    | R     | 0.434         | Likely Benign     | SCN2A | 12       | 12100313 | A     | G    | 484  | S         | R                    | 0.434         | Likely Benign     |  |  |  |  |  |  |
| SCN2A | 2   | 166901768 | A    | G   | 483 | A  | P     | 0.855         | Likely Benign | SCN2A     | 2                    | 166917044 | T   | G       | 483  | F   | V     | 0.1           | Likely Benign | SCN2A | 12       | 12100313  | A                    | G    | 484 | S       | R     | 0.434         | Likely Benign     | SCN2A | 12       | 12100313 | A    | G         | 484                  | S    | R     | 0.434         | Likely Benign     | SCN2A | 12       | 12100313 | A     | G    | 484  | S         | R                    | 0.434         | Likely Benign     |  |  |  |  |  |  |
| SCN2A | 2   | 166901768 | A    | G   | 483 | A  | P     | 0.636         | Likely Benign | SCN2A     | 2                    | 166917045 | T   | G       | 483  | F   | V     | 0.1           | Likely Benign | SCN2A | 12       | 12100314  | A                    | G    | 484 | S       | R     | 0.824         | Likely Pathogenic | SCN2A | 12       | 12100314 | A    | G         | 484                  | S    | R     | 0.824         | Likely Pathogenic | SCN2A | 12       | 12100314 | A     | G    | 484  | S         | R                    | 0.824         | Likely Pathogenic |  |  |  |  |  |  |
| SCN2A | 2   | 166901765 | A    | C   | 484 | A  | S     | 0.008         | Likely Benign | SCN2A     | 2                    | 166917045 | T   | G       | 483  | F   | V     | 0.1           | Likely Benign | SCN2A | 12       | 12100315  | A                    | G    | 484 | S       | R     | 0.803         | Likely Benign     | SCN2A | 12       | 12100315 | A    | G         | 484                  | S    | R     | 0.803         | Likely Benign     | SCN2A | 12       | 12100315 | A     | G    | 484  | S         | R                    | 0.803         | Likely Benign     |  |  |  |  |  |  |
| SCN2A | 2   | 166901765 | A    | C   | 484 | A  | S     | 0.005         | Likely Benign | SCN2A     | 2                    | 166917045 | T   | G       | 483  | F   | S     | 0.088         | Likely Benign | SCN2A | 12       | 12100315  | A                    | G    | 484 | S       | R     | 0.713         | Likely Benign     | SCN2A | 12       | 12100315 | A    | G         | 484                  | S    | R     | 0.713         | Likely Benign     | SCN2A | 12       | 12100315 | A     | G    | 484  | S         | R                    | 0.713         | Likely Benign     |  |  |  |  |  |  |
| SCN2A | 2   | 166901765 | A    | C   | 484 | A  | S     | 0.006         | Likely Benign | SCN2A     | 2                    | 166917046 | T   | G       | 483  | F   | V     | 0.1           | Likely Benign | SCN2A | 12       | 12100315  | A                    | G    | 484 | S       | R     | 0.531         | Likely Benign     | SCN2A | 12       | 12100315 | A    | G         | 484                  | S    |       |               |                   |       |          |          |       |      |      |           |                      |               |                   |  |  |  |  |  |  |

| GENE  |           |     |     |       |      |      |           |                      |       | GENE      |     |         |     |     |       |       |               |           |                      | GENE |    |     |         |     |       |                   |      |      |           |                      |
|-------|-----------|-----|-----|-------|------|------|-----------|----------------------|-------|-----------|-----|---------|-----|-----|-------|-------|---------------|-----------|----------------------|------|----|-----|---------|-----|-------|-------------------|------|------|-----------|----------------------|
| CHR   | DNA_LOC   | REF | ALT | Amino | AA_R | AA_L | SCN Index | SCN Index Prediction | LT    | NT        | CHR | DNA_LOC | REF | ALT | Amino | AA_R  | AA_L          | SCN Index | SCN Index Prediction | T    | NT | CHR | DNA_LOC | REF | ALT   | Amino             | AA_R | AA_L | SCN Index | SCN Index Prediction |
| SCN2A | 166901866 | G   | T   | S110  | G    | C    | 0.241     | Likely Benign        | SCN2A | 166912727 | G   | T       | S10 | Q   | H     | 0.275 | Likely Benign | SCN2A     | 121200395            | G    | T  | S11 | D       | Y   | 0.816 | Likely Pathogenic |      |      |           |                      |
| SCN2A | 166901884 | G   | A   | 511   | G    | C    | 0.003     | Likely Benign        | SCN2A | 166912727 | G   | T       | S10 | Q   | H     | 0.275 | Likely Benign | SCN2A     | 121200396            | A    | T  | S11 | D       | A   | 0.671 | Likely Benign     |      |      |           |                      |
| SCN2A | 166901884 | G   | A   | 511   | G    | C    | 0.003     | Likely Benign        | SCN2A | 166912728 | A   | G       | S11 | K   | R     | 0.081 | Likely Benign | SCN2A     | 121200396            | A    | T  | S11 | D       | A   | 0.671 | Likely Benign     |      |      |           |                      |
| SCN2A | 166901884 | G   | A   | 511   | G    | C    | 0.003     | Likely Benign        | SCN2A | 166912728 | A   | G       | S11 | K   | R     | 0.081 | Likely Benign | SCN2A     | 121200397            | A    | T  | S11 | D       | V   | 0.834 | Likely Pathogenic |      |      |           |                      |
| SCN2A | 166901884 | G   | A   | 511   | G    | C    | 0.003     | Likely Benign        | SCN2A | 166912729 | A   | T       | S11 | K   | R     | 0.081 | Likely Benign | SCN2A     | 121200397            | T    | G  | S11 | D       | E   | 0.099 | Likely Benign     |      |      |           |                      |
| SCN2A | 166901884 | G   | A   | 511   | G    | C    | 0.003     | Likely Benign        | SCN2A | 166912730 | A   | T       | S11 | K   | R     | 0.081 | Likely Benign | SCN2A     | 121200398            | A    | T  | S12 | P       | T   | 0.076 | Likely Benign     |      |      |           |                      |
| SCN2A | 166901884 | G   | A   | 511   | G    | C    | 0.003     | Likely Benign        | SCN2A | 166912731 | A   | T       | S11 | K   | R     | 0.081 | Likely Benign | SCN2A     | 121200398            | C    | T  | S12 | P       | S   | 0.016 | Likely Benign     |      |      |           |                      |
| SCN2A | 166901884 | G   | A   | 511   | G    | C    | 0.003     | Likely Benign        | SCN2A | 166912732 | A   | T       | S12 | E   | Q     | 0.308 | Likely Benign | SCN2A     | 121200399            | C    | G  | S12 | P       | R   | 0.076 | Likely Benign     |      |      |           |                      |
| SCN2A | 166901884 | G   | A   | 511   | G    | C    | 0.003     | Likely Benign        | SCN2A | 166912733 | A   | T       | S12 | E   | Q     | 0.308 | Likely Benign | SCN2A     | 121200400            | C    | G  | S12 | P       | R   | 0.076 | Likely Benign     |      |      |           |                      |
| SCN2A | 166901884 | G   | A   | 511   | G    | C    | 0.003     | Likely Benign        | SCN2A | 166912734 | A   | T       | S12 | E   | Q     | 0.308 | Likely Benign | SCN2A     | 121200401            | C    | G  | S12 | P       | R   | 0.076 | Likely Benign     |      |      |           |                      |
| SCN2A | 166901884 | G   | A   | 511   | G    | C    | 0.003     | Likely Benign        | SCN2A | 166912735 | A   | T       | S12 | E   | Q     | 0.308 | Likely Benign | SCN2A     | 121200402            | C    | G  | S12 | P       | R   | 0.076 | Likely Benign     |      |      |           |                      |
| SCN2A | 166901884 | G   | A   | 511   | G    | C    | 0.003     | Likely Benign        | SCN2A | 166912736 | A   | T       | S12 | E   | Q     | 0.308 | Likely Benign | SCN2A     | 121200403            | C    | G  | S12 | P       | R   | 0.076 | Likely Benign     |      |      |           |                      |
| SCN2A | 166901884 | G   | A   | 511   | G    | C    | 0.003     | Likely Benign        | SCN2A | 166912737 | A   | T       | S12 | E   | Q     | 0.308 | Likely Benign | SCN2A     | 121200404            | C    | G  | S12 | P       | R   | 0.076 | Likely Benign     |      |      |           |                      |
| SCN2A | 166901884 | G   | A   | 511   | G    | C    | 0.003     | Likely Benign        | SCN2A | 166912738 | A   | T       | S12 | E   | Q     | 0.308 | Likely Benign | SCN2A     | 121200405            | C    | G  | S12 | P       | R   | 0.076 | Likely Benign     |      |      |           |                      |
| SCN2A | 166901884 | G   | A   | 511   | G    | C    | 0.003     | Likely Benign        | SCN2A | 166912739 | A   | T       | S12 | E   | Q     | 0.308 | Likely Benign | SCN2A     | 121200406            | C    | G  | S12 | P       | R   | 0.076 | Likely Benign     |      |      |           |                      |
| SCN2A | 166901884 | G   | A   | 511   | G    | C    | 0.003     | Likely Benign        | SCN2A | 166912740 | A   | T       | S12 | E   | Q     | 0.308 | Likely Benign | SCN2A     | 121200407            | C    | G  | S12 | P       | R   | 0.076 | Likely Benign     |      |      |           |                      |
| SCN2A | 166901884 | G   | A   | 511   | G    | C    | 0.003     | Likely Benign        | SCN2A | 166912741 | A   | T       | S12 | E   | Q     | 0.308 | Likely Benign | SCN2A     | 121200408            | C    | G  | S12 | P       | R   | 0.076 | Likely Benign     |      |      |           |                      |
| SCN2A | 166901884 | G   | A   | 511   | G    | C    | 0.003     | Likely Benign        | SCN2A | 166912742 | A   | T       | S12 | E   | Q     | 0.308 | Likely Benign | SCN2A     | 121200409            | C    | G  | S12 | P       | R   | 0.076 | Likely Benign     |      |      |           |                      |
| SCN2A |           |     |     |       |      |      |           |                      |       |           |     |         |     |     |       |       |               |           |                      |      |    |     |         |     |       |                   |      |      |           |                      |

| GENE  | CHR | DNA_LOC   | REF | ALT | Amino | AA_R | AA_L  | SCN Index     | SCN Index Prediction | GENE  | CHR   | DNA_LOC   | REF       | ALT | Amino | AA_R | AA_L  | SCN Index     | SCN Index Prediction | GENE          | CHR   | DNA_LOC   | REF       | ALT       | Amino | AA_R | AA_L | SCN Index | SCN Index Prediction |                   |
|-------|-----|-----------|-----|-----|-------|------|-------|---------------|----------------------|-------|-------|-----------|-----------|-----|-------|------|-------|---------------|----------------------|---------------|-------|-----------|-----------|-----------|-------|------|------|-----------|----------------------|-------------------|
| SCN2A | 2   | 166901605 | G   | A   | S37   | F    | 0.107 | Likely Benign |                      | SCN2A | 2     | 166912210 | T         | A   | S38   | R    | 0.198 | Likely Benign |                      | SCN2A         | 12    | 121001480 | A         | G         | S39   | K    | R    | 0.053     | Likely Benign        |                   |
| SCN2A | 2   | 166901605 | G   | C   | S37   | F    | 0.054 | Likely Benign |                      | SCN2A | 2     | 166912212 | T         | A   | S39   | F    | 0.327 | Likely Benign |                      | SCN2A         | 12    | 121004040 | A         | T         | S39   | K    | I    | 0.433     | Likely Benign        |                   |
| SCN2A | 2   | 166901605 | G   | T   | S37   | F    | 0.137 | Likely Benign |                      | SCN2A | 2     | 166912213 | T         | A   | S39   | F    | 0.142 | Likely Benign |                      | SCN2A         | 12    | 121004041 | A         | T         | S39   | K    | N    | 0.196     | Likely Benign        |                   |
| SCN2A | 2   | 166901603 | T   | A   | S38   | I    | 0.187 | Likely Benign |                      | SCN2A | 2     | 166912212 | T         | G   | S39   | V    | 0.35  | Likely Benign |                      | SCN2A         | 12    | 121004041 | A         | T         | S39   | K    | N    | 0.196     | Likely Benign        |                   |
| SCN2A | 2   | 166901603 | T   | G   | S38   | I    | 0.078 | Likely Benign |                      | SCN2A | 2     | 166912213 | T         | G   | S39   | F    | 0.39  | Likely Benign |                      | SCN2A         | 12    | 121004042 | A         | T         | S39   | K    | N    | 0.196     | Likely Benign        |                   |
| SCN2A | 2   | 166901602 | A   | C   | S38   | I    | 0.261 | Likely Benign |                      | SCN2A | 2     | 166912213 | T         | G   | S39   | F    | 0.391 | Likely Benign |                      | SCN2A         | 12    | 121004042 | A         | C         | S40   | F    | L    | 0.100     | Likely Benign        |                   |
| SCN2A | 2   | 166901602 | A   | T   | S38   | I    | 0.170 | Likely Benign |                      | SCN2A | 2     | 166912214 | T         | G   | S39   | F    | 0.405 | Likely Benign |                      | SCN2A         | 12    | 121004042 | A         | T         | S39   | K    | N    | 0.196     | Likely Benign        |                   |
| SCN2A | 2   | 166901601 | C   | G   | S38   | I    | 0.052 | Likely Benign |                      | SCN2A | 2     | 166912214 | T         | G   | S39   | F    | 0.415 | Likely Benign |                      | SCN2A         | 12    | 121004043 | A         | T         | S39   | K    | N    | 0.196     | Likely Benign        |                   |
| SCN2A | 2   | 166901600 | C   | G   | S39   | E    | 0.167 | Likely Benign |                      | SCN2A | 2     | 166912215 | T         | G   | S40   | S    | 0.273 | Likely Benign |                      | SCN2A         | 12    | 121004044 | A         | T         | S40   | F    | L    | 0.089     | Likely Benign        |                   |
| SCN2A | 2   | 166901600 | C   | T   | S39   | E    | 0.050 | Likely Benign |                      | SCN2A | 2     | 166912215 | T         | G   | S40   | S    | 0.282 | Likely Benign |                      | SCN2A         | 12    | 121004044 | A         | T         | S40   | F    | L    | 0.061     | Likely Benign        |                   |
| SCN2A | 2   | 166901599 | T   | C   | S39   | E    | 0.054 | Likely Benign |                      | SCN2A | 2     | 166912216 | T         | G   | S40   | S    | 0.297 | Likely Benign |                      | SCN2A         | 12    | 121004045 | A         | T         | S40   | F    | L    | 0.089     | Likely Benign        |                   |
| SCN2A | 2   | 166901599 | T   | C   | S39   | E    | 0.054 | Likely Benign |                      | SCN2A | 2     | 166912216 | T         | G   | S40   | S    | 0.304 | Likely Benign |                      | SCN2A         | 12    | 121004045 | A         | T         | S40   | F    | L    | 0.089     | Likely Benign        |                   |
| SCN2A | 2   | 166901598 | T   | A   | S39   | E    | 0.032 | Likely Benign |                      | SCN2A | 2     | 166912217 | T         | A   | S41   | L    | M     | 0.176         | Likely Benign        |               | SCN2A | 12        | 121004046 | A         | C     | S41  | S    | Y         | 0.793                | Likely Pathogenic |
| SCN2A | 2   | 166901598 | T   | A   | S39   | E    | 0.032 | Likely Benign |                      | SCN2A | 2     | 166912218 | T         | A   | S41   | L    | M     | 0.176         | Likely Benign        |               | SCN2A | 12        | 121004046 | A         | C     | S41  | S    | Y         | 0.793                | Likely Pathogenic |
| SCN2A | 2   | 166901597 | T   | G   | S39   | E    | 0.017 | Likely Benign |                      | SCN2A | 2     | 166912219 | T         | G   | S41   | L    | W     | 0.097         | Likely Benign        |               | SCN2A | 12        | 121004046 | A         | C     | S41  | S    | Y         | 0.793                | Likely Pathogenic |
| SCN2A | 2   | 166901597 | T   | G   | S39   | E    | 0.017 | Likely Benign |                      | SCN2A | 2     | 166912220 | T         | G   | S41   | L    | W     | 0.097         | Likely Benign        |               | SCN2A | 12        | 121004046 | A         | C     | S41  | S    | Y         | 0.793                | Likely Pathogenic |
| SCN2A | 2   | 166901597 | C   | G   | S40   | G    | R     | 0.751         | Likely Benign        |       | SCN2A | 2         | 166912220 | T   | G     | S41  | L     | W             | 0.097                | Likely Benign |       | SCN2A     | 12        | 121004046 | A     | C    | S41  | S</       |                      |                   |

| GENE  |     |           |      |      |       |      |       |                   |                      | GENE |       |      |           |         |      |      |       |       |               | GENE      |                      |       |    |           |     |         |      |      |       | GENE  |                   |           |                      |       |    |           |     |         |      |      |       |       |                   |           |                      |    |    |
|-------|-----|-----------|------|------|-------|------|-------|-------------------|----------------------|------|-------|------|-----------|---------|------|------|-------|-------|---------------|-----------|----------------------|-------|----|-----------|-----|---------|------|------|-------|-------|-------------------|-----------|----------------------|-------|----|-----------|-----|---------|------|------|-------|-------|-------------------|-----------|----------------------|----|----|
| GENE  | CHR | DNA_LOC   | REF. | ALT. | Amino | AA_R | AA_L  | SCN Index         | SCN Index Prediction | LT   | NT    | GENE | CHR       | DNA_LOC | REF. | ALT. | Amino | AA_R  | AA_L          | SCN Index | SCN Index Prediction | LT    | NT | GENE      | CHR | DNA_LOC | REF. | ALT. | Amino | AA_R  | AA_L              | SCN Index | SCN Index Prediction | LT    | NT | GENE      | CHR | DNA_LOC | REF. | ALT. | Amino | AA_R  | AA_L              | SCN Index | SCN Index Prediction | LT | NT |
| SCN2A | 2   | 166900522 | C    | G    | 567   | R    | 0.951 | Likely Pathogenic |                      |      | SCN2A | 2    | 166179696 | T       | C    | 568  | S     | 0.204 | Likely Benign |           |                      | SCN2A | 12 | 121513932 | C   | G       | 566  | F    | R     | 0.718 | Likely Benign     |           |                      | SCN2A | 12 | 121513932 | C   | G       | 566  | F    | R     | 0.718 | Likely Benign     |           |                      |    |    |
| SCN2A | 2   | 166900522 | C    | G    | 567   | R    | 0.951 | Likely Pathogenic |                      |      | SCN2A | 2    | 166179696 | T       | C    | 568  | S     | 0.204 | Likely Benign |           |                      | SCN2A | 12 | 121513932 | C   | G       | 566  | F    | R     | 0.718 | Likely Benign     |           |                      | SCN2A | 12 | 121513932 | C   | G       | 566  | F    | R     | 0.718 | Likely Benign     |           |                      |    |    |
| SCN2A | 2   | 166900522 | C    | G    | 567   | R    | 0.951 | Likely Pathogenic |                      |      | SCN2A | 2    | 166179696 | T       | C    | 568  | S     | 0.204 | Likely Benign |           |                      | SCN2A | 12 | 121513932 | C   | G       | 566  | F    | R     | 0.718 | Likely Benign     |           |                      | SCN2A | 12 | 121513932 | C   | G       | 566  | F    | R     | 0.718 | Likely Benign     |           |                      |    |    |
| SCN2A | 2   | 166900522 | C    | G    | 567   | R    | 0.951 | Likely Pathogenic |                      |      | SCN2A | 2    | 166179696 | T       | C    | 568  | S     | 0.204 | Likely Benign |           |                      | SCN2A | 12 | 121513932 | C   | G       | 566  | F    | R     | 0.718 | Likely Benign     |           |                      | SCN2A | 12 | 121513932 | C   | G       | 566  | F    | R     | 0.718 | Likely Benign     |           |                      |    |    |
| SCN2A | 2   | 166900519 | C    | A    | 568   | R    | 0.889 | Likely Pathogenic |                      |      | SCN2A | 2    | 166179697 | T       | C    | 568  | S     | 0.208 | Likely Benign |           |                      | SCN2A | 12 | 121513933 | A   | T       | 567  | S    | R     | 0.903 | Likely Pathogenic |           |                      | SCN2A | 12 | 121513933 | A   | T       | 567  | S    | R     | 0.903 | Likely Pathogenic |           |                      |    |    |
| SCN2A | 2   | 166900519 | C    | A    | 568   | R    | 0.889 | Likely Pathogenic |                      |      | SCN2A | 2    | 166179697 | T       | C    | 568  | S     | 0.208 | Likely Benign |           |                      | SCN2A | 12 | 121513933 | A   | T       | 567  | S    | R     | 0.903 | Likely Pathogenic |           |                      | SCN2A | 12 | 121513933 | A   | T       | 567  | S    | R     | 0.903 | Likely Pathogenic |           |                      |    |    |
| SCN2A | 2   | 166900519 | C    | A    | 568   | R    | 0.889 | Likely Pathogenic |                      |      | SCN2A | 2    | 166179697 | T       | C    | 568  | S     | 0.208 | Likely Benign |           |                      | SCN2A | 12 | 121513933 | A   | T       | 567  | S    | R     | 0.903 | Likely Pathogenic |           |                      | SCN2A | 12 | 121513933 | A   | T       | 567  | S    | R     | 0.903 | Likely Pathogenic |           |                      |    |    |
| SCN2A | 2   | 166900519 | C    | A    | 568   | R    | 0.889 | Likely Pathogenic |                      |      | SCN2A | 2    | 166179697 | T       | C    | 568  | S     | 0.208 | Likely Benign |           |                      | SCN2A | 12 | 121513933 | A   | T       | 567  | S    | R     | 0.903 | Likely Pathogenic |           |                      | SCN2A | 12 | 121513933 | A   | T       | 567  | S    | R     | 0.903 | Likely Pathogenic |           |                      |    |    |
| SCN2A | 2   | 166900517 | T    | A    | 569   | N    | 0.278 | Likely Benign     |                      |      | SCN2A | 2    | 166179700 | C       | G    | 569  | P     | 0.1   | Likely Benign |           |                      | SCN2A | 12 | 121513935 | T   | G       | 567  | S    | R     | 0.847 | Likely Pathogenic |           |                      | SCN2A | 12 | 121513935 | T   | G       | 567  | S    | R     | 0.847 | Likely Pathogenic |           |                      |    |    |
| SCN2A | 2   | 166900517 | T    | A    | 569   | N    | 0.278 | Likely Benign     |                      |      | SCN2A | 2    | 166179700 | C       | G    | 569  | P     | 0.1   | Likely Benign |           |                      | SCN2A | 12 | 121513935 | T   | G       | 567  | S    | R     | 0.847 | Likely Pathogenic |           |                      | SCN2A | 12 | 121513935 | T   | G       | 567  | S    | R     | 0.847 | Likely Pathogenic |           |                      |    |    |
| SCN2A | 2   | 166900517 | T    | A    | 569   | N    | 0.278 | Likely Benign     |                      |      | SCN2A | 2    | 166179700 | C       | G    | 569  | P     | 0.1   | Likely Benign |           |                      | SCN2A | 12 | 121513935 | T   | G       | 567  | S    | R     | 0.847 | Likely Pathogenic |           |                      | SCN2A | 12 | 121513935 | T   | G       | 567  | S    | R     | 0.847 | Likely Pathogenic |           |                      |    |    |
| SCN2A | 2   | 166900516 | T    | A    | 569   | N    | 0.173 | Likely Benign     |                      |      |       |      |           |         |      |      |       |       |               |           |                      |       |    |           |     |         |      |      |       |       |                   |           |                      |       |    |           |     |         |      |      |       |       |                   |           |                      |    |    |





[illegible]







| GENE  | CHR | DNA_LOC   | REF. | ALT. | Amino | AA_R | AA_L | SCN Index | SCN Index Prediction | GENE  | CHR | DNA_LOC   | REF. | ALT. | Amino | AA_R | AA_L | SCN Index | SCN Index Prediction | GENE  | CHR | DNA_LOC   | REF. | ALT. | Amino | AA_R | AA_L | SCN Index | SCN Index Prediction |
|-------|-----|-----------|------|------|-------|------|------|-----------|----------------------|-------|-----|-----------|------|------|-------|------|------|-----------|----------------------|-------|-----|-----------|------|------|-------|------|------|-----------|----------------------|
| SCN2A | 2   | 166897865 | A    | T    | 764   | V    | D    | 0.886     | Likely Pathogenic    | SCN2A | 2   | 16619777  | C    | G    | 763   | L    | M    | 0.946     | Likely Pathogenic    | SCN2A | 12  | 121453298 | T    | G    | 764   | V    | G    | 0.970     | Likely Pathogenic    |
| SCN2A | 2   | 166897863 | C    | A    | 765   | L    | L    | 0.986     | Likely Pathogenic    | SCN2A | 2   | 166197977 | C    | G    | 763   | L    | V    | 0.912     | Likely Pathogenic    | SCN2A | 12  | 121453300 | C    | A    | 765   | L    | M    | 0.891     | Likely Pathogenic    |
| SCN2A | 2   | 166897862 | C    | G    | 765   | V    | L    | 0.985     | Likely Pathogenic    | SCN2A | 2   | 166197975 | C    | G    | 763   | L    | V    | 0.912     | Likely Pathogenic    | SCN2A | 12  | 121453300 | C    | A    | 765   | L    | M    | 0.890     | Likely Pathogenic    |
| SCN2A | 2   | 166897862 | C    | T    | 765   | V    | M    | 0.968     | Likely Pathogenic    | SCN2A | 2   | 166197978 | T    | C    | 763   | L    | P    | 0.98      | Likely Pathogenic    | SCN2A | 12  | 121453001 | T    | A    | 765   | L    | Q    | 0.977     | Likely Pathogenic    |
| SCN2A | 2   | 166897862 | C    | G    | 765   | V    | A    | 0.987     | Likely Pathogenic    | SCN2A | 2   | 166197979 | C    | G    | 763   | L    | P    | 0.98      | Likely Pathogenic    | SCN2A | 12  | 121453001 | T    | A    | 765   | L    | Q    | 0.977     | Likely Pathogenic    |
| SCN2A | 2   | 166897862 | C    | G    | 765   | V    | A    | 0.987     | Likely Pathogenic    | SCN2A | 2   | 166197980 | C    | G    | 764   | A    | P    | 0.66      | Likely Benign        | SCN2A | 12  | 121453001 | T    | A    | 765   | L    | Q    | 0.977     | Likely Pathogenic    |
| SCN2A | 2   | 166897862 | C    | T    | 765   | V    | A    | 0.987     | Likely Pathogenic    | SCN2A | 2   | 166197981 | C    | G    | 764   | A    | P    | 0.66      | Likely Benign        | SCN2A | 12  | 121453001 | T    | A    | 765   | L    | Q    | 0.977     | Likely Pathogenic    |
| SCN2A | 2   | 166897859 | A    | G    | 766   | M    | R    | 0.820     | Likely Pathogenic    | SCN2A | 2   | 166197981 | C    | G    | 764   | A    | P    | 0.66      | Likely Benign        | SCN2A | 12  | 121453001 | T    | A    | 765   | L    | Q    | 0.977     | Likely Pathogenic    |
| SCN2A | 2   | 166897859 | A    | G    | 766   | M    | R    | 0.820     | Likely Pathogenic    | SCN2A | 2   | 166197982 | C    | G    | 764   | A    | P    | 0.66      | Likely Benign        | SCN2A | 12  | 121453001 | T    | A    | 765   | L    | Q    | 0.977     | Likely Pathogenic    |
| SCN2A | 2   | 166897859 | A    | G    | 766   | M    | R    | 0.820     | Likely Pathogenic    | SCN2A | 2   | 166197983 | C    | T    | 764   | A    | V    | 0.719     | Likely Benign        | SCN2A | 12  | 121453001 | T    | A    | 765   | L    | Q    | 0.977     | Likely Pathogenic    |
| SCN2A | 2   | 166897858 | C    | A    | 766   | M    | I    | 0.976     | Likely Pathogenic    | SCN2A | 2   | 166197983 | C    | T    | 764   | A    | V    | 0.719     | Likely Benign        | SCN2A | 12  | 121453001 | T    | A    | 765   | L    | Q    | 0.977     | Likely Pathogenic    |
| SCN2A | 2   | 166897858 | C    | A    | 766   | M    | I    | 0.976     | Likely Pathogenic    | SCN2A | 2   | 166197983 | C    | T    | 764   | A    | V    | 0.719     | Likely Benign        | SCN2A | 12  | 121453001 | T    | A    | 765   | L    | Q    | 0.977     | Likely Pathogenic    |
| SCN2A | 2   | 166897858 | C    | A    | 766   | M    | I    | 0.976     | Likely Pathogenic    | SCN2A | 2   | 166197983 | C    | T    | 764   | A    | V    | 0.719     | Likely Benign        | SCN2A | 12  | 121453001 | T    | A    | 765   | L    | Q    | 0.977     | Likely Pathogenic    |
| SCN2A | 2   | 166897857 | C    | T    | 767   | D    | Y    | 0.987     | Likely Pathogenic    | SCN2A | 2   | 166197983 | C    | T    | 764   | A    | V    | 0.719     | Likely Benign        | SCN2A | 12  | 121453001 | T    | A    | 765   | L    | Q    | 0.977     | Likely Pathogenic    |
| SCN2A | 2   | 166897857 | C    | T    | 767   | D    | Y    | 0.987     | Likely Pathogenic    | SCN2A | 2   | 166197984 | C    | T    | 765   | I    | F    | 0.979     | Likely Pathogenic    | SCN2A | 12  | 121453001 | T    | A    | 765   | L    | Q    | 0.977     | Likely Pathogenic    |
| SCN2A | 2   | 166897857 | C    | T    | 767   | D    | Y    | 0.987     | Likely Pathogenic    | SCN2A | 2   | 166197984 | C    | T    | 765   | I    | F    | 0.979     | Likely Pathogenic    | SCN2A | 12  | 121453001 | T    | A    | 765   | L    | Q    | 0.977     | Likely Pathogenic    |
| SCN2A | 2   | 166897857 | C    | T    | 767   | D    | Y    | 0.987     | Likely Pathogenic    | SCN   |     |           |      |      |       |      |      |           |                      |       |     |           |      |      |       |      |      |           |                      |







| GENE  | CHR | DNA_LOC   | REF | ALT | Amino | AA_R | AA_L | SCN Index | SCN Index Prediction | GENE  | CHR | DNA_LOC   | REF | ALT | Amino | AA_R | AA_L | SCN Index | SCN Index Prediction |
|-------|-----|-----------|-----|-----|-------|------|------|-----------|----------------------|-------|-----|-----------|-----|-----|-------|------|------|-----------|----------------------|
| SCN2A | 2   | 166894600 | T   | A   | 878   | M    | L    | 0.472     | Likely Benign        | SCN2A | 2   | 166201260 | G   | C   | 875   | G    | A    | 0.864     | Likely Pathogenic    |
| SCN2A | 2   | 166894600 | T   | C   | 878   | M    | V    | 0.778     | Likely Benign        | SCN2A | 2   | 166201266 | G   | T   | 875   | G    | V    | 0.567     | Likely Pathogenic    |
| SCN2A | 2   | 166894600 | T   | C   | 878   | M    | V    | 0.778     | Likely Benign        | SCN2A | 2   | 166201272 | A   | C   | 876   | N    | H    | 0.374     | Likely Pathogenic    |
| SCN2A | 2   | 166894599 | A   | C   | 878   | M    | R    | 0.887     | Likely Pathogenic    | SCN2A | 2   | 166201228 | A   | G   | 876   | N    | D    | 0.556     | Likely Pathogenic    |
| SCN2A | 2   | 166894599 | A   | C   | 878   | M    | R    | 0.887     | Likely Pathogenic    | SCN2A | 2   | 166201234 | A   | C   | 876   | N    | H    | 0.374     | Likely Pathogenic    |
| SCN2A | 2   | 166894599 | A   | T   | 878   | M    | K    | 0.175     | Likely Benign        | SCN2A | 2   | 166201229 | A   | C   | 876   | N    | T    | 0.865     | Likely Pathogenic    |
| SCN2A | 2   | 166894598 | C   | G   | 878   | M    | I    | 0.476     | Likely Benign        | SCN2A | 2   | 166201129 | A   | G   | 876   | N    | S    | 0.944     | Likely Pathogenic    |
| SCN2A | 2   | 166894598 | C   | G   | 878   | M    | I    | 0.476     | Likely Benign        | SCN2A | 2   | 166201129 | A   | G   | 876   | N    | S    | 0.944     | Likely Pathogenic    |
| SCN2A | 2   | 166894597 | C   | T   | 879   | L    | I    | 0.992     | Likely Pathogenic    | SCN2A | 2   | 166201137 | T   | A   | 876   | N    | K    | 0.917     | Likely Pathogenic    |
| SCN2A | 2   | 166894596 | G   | T   | 879   | L    | I    | 0.992     | Likely Pathogenic    | SCN2A | 2   | 166201137 | T   | A   | 876   | N    | K    | 0.917     | Likely Pathogenic    |
| SCN2A | 2   | 166894596 | G   | T   | 879   | L    | I    | 0.992     | Likely Pathogenic    | SCN2A | 2   | 166201137 | T   | A   | 876   | N    | K    | 0.917     | Likely Pathogenic    |
| SCN2A | 2   | 166894596 | A   | T   | 879   | L    | Q    | 0.988     | Likely Pathogenic    | SCN2A | 2   | 166201132 | C   | A   | 877   | S    | Y    | 0.994     | Likely Pathogenic    |
| SCN2A | 2   | 166894596 | A   | T   | 879   | L    | Q    | 0.988     | Likely Pathogenic    | SCN2A | 2   | 166201132 | C   | A   | 877   | S    | Y    | 0.994     | Likely Pathogenic    |
| SCN2A | 2   | 166894594 | T   | C   | 880   | I    | V    | 0.622     | Likely Benign        | SCN2A | 2   | 166201132 | C   | T   | 877   | S    | F    | 0.993     | Likely Pathogenic    |
| SCN2A | 2   | 166894594 | T   | C   | 880   | I    | V    | 0.622     | Likely Benign        | SCN2A | 2   | 166201134 | G   | A   | 878   | V    | M    | 0.855     | Likely Pathogenic    |
| SCN2A | 2   | 166894593 | A   | G   | 880   | I    | L    | 0.622     | Likely Benign        | SCN2A | 2   | 166201134 | G   | T   | 878   | V    | L    | 0.66      | Likely Benign        |
| SCN2A | 2   | 166894593 | A   | G   | 880   | I    | L    | 0.622     | Likely Benign        | SCN2A | 2   | 166201135 | G   | T   | 878   | V    | L    | 0.66      | Likely Benign        |
| SCN2A | 2   | 166894592 | T   | C   | 880   | I    | M    | 0.985     | Likely Pathogenic    | SCN2A | 2   | 166201135 | G   | T   | 878   | V    | L    | 0.66      | Likely Benign        |
| SCN2A | 2   | 166894591 | T   | C   | 881   | K    | E    | 0.953     | Likely Pathogenic    | SCN2A | 2   | 166201135 | G   | T   | 878   | V    | L    | 0.66      | Likely Benign        |
| SCN2A | 2   | 166894591 | T   | C   | 881   | K    | E    | 0.953     | Likely Pathogenic    | SCN2A | 2   | 166201137 | G   | C   | 879   | G    | R    | 0.927     | Likely Pathogenic    |
| SCN2A | 2   | 166894590 | T   | C   | 881   | K    | M    | 0.974     | Likely Pathogenic    | SCN2A | 2   | 166201137 | G   | C   | 879   | G    | R    | 0.927     | Likely Pathogenic    |
| SCN2A | 2   | 166894590 | T   | C   | 881   | K    | M    | 0.974     | Likely Pathogenic    | SCN2A | 2   | 166201138 | G   | A   | 879   | G    | E    | 0.949     | Likely Pathogenic    |
| SCN2A | 2   | 166894589 | C   | A   | 881   | N    | S    | 0.959     | Likely Pathogenic    | SCN2A | 2   | 166201138 | G   | C   | 879   | G    | A    | 0.929     | Likely Pathogenic    |
| SCN2A | 2   | 166894589 | C   | A   | 881   | N    | S    | 0.959     | Likely Pathogenic    | SCN2A | 2   | 166201138 | G   | C   | 879   | G    | A    | 0.929     | Likely Pathogenic    |
| SCN2A | 2   | 166894588 | T   | A   | 882   | I    | F    | 0.989     | Likely Pathogenic    | SCN2A | 2   | 166201140 | G   | A   | 880   | A    |      |           |                      |









| GENE  | CHR | DNA LOC   | REF. ALT | Amino | AA R. AA A. | SCN Index | SCN Index Prediction | GENE  | CHR   | DNA LOC  | REF. ALT | Amino    | AA R. AA A. | SCN Index | SCN Index Prediction |       |       |       |       |
|-------|-----|-----------|----------|-------|-------------|-----------|----------------------|-------|-------|----------|----------|----------|-------------|-----------|----------------------|-------|-------|-------|-------|
| SCN2A | 2   | 166892944 | C        | G     | T           | 0.915     | 0.937                | SCN2A | 12    | 52162794 | A        | G        | T           | 0.106     | H                    | R     | 0.007 |       |       |
| SCN2A | 2   | 166892944 | C        | G     | T           | 0.105     | A                    | P     | 0.937 | SCN2A    | 12       | 52162794 | A           | G         | T                    | 0.106 | H     | L     | 0.016 |
| SCN2A | 2   | 166892944 | C        | G     | T           | 0.105     | A                    | T     | 0.917 | SCN2A    | 12       | 52162795 | A           | G         | T                    | 0.106 | H     | L     | 0.016 |
| SCN2A | 2   | 166892943 | C        | G     | T           | 0.105     | A                    | G     | 0.962 | SCN2A    | 12       | 52162795 | A           | G         | T                    | 0.106 | H     | Q     | 0.027 |
| SCN2A | 2   | 166892943 | C        | G     | T           | 0.105     | A                    | G     | 0.962 | SCN2A    | 12       | 52162796 | A           | G         | T                    | 0.107 | A     | P     | 0.032 |
| SCN2A | 2   | 166892941 | C        | G     | T           | 0.106     | V                    | L     | 0.051 | SCN2A    | 12       | 52162796 | A           | G         | T                    | 0.107 | A     | P     | 0.032 |
| SCN2A | 2   | 166892941 | C        | G     | T           | 0.106     | V                    | L     | 0.051 | SCN2A    | 12       | 52162796 | A           | G         | T                    | 0.107 | A     | S     | 0.014 |
| SCN2A | 2   | 166892941 | C        | G     | T           | 0.106     | V                    | L     | 0.051 | SCN2A    | 12       | 52162797 | A           | G         | T                    | 0.107 | A     | G     | 0.020 |
| SCN2A | 2   | 166892941 | C        | G     | T           | 0.106     | V                    | L     | 0.051 | SCN2A    | 12       | 52162797 | A           | G         | T                    | 0.107 | A     | G     | 0.020 |
| SCN2A | 2   | 166892940 | A        | T     | 0.107       | D         | Y                    | 0.073 | SCN2A | 12       | 52162799 | A        | T           | 0.108     | F                    | I     | 0.048 |       |       |
| SCN2A | 2   | 166892938 | C        | A     | T           | 0.107     | D                    | Y     | 0.073 | SCN2A    | 12       | 52162799 | A           | T         | 0.108                | F     | I     | 0.048 |       |
| SCN2A | 2   | 166892938 | C        | A     | T           | 0.107     | D                    | Y     | 0.073 | SCN2A    | 12       | 52162800 | T           | G         | 0.114                | F     | Y     | 0.114 |       |
| SCN2A | 2   | 166892938 | C        | A     | T           | 0.107     | D                    | Y     | 0.073 | SCN2A    | 12       | 52162800 | T           | G         | 0.114                | F     | Y     | 0.114 |       |
| SCN2A | 2   | 166892937 | T        | C     | 0.107       | D         | Y                    | 0.073 | SCN2A | 12       | 52162800 | T        | G           | 0.114     | F                    | Y     | 0.114 |       |       |
| SCN2A | 2   | 166892937 | T        | C     | 0.107       | D         | Y                    | 0.073 | SCN2A | 12       | 52162801 | C        | A           | 0.108     | F                    | L     | 0.029 |       |       |
| SCN2A | 2   | 166892936 | A        | T     | 0.107       | D         | Y                    | 0.073 | SCN2A | 12       | 52162801 | C        | A           | 0.108     | F                    | L     | 0.029 |       |       |
| SCN2A | 2   | 166892936 | A        | T     | 0.107       | D         | Y                    | 0.073 | SCN2A | 12       | 52162802 | A        | C           | 0.109     | M                    | L     | 0.017 |       |       |
| SCN2A | 2   | 166892935 | C        | A     | 0.108       | R         | W                    | 0.984 | SCN2A | 12       | 52162802 | A        | C           | 0.109     | M                    | L     | 0.017 |       |       |
| SCN2A | 2   | 166892935 | C        | A     | 0.108       | R         | W                    | 0.984 | SCN2A | 12       | 52162802 | A        | C           | 0.109     | M                    | L     | 0.017 |       |       |
| SCN2A | 2   | 166892934 | C        | A     | 0.108       | R         | M                    | 0.988 | SCN2A | 12       | 52162803 | T        | A           | 0.109     | M                    | K     | 0.038 |       |       |
| SCN2A | 2   | 166892934 | C        | A     | 0.108       | R         | M                    | 0.988 | SCN2A | 12       | 52162803 | T        | A           | 0.109     | M                    | K     | 0.038 |       |       |
| SCN2A | 2   | 166892933 | C        | A     | 0.108       | R         | K                    | 0.973 | SCN2A | 12       | 52162803 | T        | A           | 0.109     | M                    | R     | 0.039 |       |       |
| SCN2A | 2   | 166892933 | C        | A     | 0.108       | R         | K                    | 0.973 | SCN2A | 12       | 52162804 | G        | C           | 0.109     | M                    | I     | 0.009 |       |       |
| SCN2A | 2   | 166892933 | C        | A     | 0.108       | R         | S                    | 0.986 | SCN2A | 12       | 52162804 | G        | C           | 0.109     | M                    | I     | 0.009 |       |       |
| SCN2A | 2   | 166892932 | T        | A     | 0.109       | M         | L                    | 0.044 | SCN2A | 12       | 52162804 | G        | C           | 0.109     | M                    | I     | 0.009 |       |       |
| SCN2A | 2   | 166892932 | T        | A     | 0.109       | M         | L                    | 0.044 | SCN2A | 12       | 52162805 | C        | G           | 0.120     | Q                    | K     | 0.049 |       |       |
| SCN2A | 2   | 166892931 | A        | G     | 0.109       | M         | T                    | 0.105 | SCN2A | 12       | 52162805 | C        | G           | 0.120     | Q                    | K     | 0.049 |       |       |
| SCN2A | 2   | 1668      |          |       |             |           |                      |       |       |          |          |          |             |           |                      |       |       |       |       |

| GENE  | CHR | DNA LOC   | REF. | ALT | N    | NT | Amino | AA R          | AA A          | SCN Index | SCN Index Prediction | GENE      | CHR | DNA LOC | REF. | ALT   | N             | NT    | Amino         | AA R      | AA A | SCN Index | SCN Index Prediction |   |       |               |   |       |               |
|-------|-----|-----------|------|-----|------|----|-------|---------------|---------------|-----------|----------------------|-----------|-----|---------|------|-------|---------------|-------|---------------|-----------|------|-----------|----------------------|---|-------|---------------|---|-------|---------------|
| SCN2A | 2   | 166892862 | T    | G   | 1042 | Q  | P     | 0.027         | Likely Benign | SCN2A     | 2                    | 166892862 | T   | G       | 1042 | Q     | P             | 0.027 | Likely Benign | SCN2A     | 2    | 166892862 | T                    | G | 1042  | Q             | P | 0.027 | Likely Benign |
| SCN2A | 2   | 166892862 | T    | G   | 1042 | Q  | H     | 0.132         | Likely Benign | SCN2A     | 2                    | 166892862 | T   | G       | 1042 | Q     | H             | 0.132 | Likely Benign | SCN2A     | 2    | 166892862 | T                    | G | 1042  | Q             | H | 0.132 | Likely Benign |
| SCN2A | 2   | 166892860 | T    | C   | 1043 | K  | E     | 0.098         | Likely Benign | SCN2A     | 2                    | 166892860 | T   | C       | 1043 | K     | E             | 0.098 | Likely Benign | SCN2A     | 2    | 166892860 | T                    | C | 1043  | K             | E | 0.098 | Likely Benign |
| SCN2A | 2   | 166892860 | T    | C   | 1043 | K  | M     | 0.074         | Likely Benign | SCN2A     | 2                    | 166892860 | T   | C       | 1043 | K     | M             | 0.074 | Likely Benign | SCN2A     | 2    | 166892860 | T                    | C | 1043  | K             | M | 0.074 | Likely Benign |
| SCN2A | 2   | 166892859 | T    | A   | 1043 | K  | R     | 0.064         | Likely Benign | SCN2A     | 2                    | 166892859 | T   | A       | 1043 | K     | R             | 0.064 | Likely Benign | SCN2A     | 2    | 166892859 | T                    | A | 1043  | K             | R | 0.064 | Likely Benign |
| SCN2A | 2   | 166892858 | T    | A   | 1043 | K  | R     | 0.085         | Likely Benign | SCN2A     | 2                    | 166892858 | T   | A       | 1043 | K     | R             | 0.085 | Likely Benign | SCN2A     | 2    | 166892858 | T                    | A | 1043  | K             | R | 0.085 | Likely Benign |
| SCN2A | 2   | 166892857 | T    | A   | 1044 | I  | F     | 0.085         | Likely Benign | SCN2A     | 2                    | 166892857 | T   | A       | 1044 | I     | F             | 0.085 | Likely Benign | SCN2A     | 2    | 166892857 | T                    | A | 1044  | I             | F | 0.085 | Likely Benign |
| SCN2A | 2   | 166892857 | T    | C   | 1044 | V  | 0.034 | Likely Benign | SCN2A         | 2         | 166892857            | T         | C   | 1044    | V    | 0.034 | Likely Benign | SCN2A | 2             | 166892857 | T    | C         | 1044                 | V | 0.034 | Likely Benign |   |       |               |
| SCN2A | 2   | 166892857 | T    | C   | 1044 | V  | 0.035 | Likely Benign | SCN2A         | 2         | 166892857            | T         | C   | 1044    | V    | 0.035 | Likely Benign | SCN2A | 2             | 166892857 | T    | C         | 1044                 | V | 0.035 | Likely Benign |   |       |               |
| SCN2A | 2   | 166892856 | A    | C   | 1044 | S  | 0.020 | Likely Benign | SCN2A         | 2         | 166892856            | A         | C   | 1044    | S    | 0.020 | Likely Benign | SCN2A | 2             | 166892856 | A    | C         | 1044                 | S | 0.020 | Likely Benign |   |       |               |
| SCN2A | 2   | 166892856 | A    | T   | 1044 | N  | 0.037 | Likely Benign | SCN2A         | 2         | 166892856            | A         | T   | 1044    | N    | 0.037 | Likely Benign | SCN2A | 2             | 166892856 | A    | T         | 1044                 | N | 0.037 | Likely Benign |   |       |               |
| SCN2A | 2   | 166892855 | A    | C   | 1044 | M  | 0.043 | Likely Benign | SCN2A         | 2         | 166892855            | A         | C   | 1044    | M    | 0.043 | Likely Benign | SCN2A | 2             | 166892855 | A    | C         | 1044                 | M | 0.043 | Likely Benign |   |       |               |
| SCN2A | 2   | 166892854 | A    | C   | 1045 | V  | 0.054 | Likely Benign | SCN2A         | 2         | 166892854            | A         | C   | 1045    | V    | 0.054 | Likely Benign | SCN2A | 2             | 166892854 | A    | C         | 1045                 | V | 0.054 | Likely Benign |   |       |               |
| SCN2A | 2   | 166892854 | A    | T   | 1045 | L  | 0.044 | Likely Benign | SCN2A         | 2         | 166892854            | A         | T   | 1045    | L    | 0.044 | Likely Benign | SCN2A | 2             | 166892854 | A    | T         | 1045                 | L | 0.044 | Likely Benign |   |       |               |
| SCN2A | 2   | 166892853 | A    | C   | 1045 | L  | 0.052 | Likely Benign | SCN2A         | 2         | 166892853            | A         | C   | 1045    | L    | 0.052 | Likely Benign | SCN2A | 2             | 166892853 | A    | C         | 1045                 | L | 0.052 | Likely Benign |   |       |               |
| SCN2A | 2   | 166892852 | T    | G   | 1045 | L  | F     | 0.107         | Likely Benign | SCN2A     | 2                    | 166892852 | T   | G       | 1045 | L     | F             | 0.107 | Likely Benign | SCN2A     | 2    | 166892852 | T                    | G | 1045  | L             | F | 0.107 | Likely Benign |
| SCN2A | 2   | 166892852 | T    | G   | 1045 | F  | 0.102 | Likely Benign | SCN2A         | 2         | 166892852            | T         | G   | 1045    | F    | 0.102 | Likely Benign | SCN2A | 2             | 166892852 | T    | G         | 1045                 | F | 0.102 | Likely Benign |   |       |               |
| SCN2A | 2   | 166892851 | T    | G   | 1046 | V  | 0.115 | Likely Benign | SCN2A         | 2         | 166892851            | T         | G   | 1046    | V    | 0.115 | Likely Benign | SCN2A | 2             | 166892851 | T    | G         | 1046                 | V | 0.115 | Likely Benign |   |       |               |
| SCN2A | 2   | 166892851 | T    | G   | 1046 | D  | H     | 0.115         | Likely Benign | SCN2A     | 2                    | 166892851 | T   | G       | 1046 | D     | H             | 0.115 | Likely Benign | SCN2A     | 2    | 166892851 | T                    | G | 1046  | D             | H | 0.115 | Likely Benign |
| SCN2A | 2   | 166892850 | T    | A   | 1046 | D  | V     | 0.057         | Likely Benign | SCN2A     | 2                    | 166892850 | T   | A       | 1046 | D     | V             | 0.057 | Likely Benign | SCN2A     | 2    | 166892850 | T                    | A | 1046  | D             | V | 0.057 | Likely Benign |
| SCN2A | 2   | 166892850 | T    | A   | 1046 | D  | V     | 0.102         | Likely Benign | SCN2A     | 2                    | 166892850 | T   | A       | 1046 | D     | V             | 0.102 | Likely Benign | SCN2A     | 2    | 166892850 | T                    | A | 1046  | D             | V | 0.102 | Likely Benign |
| SCN2A | 2   | 166892849 | T    | G   | 1046 | D  | G     | 0.063         | Likely Benign | SCN2A     | 2                    | 166892849 | T   | G       | 1046 | D     | G             | 0.063 | Likely Benign | SCN2A     | 2    | 166892849 | T                    | G | 1046  | D             | G | 0.063 | Likely Benign |
| SCN2A | 2   | 166892849 | T    | G   | 1046 | A  | 0.053 | Likely Benign | SCN2A         | 2         | 166892849            | T         | G   | 1046    | A    | 0.053 | Likely Benign | SCN2A | 2             | 166892849 | T    | G         | 1046                 | A | 0.053 | Likely Benign |   |       |               |
| SCN2A | 2   | 166892848 | C    | G   | 1047 | E  | 0.034 | Likely Benign | SCN2A         | 2         | 166892848            | C         | G   | 1047    | E    | 0.034 | Likely Benign | SCN2A | 2             | 166892848 | C    | G         | 1047                 | E | 0.034 | Likely Benign |   |       |               |
| SCN2A | 2   | 166892848 | C    | G   | 1047 | K  | 0.102 | Likely Benign | SCN2A         | 2         | 166892848            | C         | G   | 1047    | K    | 0.102 | Likely Benign | SCN2A | 2             | 166892848 | C    | G         | 1047                 | K | 0.102 | Likely Benign |   |       |               |
| SCN2A | 2   | 166892847 | T    | A   | 1047 | E  | 0.093 | Likely Benign | SCN2A         | 2         | 166892847            | T         | A   | 1047    | E    | 0.093 | Likely Benign | SCN2A | 2             | 166892847 | T    | A         | 1047                 | E | 0.093 | Likely Benign |   |       |               |
| SCN2A | 2   | 166892847 | T    | A   | 1047 | G  | 0.071 | Likely Benign | SCN2A         | 2         | 166892847            | T         | A   | 1047    | G    | 0.071 | Likely Benign | SCN2A | 2             | 166892847 | T    | A         | 1047                 | G | 0.071 | Likely Benign |   |       |               |
| SCN2A | 2   | 166892846 | T    | A   | 1047 | D  | 0.130 | Likely Benign | SCN2A         | 2         | 166892846            | T         | A   | 1047    | D    | 0.130 | Likely Benign | SCN2A | 2             | 166892846 | T    | A         | 1047                 | D | 0.130 | Likely Benign |   |       |               |
| SCN2A | 2   | 166892846 | T    | G   | 1047 | D  | 0.119 | Likely Benign | SCN2A         | 2         | 166892846            | T         | G   | 1047    | D    | 0.119 | Likely Benign | SCN2A | 2             | 166892846 | T    | G         | 1047                 | D | 0.119 | Likely Benign |   |       |               |
| SCN2A | 2   | 166892845 | T    | G   | 1048 | L  | 0.133 | Likely Benign | SCN2A         | 2         | 166892845            | T         | G   | 1048    | L    | 0.133 | Likely Benign | SCN2A | 2             | 166892845 | T    | G         | 1048                 | L | 0.133 | Likely Benign |   |       |               |
| SCN2A | 2   | 166892844 | A    | C   | 1048 | S  | 0.046 | Likely Benign | SCN2A         | 2         | 166892844            | A         | C   | 1048    | S    | 0.046 | Likely Benign | SCN2A | 2             | 166892844 | A    | C         | 1048                 | S | 0.046 | Likely Benign |   |       |               |
| SCN2A | 2   | 166892844 | A    | C   | 1048 | S  | 0.069 | Likely Benign | SCN2A         | 2         | 166892844            | A         | C   | 1048    | S    | 0.069 | Likely Benign | SCN2A | 2             | 166892844 | A    | C         | 1048                 | S | 0.069 | Likely Benign |   |       |               |
| SCN2A | 2   | 166892844 | A    | C   | 1048 | S  | 0.046 | Likely Benign | SCN2A         | 2         | 166892844            | A         | C   | 1048    | S    | 0.046 | Likely Benign | SCN2A | 2             | 166892844 | A    | C         | 1048                 | S | 0.046 | Likely Benign |   |       |               |
| SCN2A | 2   | 166892843 | A    | C   | 1048 | M  | 0.058 | Likely Benign | SCN2A         | 2         | 166892843            | A         | C   | 1048    | M    | 0.058 | Likely Benign | SCN2A | 2             | 166892843 | A    | C         | 1048                 | M | 0.058 | Likely Benign |   |       |               |
| SCN2A | 2   | 166892843 | T    | G   | 1049 | K  | 0.119 | Likely Benign | SCN2A         | 2         | 166892843            | T         | G   | 1049    | K    | 0.119 | Likely Benign | SCN2A | 2             | 166892843 | T    | G         | 1049                 | K | 0.119 | Likely Benign |   |       |               |
| SCN2A | 2   | 166892841 | T    | G   | 1049 | K  | 0.185 | Likely Benign | SCN2A         | 2         | 166892841            | T         | G   | 1049    | K    | 0.185 | Likely Benign | SCN2A | 2             | 166892841 | T    | G         | 1049                 | K | 0.185 | Likely Benign |   |       |               |
| SCN2A | 2   | 166892840 | T    | G   | 1049 | K  | 0.227 | Likely Benign | SCN2A         | 2         | 166892840            | T         | G   | 1049    | K    | 0.227 | Likely Benign | SCN2A | 2             | 166892840 | T    | G         | 1049                 | K | 0.227 | Likely Benign |   |       |               |
| SCN2A | 2   | 166892840 | T    | G   | 1049 | K  | N     | 0.228         | Likely Benign | SCN2A     | 2                    | 166892840 | T   | G       | 1049 | K     | N             | 0.228 | Likely Benign | SCN2A     | 2    | 166892840 | T                    | G | 1049  | K             | N | 0.228 | Likely Benign |
| SCN2A | 2   | 166892839 | G    | C   | 1050 | P  | 0.053 | Likely Benign | SCN2A         | 2         | 166892839            | G         | C   | 1050    | P    | 0.053 | Likely Benign | SCN2A | 2             | 166892839 | G    | C         | 1050                 | P | 0.053 | Likely Benign |   |       |               |
| SCN2A | 2   | 166892839 | G    | C   | 1050 | P  | 0.057 | Likely Benign | SCN2A         | 2         | 166892839            | G         | C   | 1050    | P    | 0.057 | Likely Benign | SCN2A | 2             | 166892839 | G    | C         | 1050                 | P | 0.057 | Likely Benign |   |       |               |
| SCN2A | 2   | 166892838 | G    | C   | 1050 | P  | 0.091 | Likely Benign | SCN2A         | 2         | 166892838            | G         | C   | 1050    | P    | 0.091 | Likely Benign | SCN2A | 2             | 166892838 | G    | C         | 1050                 | P | 0.091 | Likely Benign |   |       |               |
| SCN2A | 2   | 166892838 | G    | C   | 1050 | P  | 0.070 | Likely Benign | SCN2A         | 2         | 166892838            | G         | C   | 1050    | P    | 0.070 | Likely Benign | SCN2A | 2             | 166892838 | G    | C         | 1050                 | P | 0.070 | Likely Benign |   |       |               |
| SCN2A | 2   | 166892838 | G    | C   | 1050 | P  | 0.076 | Likely Benign | SCN2A         | 2         | 166892838            | G         | C   | 1050    | P    | 0.076 | Likely Benign | SCN2A | 2             | 166892838 | G    | C         | 1050                 | P | 0.076 | Likely Benign |   |       |               |
| SCN2A | 2   | 166892836 | A    | C   | 1051 | L  | V     | 0.060         | Likely Benign | SCN2A     | 2                    | 166892836 | A   | C       | 1051 | L     | V             | 0.060 | Likely Benign | SCN2A     | 2    | 166892836 | A                    | C | 1051  | L             | V | 0.060 | Likely Benign |
| SCN2A | 2   | 166892836 | G    | C   | 1051 | L  | V     | 0.176         | Likely Benign | SCN2A     | 2                    | 166892836 | G   | C       | 1051 | L     | V             | 0.176 | Likely Benign | SCN2A     | 2    | 166892836 | G                    | C | 1051  | L             | V | 0.176 | Likely Benign |
| SCN2A | 2   | 166892835 | A    | C   | 1051 | L  | R     | 0.277         | Likely Benign | SCN2A     | 2                    | 166892835 | A   | C       | 1051 | L     | R             | 0.277 | Likely Benign | SCN2A     | 2    | 166892835 | A                    | C | 1051  | L             | R | 0.277 | Likely Benign |
| SCN2A | 2   | 166892835 | A    | C   | 1051 | L  | R     | 0.115         | Likely Benign | SCN2A     | 2                    | 166892835 | A   | C       | 1051 | L     | R             | 0.115 | Likely Benign | SCN2A     | 2    | 166892835 | A                    | C | 1051  | L             | R | 0.115 | Likely Benign |
| SCN2A | 2   | 166892833 | C    | A   | 1052 | D  | Y     | 0.133         | Likely Benign | SCN2A     | 2                    | 166892833 | C   | A       | 1052 | D     | Y             | 0.133 | Likely Benign | SCN2A     | 2    | 166892833 | C                    | A | 1052  | D             | Y | 0.133 | Likely Benign |
| SCN2A | 2   | 166892833 | C    | A   | 1052 | D  | Y     | 0.188         | Likely Benign | SCN2A     | 2                    | 166892833 | C   | A       | 1052 | D     | Y             | 0.188 | Likely Benign | SCN2A     | 2    | 166892833 | C                    | A | 1052  | D             | Y | 0.188 | Likely Benign |
| SCN2A | 2   | 166892833 | C    | T   | 1052 | N  | N     | 0.060         | Likely Benign | SCN2A     | 2                    | 166892833 | C   | T       | 1052 | N     | N             | 0.060 | Likely Benign | SCN2A     | 2    | 166892833 | C                    | T | 1052  | N             | N | 0.060 | Likely Benign |
| SCN2A | 2   | 166892832 | C    | T   | 1052 | D  | G     | 0.113         | Likely Benign | SCN2A     | 2                    | 166892832 | C   | T       | 1052 | D     | G             | 0.113 | Likely Benign | SCN2A     | 2    | 166892832 | C                    | T | 1052  | D             | G | 0.113 | Likely Benign |
| SCN2A | 2   | 166892832 | T    | G   | 1052 | D  | A     | 0.078         | Likely Benign | SCN2A     | 2                    | 166892832 | T   | G       | 1052 | D     | A             | 0.078 | Likely Benign | SCN2A     | 2    | 166892832 | T                    | G | 1052  | D             | A | 0.078 | Likely Benign |
| SCN2A | 2   | 166892832 | T    | G   | 1052 | D  | A     | 0.058         | Likely Benign | SCN2A     | 2                    | 166892832 | T   | G       | 1052 | D     | A             | 0.058 | Likely Benign | SCN2A     | 2    | 166892832 | T                    | G | 1052  | D             | A | 0.058 | Likely Benign |
| SCN2A | 2   | 166892831 | A    | T   | 1052 | D  | O     | 0.221         | Likely Benign | SCN2A     | 2                    | 166892831 | A   | T       | 1052 | D     | O             | 0.221 | Likely Benign | SCN2A     | 2    | 166892831 | A                    | T | 1052  |               |   |       |               |



| GENE  |     |          |     |     |       |    |   |       |               |           |                      |          |     | GENE |      |     |     |       |                 |       |    |          |    |    |           |                      |    |       |                   |
|-------|-----|----------|-----|-----|-------|----|---|-------|---------------|-----------|----------------------|----------|-----|------|------|-----|-----|-------|-----------------|-------|----|----------|----|----|-----------|----------------------|----|-------|-------------------|
| CHW   | DNA | LOC      | REF | ALT | Amino | AA | R | AA    | AL            | SCN Index | SCN Index Prediction | NT       | Add | EF   | CHW  | DNA | LOC | REF   | ALT             | Amino | AA | R        | AA | AL | SCN Index | SCN Index Prediction | NT | Add   | EF                |
| SCN2A | 2   | 16682698 | T   | C   | 1097  | I  | I | 0.040 | Likely Benign | SCN2A     | 2                    | 16621061 | G   | C    | 1093 | M   | I   | 0.133 | Possibly Benign | SCN2A | 12 | 16253037 | C  | A  | 1097      | P                    | R  | 0.939 | Likely Pathogenic |
| SCN2A | 2   | 16682698 | T   | G   | 1097  | I  | I | 0.051 | Likely Benign | SCN2A     | 2                    | 16621061 | G   | T    | 1093 | M   | I   | 0.133 | Likely Benign   | SCN2A | 12 | 16253037 | C  | G  | 1097      | P                    | R  | 0.942 | Likely Pathogenic |
| SCN2A | 2   | 16682697 | A   | A   | 1087  | I  | S | 0.082 | Likely Benign | SCN2A     | 2                    | 16621062 | T   | A    | 1093 | F   | L   | 0.082 | Likely Benign   | SCN2A | 12 | 16253038 | T  | A  | 1097      | F                    | I  | 0.957 | Likely Pathogenic |
| SCN2A | 2   | 16682697 | A   | G   | 1097  | T  | T | 0.062 | Likely Benign | SCN2A     | 2                    | 16621062 | T   | C    | 1094 | S   | P   | 0.316 | Likely Benign   | SCN2A | 12 | 16253039 | A  | C  | 1098      | I                    | L  | 0.934 | Likely Pathogenic |
| SCN2A | 2   | 16682696 | A   | C   | 1097  | I  | M | 0.158 | Likely Benign | SCN2A     | 2                    | 16621063 | C   | G    | 1094 | S   | L   | 0.315 | Likely Benign   | SCN2A | 12 | 16253039 | A  | G  | 1098      | I                    | F  | 0.921 | Likely Pathogenic |
| SCN2A | 2   | 16682695 | C   | A   | 1098  | D  | Y | 0.276 | Likely Benign | SCN2A     | 2                    | 16621065 | T   | A    | 1095 | F   | I   | 0.121 | Likely Benign   | SCN2A | 12 | 16253040 | T  | A  | 1098      | I                    | N  | 0.954 | Likely Pathogenic |
| SCN2A | 2   | 16682695 | C   | T   | 1098  | D  | Y | 0.276 | Likely Benign | SCN2A     | 2                    | 16621065 | T   | G    | 1095 | F   | V   | 0.091 | Likely Benign   | SCN2A | 12 | 16253040 | T  | G  | 1098      | I                    | S  | 0.947 | Likely Pathogenic |
| SCN2A | 2   | 16682695 | C   | T   | 1098  | D  | Y | 0.276 | Likely Benign | SCN2A     | 2                    | 16621065 | T   | G    | 1095 | F   | V   | 0.091 | Likely Benign   | SCN2A | 12 | 16253040 | T  | G  | 1098      | I                    | S  | 0.947 | Likely Pathogenic |
| SCN2A | 2   | 16682694 | T   | G   | 1098  | D  | A | 0.119 | Likely Benign | SCN2A     | 2                    | 16621066 | T   | G    | 1095 | F   | C   | 0.31  | Likely Benign   | SCN2A | 12 | 16253042 | C  | G  | 1099      | A                    | P  | 0.628 | Likely Benign     |
| SCN2A | 2   | 16682694 | T   | G   | 1098  | D  | A | 0.119 | Likely Benign | SCN2A     | 2                    | 16621067 | T   | A    | 1097 | N   | T   | 0.043 | Likely Benign   | SCN2A | 12 | 16253042 | C  | T  | 1097      | F                    | C  | 0.915 | Likely Pathogenic |
| SCN2A | 2   | 16682693 | A   | T   | 1098  | D  | E | 0.043 | Likely Benign | SCN2A     | 2                    | 16621067 | T   | G    | 1095 | F   | L   | 0.062 | Likely Benign   | SCN2A | 12 | 16253043 | C  | A  | 1099      | A                    | D  | 0.860 | Likely Pathogenic |
| SCN2A | 2   | 16682692 | C   | T   | 1099  | E  | G | 0.285 | Likely Benign | SCN2A     | 2                    | 16621068 | A   | G    | 1096 | I   | V   | 0.057 | Likely Benign   | SCN2A | 12 | 16253043 | C  | T  | 1099      | A                    | V  | 0.700 | Likely Benign     |
| SCN2A | 2   | 16682691 | T   | A   | 1099  | E  | V | 0.289 | Likely Benign | SCN2A     | 2                    | 16621068 | A   | T    | 1096 | I   | L   | 0.07  | Likely Benign   | SCN2A | 12 | 16253045 | A  | G  | 1100      | V                    | M  | 0.130 | Likely Benign     |
| SCN2A | 2   | 16682691 | T   | G   | 1099  | E  | A | 0.147 | Likely Benign | SCN2A     | 2                    | 16621069 | T   | C    | 1096 | I   | T   | 0.152 | Likely Benign   | SCN2A | 12 | 16253045 | G  | T  | 1100      | V                    | L  | 0.296 | Likely Benign     |
| SCN2A | 2   | 16682690 | T   | G   | 1099  | E  | D | 0.058 | Likely Benign | SCN2A     | 2                    | 16621070 | A   | G    | 1096 | I   | M   | 0.119 | Likely Benign   | SCN2A | 12 | 16253046 | T  | G  | 1100      | V                    | E  | 0.170 | Likely Benign     |
| SCN2A | 2   | 16682689 | T   | G   | 1100  | S  | C | 0.117 | Likely Benign | SCN2A     | 2                    | 16621071 | A   | C    | 1097 | N   | H   | 0.022 | Likely Benign   | SCN2A | 12 | 16253046 | T  | G  | 1100      | V                    | G  | 0.599 | Likely Benign     |
| SCN2A | 2   | 16682689 | T   | G   | 1100  | S  | R | 0.058 | Likely Benign | SCN2A     | 2                    | 16621071 | A   | T    | 1097 | N   | Y   | 0.282 | Likely Benign   | SCN2A | 12 | 16253048 | G  | C  | 1101      | G                    | R  | 0.741 | Likely Benign     |
| SCN2A | 2   | 16682688 | C   | G   | 1100  | S  | I | 0.070 | Likely Benign | SCN2A     | 2                    | 16621072 | A   | G    | 1097 | N   | S   | 0.051 | Likely Benign   | SCN2A | 12 | 16253049 | G  | A  | 1101      | G                    | D  | 0.638 | Likely Benign     |
| SCN2A | 2   | 16682688 | C   | T   | 1100  | S  | N | 0.038 | Likely Benign | SCN2A     | 2                    | 16621072 | A   | T    | 1097 | N   | I   | 0.123 | Likely Benign   | SCN2A | 12 | 16253049 | G  | A  | 1101      | E                    | A  | 0.083 | Likely Benign     |
| SCN2A | 2   | 16682687 | A   | C   | 1100  | S  | Y | 0.058 | Likely Benign | SCN2A     | 2                    | 16621073 | C   | G    | 1097 | N   | K   | 0.144 | Likely Benign   | SCN2A | 12 | 16253049 | G  | T  | 1101      | G                    | V  | 0.520 | Likely Benign     |
| SCN2A | 2   | 16682686 | C   | G   | 1101  | D  | H | 0.399 | Likely Benign | SCN2A     | 2                    | 16621074 | A   | T    | 1098 | N   | D   | 0.098 | Likely Benign   | SCN2A | 12 | 16253052 | A  | G  | 1102      | E                    | A  | 0.852 | Likely Benign     |
| SCN2A | 2   | 16682686 | C   | T   | 1101  | D  | N | 0.184 | Likely Benign | SCN2A     | 2                    | 16621074 | A   | T    | 1098 | N   | Y   | 0.769 | Likely Benign   | SCN2A | 12 | 16253052 | A  | G  | 1102      | E                    | G  | 0.705 | Likely Benign     |
| SCN2A | 2   | 16682685 | A   | C   | 1101  | D  | G | 0.181 | Likely Benign | SCN2A     | 2                    | 16621075 | A   | T    | 1098 | N   | Y   | 0.769 | Likely Benign   | SCN2A | 12 | 16253053 | A  | G  | 1102      | E                    | G  | 0.705 | Likely Benign     |
| SCN2A | 2   | 16682684 | A   | C   | 1101  | D  | A | 0.494 | Likely Benign | SCN2A     | 2                    | 16621075 | A   | T    | 1098 | N   | S   | 0.112 | Likely Benign   | SCN2A | 12 | 16253053 | G  | C  | 1102      | E                    | D  | 0.342 | Likely Benign     |
| SCN2A | 2   | 16682684 | A   | C   | 1101  | D  | A | 0.494 | Likely Benign | SCN2A     | 2                    | 16621076 | C   | A    | 1098 | N   | K   | 0.24  | Likely Benign   | SCN2A | 12 | 16253054 | T  | C  | 1103      | S                    | T  | 0.342 | Likely Benign     |
| SCN2A | 2   | 16682684 | A   | C   | 1101  | D  | E | 0.051 | Likely Benign | SCN2A     | 2                    | 16621076 | C   | A    | 1098 | N   | K   | 0.24  | Likely Benign   | SCN2A | 12 | 16253054 | T  | C  | 1103      | S                    | T  | 0.342 | Likely Benign     |
| SCN2A | 2   | 16682683 | A   | G   | 1102  | Y  | H | 0.052 | Likely Benign | SCN2A     | 2                    | 16621077 | C   | G    | 1099 | P   | A   | 0.13  | Likely Benign   | SCN2A | 12 | 16253055 | T  | C  | 1103      | S                    | P  | 0.916 | Likely Pathogenic |
| SCN2A | 2   | 16682682 | T   | A   | 1102  | Y  | H | 0.052 | Likely Benign | SCN2A     | 2                    | 16621077 | C   | G    | 1099 | P   | A   | 0.13  | Likely Benign   | SCN2A | 12 | 16253055 | T  | C  | 1103      | S                    | P  | 0.916 | Likely Pathogenic |
| SCN2A | 2   | 16682682 | T   | C   | 1102  | Y  | C | 0.056 | Likely Benign | SCN2A     | 2                    | 16621078 | C   | G    | 1099 | P   | H   | 0.694 | Likely Benign   | SCN2A | 12 | 16253055 | G  | A  | 1103      | S                    | F  | 0.858 | Likely Pathogenic |
| SCN2A | 2   | 16682682 | T   | C   | 1102  | Y  | C | 0.056 | Likely Benign | SCN2A     | 2                    | 16621078 | C   | G    | 1099 | P   | R   | 0.648 | Likely Benign   | SCN2A | 12 | 16253057 | G  | A  | 1104      | D                    | N  | 0.940 | Likely Pathogenic |
| SCN2A | 2   | 16682680 | T   | A   | 1103  | M  | L | 0.057 | Likely Benign | SCN2A     | 2                    | 16621080 | A   | G    | 1100 | S   | R   | 0.169 | Likely Benign   | SCN2A | 12 | 16253057 | G  | T  | 1104      | D                    | Y  | 0.834 | Likely Pathogenic |
| SCN2A | 2   | 16682680 | T   | G   | 1103  | M  | V | 0.162 | Likely Benign | SCN2A     | 2                    | 16621080 | A   | G    | 1100 | S   | C   | 0.337 | Likely Benign   | SCN2A | 12 | 16253058 | A  | G  | 1104      | D                    | G  | 0.936 | Likely Pathogenic |
| SCN2A | 2   | 16682679 | A   | C   | 1103  | M  | R | 0.123 | Likely Benign | SCN2A     | 2                    | 16621081 | G   | A    | 1100 | S   | N   | 0.05  | Likely Benign   | SCN2A | 12 | 16253058 | A  | G  | 1104      | D                    | V  | 0.950 | Likely Pathogenic |
| SCN2A | 2   | 16682679 | A   | T   | 1103  | M  | K | 0.165 | Likely Benign | SCN2A     | 2                    | 16621081 | G   | T    | 1100 | S   | I   | 0.26  | Likely Benign   | SCN2A | 12 | 16253059 | C  | G  | 1104      | D                    | E  | 0.652 | Likely Benign     |
| SCN2A | 2   | 16682678 | C   | G   | 1103  | M  | I | 0.120 | Likely Benign | SCN2A     | 2                    | 16621082 | C   | G    | 1100 | S   | R   | 0.16  | Likely Benign   | SCN2A | 12 | 16253060 | T  | G  | 1105      | F                    | L  | 0.097 | Likely Benign     |
| SCN2A | 2   | 16682678 | C   | T   | 1103  | M  | I | 0.121 | Likely Benign | SCN2A     | 2                    | 16621082 | C   | G    | 1101 | L   | I   | 0.191 | Likely Benign   | SCN2A | 12 | 16253060 | T  | G  | 1105      | F                    | V  | 0.097 | Likely Benign     |
| SCN2A | 2   | 16682677 | S   | G   | 1104  | S  | P | 0.562 | Likely Benign | SCN2A     | 2                    | 16621083 | T   | C    | 1101 | L   | F   | 0.203 | Likely Benign   | SCN2A | 12 | 16253061 | T  | C  | 1105      | F                    | S  | 0.306 | Likely Benign     |
| SCN2A | 2   | 16682676 | G   | A   | 1104  | S  | T | 0.103 | Likely Benign | SCN2A     | 2                    | 16621084 | T   | C    | 1101 | L   | P   | 0.236 | Likely Benign   | SCN2A | 12 | 16253062 | T  | C  | 1105      | F                    | L  | 0.745 | Likely Benign     |
| SCN2A | 2   | 16682674 | A   | C   | 1105  | F  | V | 0.228 | Likely Benign | SCN2A     | 2                    | 16621084 | T   | C    | 1101 | L   | R   | 0.518 | Likely Benign   | SCN2A | 12 | 16253062 | T  | C  | 1105      | F                    | L  | 0.745 | Likely Benign     |
| SCN2A | 2   | 16682674 | A   | T   | 1105  | F  | I | 0.319 | Likely Benign | SCN2A     | 2                    | 16621086 | A   | G    | 1102 | T   | A   | 0.234 | Likely Benign   | SCN2A | 12 | 16253063 | G  | C  | 1106      | E                    | Q  | 0.881 | Likely Benign     |
| SCN2A | 2   | 16682673 | A   | G   | 1105  | F  | C | 0.450 | Likely Benign | SCN2A     | 2                    | 16621086 | A   | G    | 1102 | T   | A   | 0.234 | Likely Benign   | SCN2A | 12 | 16253064 | A  | T  | 1106      | E                    | G  | 0.899 | Likely Pathogenic |
| SCN2A | 2   | 16682673 | A   | T   | 1105  | F  | Y | 0.079 | Likely Benign | SCN2A     | 2                    | 16621087 | C   | G    | 1102 | T   | S   | 0.096 | Likely Benign   | SCN2A | 12 | 16253064 | A  | T  | 1106      | E                    | V  | 0.937 | Likely Pathogenic |
| SCN2A | 2   | 16682672 | C   | T   | 1105  | F  | Y | 0.079 | Likely Benign | SCN2A     | 2                    | 16621087 | C   | G    | 1102 | T   | S   | 0.096 | Likely Benign   | SCN2A | 12 | 16253064 | A  | T  | 1106      | E                    | V  | 0.937 | Likely Pathogenic |
| SCN2A | 2   | 16682672 | C   | T   | 1105  | F  | Y | 0.079 | Likely Benign | SCN2A     | 2                    | 16621088 | G   | A    | 1103 | V   | M   | 0.267 | Likely Benign   | SCN2A | 12 | 16253065 | G  | T  | 1106      | E                    | D  | 0.157 | Likely Benign     |
| SCN2A | 2   | 16682671 | T   | G   | 1106  | I  | L | 0.078 | Likely Benign | SCN2A     | 2                    | 16621089 | G   | A    | 1103 | V   | M   | 0.267 | Likely Benign   | SCN2A | 12 | 16253066 | A  | G  | 1107      | N                    | D  | 0.354 | Likely Benign     |
| SCN2A | 2   | 16682671 | T   | G   | 1106  | I  | L | 0.078 | Likely Benign | SCN2A     | 2                    | 16621090 | T   | A    | 1103 | V   | E   | 0.145 | Likely Benign   | SCN2A | 12 | 16253066 | A  | G  | 1107      | N                    | D  | 0.354 | Likely Benign     |
| SCN2A | 2   | 16682670 | A   | G   | 1106  | I  | T | 0.197 | Likely Benign | SCN2A     | 2                    | 16621090 | T   | A    | 1103 | V   | E   | 0.145 | Likely Benign   | SCN2A | 12 | 16253067 | A  | G  | 1107      | N                    | S  | 0.395 | Likely Benign     |
| SCN2A | 2   | 16682669 | T   | G   | 1106  | I  | M | 0.701 | Likely Benign | SCN2A     | 2                    | 16621092 | A   | G    | 1104 | T   | A   | 0.08  | Likely Benign   | SCN2A | 12 | 16253068 | C  | G  | 1107      | N                    | K  | 0.523 | Likely Benign     |
| SCN2A | 2   | 16682668 | T   | A   | 1107  | N  | Y | 0.132 | Likely Benign | SCN2A     | 2                    | 16621092 | A   | G    | 1104 | T   | A   | 0.08  | Likely Benign   | SCN2A | 12 | 16253068 | C  | G  | 1107      | N                    | K  | 0.523 | Likely Benign     |
| SCN2A | 2   | 16682668 | T   | G   | 1107  | N  | O | 0.018 | Likely Benign | SCN2A     | 2                    | 16621093 | C   | G    | 1104 | T   | R   | 0.068 | Likely Benign   | SCN2A | 12 | 16253069 | C  | G  | 1108      | L                    | V  | 0.118 | Likely Benign     |
| SCN2A | 2   | 16682667 | T   | C   | 1107  | N  | S | 0.082 | Likely Benign | SCN2A     | 2                    | 16621095 | G   | A    | 1105 | V   | I   | 0.315 | Likely Benign   | SCN2A | 12 | 16253070 | T  | C  | 1108      | L                    | H  | 0.077 | Likely Benign     |
| SCN2A | 2   | 16682667 |     |     |       |    |   |       |               |           |                      |          |     |      |      |     |     |       |                 |       |    |          |    |    |           |                      |    |       |                   |

| GENE  |     |          |     |     |       |      |      |           |                      | GENE  |     |          |     |     |       |      |      |           |                      | GENE  |     |          |     |     |       |      |      |           |                      | GENE          |       |         |          |     |       |      |      |           |                      |       |               |
|-------|-----|----------|-----|-----|-------|------|------|-----------|----------------------|-------|-----|----------|-----|-----|-------|------|------|-----------|----------------------|-------|-----|----------|-----|-----|-------|------|------|-----------|----------------------|---------------|-------|---------|----------|-----|-------|------|------|-----------|----------------------|-------|---------------|
| GENE  | CHR | DNA_LOC  | REF | ALT | Amino | AA_R | AA_L | SCN Index | SCN Index Prediction | GENE  | CHR | DNA_LOC  | REF | ALT | Amino | AA_R | AA_L | SCN Index | SCN Index Prediction | GENE  | CHR | DNA_LOC  | REF | ALT | Amino | AA_R | AA_L | SCN Index | SCN Index Prediction | GENE          | CHR   | DNA_LOC | REF      | ALT | Amino | AA_R | AA_L | SCN Index | SCN Index Prediction |       |               |
| SCN1A | 2   | 16682616 | A   | T   | 1124  | F    | Y    | 0.345     | Likely Benign        | SCN2A | 2   | 16621145 | A   | T   | 1121  | E    | D    | 0.02      | Likely Benign        | SCN3A | 12  | 12621118 | A   | G   | T     | 1124 | D    | G         | 0.053                | Likely Benign | SCN4A | 12      | 12621118 | A   | G     | T    | 1124 | D         | G                    | 0.053 | Likely Benign |
| SCN1A | 2   | 16682616 | A   | C   | 1124  | F    | L    | 0.045     | Likely Benign        | SCN2A | 2   | 16621146 | T   | A   | 1121  | F    | I    | 0.088     | Likely Benign        | SCN3A | 12  | 12621118 | A   | G   | T     | 1124 | D    | V         | 0.042                | Likely Benign | SCN4A | 12      | 12621118 | A   | G     | T    | 1124 | D         | V                    | 0.042 | Likely Benign |
| SCN1A | 2   | 16682616 | A   | T   | 1124  | F    | L    | 0.045     | Likely Benign        | SCN2A | 2   | 16621146 | T   | A   | 1121  | F    | I    | 0.088     | Likely Benign        | SCN3A | 12  | 12621118 | A   | G   | T     | 1124 | D    | V         | 0.042                | Likely Benign | SCN4A | 12      | 12621118 | A   | G     | T    | 1124 | D         | V                    | 0.042 | Likely Benign |
| SCN1A | 2   | 16682616 | A   | G   | 1125  | E    | Q    | 0.816     | Likely Pathogenic    | SCN2A | 2   | 16621146 | T   | G   | 1122  | F    | V    | 0.201     | Likely Benign        | SCN3A | 12  | 12621118 | A   | G   | T     | 1124 | D    | K         | 0.135                | Likely Benign | SCN4A | 12      | 12621118 | A   | G     | T    | 1124 | D         | K                    | 0.135 | Likely Benign |
| SCN1A | 2   | 16682616 | A   | T   | 1125  | E    | Q    | 0.719     | Likely Benign        | SCN2A | 2   | 16621147 | T   | G   | 1122  | F    | S    | 0.078     | Likely Benign        | SCN3A | 12  | 12621118 | A   | G   | T     | 1124 | D    | K         | 0.135                | Likely Benign | SCN4A | 12      | 12621118 | A   | G     | T    | 1124 | D         | K                    | 0.135 | Likely Benign |
| SCN1A | 2   | 16682616 | T   | C   | 1125  | E    | Q    | 0.916     | Likely Pathogenic    | SCN2A | 2   | 16621147 | T   | G   | 1122  | F    | S    | 0.078     | Likely Benign        | SCN3A | 12  | 12621118 | A   | G   | T     | 1124 | D    | K         | 0.135                | Likely Benign | SCN4A | 12      | 12621118 | A   | G     | T    | 1124 | D         | K                    | 0.135 | Likely Benign |
| SCN1A | 2   | 16682616 | T   | C   | 1125  | E    | Q    | 0.872     | Likely Pathogenic    | SCN2A | 2   | 16621148 | T   | G   | 1122  | F    | L    | 0.359     | Likely Benign        | SCN3A | 12  | 12621118 | A   | G   | T     | 1124 | D    | K         | 0.135                | Likely Benign | SCN4A | 12      | 12621118 | A   | G     | T    | 1124 | D         | K                    | 0.135 | Likely Benign |
| SCN1A | 2   | 16682616 | T   | C   | 1125  | E    | D    | 0.142     | Likely Benign        | SCN2A | 2   | 16621148 | T   | G   | 1122  | F    | L    | 0.359     | Likely Benign        | SCN3A | 12  | 12621118 | A   | G   | T     | 1124 | D    | K         | 0.135                | Likely Benign | SCN4A | 12      | 12621118 | A   | G     | T    | 1124 | D         | K                    | 0.135 | Likely Benign |
| SCN1A | 2   | 16682616 | T   | C   | 1126  | N    | Y    | 0.142     | Likely Benign        | SCN2A | 2   | 16621149 | A   | T   | 1123  | S    | C    | 0.827     | Likely Pathogenic    | SCN3A | 12  | 12621118 | A   | G   | T     | 1124 | D    | K         | 0.135                | Likely Benign | SCN4A | 12      | 12621118 | A   | G     | T    | 1124 | D         | K                    | 0.135 | Likely Benign |
| SCN1A | 2   | 16682616 | T   | C   | 1126  | N    | Y    | 0.206     | Likely Benign        | SCN2A | 2   | 16621150 | G   | C   | 1123  | S    | C    | 0.131     | Likely Benign        | SCN3A | 12  | 12621118 | A   | G   | T     | 1124 | D    | K         | 0.135                | Likely Benign | SCN4A | 12      | 12621118 | A   | G     | T    | 1124 | D         | K                    | 0.135 | Likely Benign |
| SCN1A | 2   | 16682616 | T   | C   | 1126  | N    | Y    | 0.082     | Likely Benign        | SCN2A | 2   | 16621150 | G   | C   | 1123  | S    | C    | 0.131     | Likely Benign        | SCN3A | 12  | 12621118 | A   | G   | T     | 1124 | D    | K         | 0.135                | Likely Benign | SCN4A | 12      | 12621118 | A   | G     | T    | 1124 | D         | K                    | 0.135 | Likely Benign |
| SCN1A | 2   | 16682616 | T   | C   | 1126  | N    | Y    | 0.152     | Likely Benign        | SCN2A | 2   | 16621151 | A   | C   | 1123  | S    | R    | 0.476     | Likely Benign        | SCN3A | 12  | 12621118 | A   | G   | T     | 1124 | D    | K         | 0.135                | Likely Benign | SCN4A | 12      | 12621118 | A   | G     | T    | 1124 | D         | K                    | 0.135 | Likely Benign |
| SCN1A | 2   | 16682609 | A   | C   | 1126  | N    | K    | 0.279     | Likely Benign        | SCN2A | 2   | 16621151 | A   | C   | 1123  | S    | R    | 0.476     | Likely Benign        | SCN3A | 12  | 12621118 | A   | G   | T     | 1124 | D    | K         | 0.135                | Likely Benign | SCN4A | 12      | 12621118 | A   | G     | T    | 1124 | D         | K                    | 0.135 | Likely Benign |
| SCN1A | 2   | 16682608 | A   | T   | 1126  | N    | S    | 0.286     | Likely Benign        | SCN2A | 2   | 16621152 | A   | C   | 1124  | S    | G    | 0.353     | Likely Benign        | SCN3A | 12  | 12621118 | A   | G   | T     | 1124 | D    | K         | 0.135                | Likely Benign | SCN4A | 12      | 12621118 | A   | G     | T    | 1124 | D         | K                    | 0.135 | Likely Benign |
| SCN1A | 2   | 16682608 | A   | C   | 1127  | L    | V    | 0.057     | Likely Benign        | SCN2A | 2   | 16621152 | A   | G   | 1124  | S    | G    | 0.343     | Likely Benign        | SCN3A | 12  | 12621118 | A   | G   | T     | 1124 | D    | K         | 0.135                | Likely Benign | SCN4A | 12      | 12621118 | A   | G     | T    | 1124 | D         | K                    | 0.135 | Likely Benign |
| SCN1A | 2   | 16682607 | A   | T   | 1127  | L    | S    | 0.132     | Likely Benign        | SCN2A | 2   | 16621153 | G   | A   | 1124  | S    | N    | 0.34      | Likely Benign        | SCN3A | 12  | 12621118 | A   | G   | T     | 1124 | D    | K         | 0.135                | Likely Benign | SCN4A | 12      | 12621118 | A   | G     | T    | 1124 | D         | K                    | 0.135 | Likely Benign |
| SCN1A | 2   | 16682606 | A   | T   | 1127  | L    | F    | 0.132     | Likely Benign        | SCN2A | 2   | 16621153 | G   | A   | 1124  | S    | T    | 0.062     | Likely Benign        | SCN3A | 12  | 12621118 | A   | G   | T     | 1124 | D    | K         | 0.135                | Likely Benign | SCN4A | 12      | 12621118 | A   | G     | T    | 1124 | D         | K                    | 0.135 | Likely Benign |
| SCN1A | 2   | 16682606 | T   | G   | 1127  | N    | F    | 0.130     | Likely Benign        | SCN2A | 2   | 16621153 | G   | A   | 1124  | S    | T    | 0.062     | Likely Benign        | SCN3A | 12  | 12621118 | A   | G   | T     | 1124 | D    | K         | 0.135                | Likely Benign | SCN4A | 12      | 12621118 | A   | G     | T    | 1124 | D         | K                    | 0.135 | Likely Benign |
| SCN1A | 2   | 16682605 | A   | T   | 1128  | N    | Y    | 0.482     | Likely Benign        | SCN2A | 2   | 16621154 | C   | A   | 1124  | S    | R    | 0.535     | Likely Benign        | SCN3A | 12  | 12621118 | A   | G   | T     | 1124 | D    | K         | 0.135                | Likely Benign | SCN4A | 12      | 12621118 | A   | G     | T    | 1124 | D         | K                    | 0.135 | Likely Benign |
| SCN1A | 2   | 16682605 | T   | C   | 1128  | N    | H    | 0.082     | Likely Benign        | SCN2A | 2   | 16621154 | C   | A   | 1124  | S    | R    | 0.535     | Likely Benign        | SCN3A | 12  | 12621118 | A   | G   | T     | 1124 | D    | K         | 0.135                | Likely Benign | SCN4A | 12      | 12621118 | A   | G     | T    | 1124 | D         | K                    | 0.135 | Likely Benign |
| SCN1A | 2   | 16682605 | T   | G   | 1128  | N    | H    | 0.331     | Likely Benign        | SCN2A | 2   | 16621155 | G   | A   | 1125  | E    | K    | 0.069     | Likely Benign        | SCN3A | 12  | 12621118 | A   | G   | T     | 1124 | D    | K         | 0.135                | Likely Benign | SCN4A | 12      | 12621118 | A   | G     | T    | 1124 | D         | K                    | 0.135 | Likely Benign |
| SCN1A | 2   | 16682604 | T   | C   | 1128  | N    | I    | 0.410     | Likely Benign        | SCN2A | 2   | 16621155 | G   | A   | 1125  | E    | K    | 0.069     | Likely Benign        | SCN3A | 12  | 12621118 | A   | G   | T     | 1124 | D    | K         | 0.135                | Likely Benign | SCN4A | 12      | 12621118 | A   | G     | T    | 1124 | D         | K                    | 0.135 | Likely Benign |
| SCN1A | 2   | 16682604 | T   | C   | 1128  | N    | S    | 0.224     | Likely Benign        | SCN2A | 2   | 16621156 | A   | G   | 1125  | E    | G    | 0.276     | Likely Benign        | SCN3A | 12  | 12621118 | A   | G   | T     | 1124 | D    | K         | 0.135                | Likely Benign | SCN4A | 12      | 12621118 | A   | G     | T    | 1124 | D         | K                    | 0.135 | Likely Benign |
| SCN1A | 2   | 16682603 | G   | T   | 1128  | N    | T    | 0.103     | Likely Benign        | SCN2A | 2   | 16621156 | A   | G   | 1125  | E    | G    | 0.276     | Likely Benign        | SCN3A | 12  | 12621118 | A   | G   | T     | 1124 | D    | K         | 0.135                | Likely Benign | SCN4A | 12      | 12621118 | A   | G     | T    | 1124 | D         | K                    | 0.135 | Likely Benign |
| SCN1A | 2   | 16682603 | G   | T   | 1128  | N    | K    | 0.160     | Likely Benign        | SCN2A | 2   | 16621157 | G   | C   | 1125  | E    | D    | 0.047     | Likely Benign        | SCN3A | 12  | 12621118 | A   | G   | T     | 1124 | D    | K         | 0.135                | Likely Benign | SCN4A | 12      | 12621118 | A   | G     | T    | 1124 | D         | K                    | 0.135 | Likely Benign |
| SCN1A | 2   | 16682602 | T   | C   | 1129  | T    | S    | 0.060     | Likely Benign        | SCN2A | 2   | 16621157 | G   | C   | 1125  | E    | D    | 0.047     | Likely Benign        | SCN3A | 12  | 12621118 | A   | G   | T     | 1124 | D    | K         | 0.135                | Likely Benign | SCN4A | 12      | 12621118 | A   | G     | T    | 1124 | D         | K                    | 0.135 | Likely Benign |
| SCN1A | 2   | 16682602 | T   | C   | 1129  | T    | S    | 0.161     | Likely Benign        | SCN2A | 2   | 16621158 | T   | C   | 1126  | S    | P    | 0.133     | Likely Benign        | SCN3A | 12  | 12621118 | A   | G   | T     | 1124 | D    | K         | 0.135                | Likely Benign | SCN4A | 12      | 12621118 | A   | G     | T    | 1124 | D         | K                    | 0.135 | Likely Benign |
| SCN1A | 2   | 16682602 | T   | G   | 1129  | T    | P    | 0.301     | Likely Benign        | SCN2A | 2   | 16621158 | T   | C   | 1126  | S    | P    | 0.133     | Likely Benign        | SCN3A | 12  | 12621118 | A   | G   | T     | 1124 | D    | K         | 0.135                | Likely Benign | SCN4A | 12      | 12621118 | A   | G     | T    | 1124 | D         | K                    | 0.135 | Likely Benign |
| SCN1A | 2   | 16682601 | T   | C   | 1129  | T    | P    | 0.301     | Likely Benign        | SCN2A | 2   | 16621159 | C   | T   | 1126  | S    | L    | 0.226     | Likely Benign        | SCN3A | 12  | 12621118 | A   | G   | T     | 1124 | D    | K         | 0.135                | Likely Benign | SCN4A | 12      | 12621118 | A   | G     | T    | 1124 | D         | K                    | 0.135 | Likely Benign |
| SCN1A | 2   | 16682601 | G   | T   | 1129  | T    | P    | 0.180     | Likely Benign        | SCN2A | 2   | 16621159 | C   | T   | 1126  | S    | L    | 0.226     | Likely Benign        | SCN3A | 12  | 12621118 | A   | G   | T     | 1124 | D    | K         | 0.135                | Likely Benign | SCN4A | 12      | 12621118 | A   | G     | T    | 1124 | D         | K                    | 0.135 | Likely Benign |
| SCN1A | 2   | 16682601 | G   | T   | 1129  | T    | P    | 0.221     | Likely Benign        | SCN2A | 2   | 16621161 | G   | A   | 1127  | D    | N    | 0.084     | Likely Benign        | SCN3A | 12  | 12621118 | A   | G   | T     | 1124 | D    | K         | 0.135                | Likely Benign | SCN4A | 12      | 12621118 | A   | G     | T    | 1124 | D         | K                    | 0.135 | Likely Benign |
| SCN1A | 2   | 16682599 | E   | C   | 1130  | E    | K    | 0.284     | Likely Benign        | SCN2A | 2   | 16621161 | G   | A   | 1127  | D    | N    | 0.084     | Likely Benign        | SCN3A | 12  | 12621118 | A   | G   | T     | 1124 | D    | K         | 0.135                | Likely Benign | SCN4A | 12      | 12621118 | A   | G     | T    | 1124 | D         | K                    | 0.135 | Likely Benign |
| SCN1A | 2   | 16682599 | E   | C   | 1130  | E    | K    | 0.300     | Likely Benign        | SCN2A | 2   | 16621162 | S   | C   | 1127  | D    | Y    | 0.415     | Likely Benign        | SCN3A | 12  | 12621118 | A   | G   | T     | 1124 | D    | K         | 0.135                | Likely Benign | SCN4A | 12      | 12621118 | A   | G     | T    | 1124 | D         | K                    | 0.135 | Likely Benign |
| SCN1A | 2   | 16682598 | T   | C   | 1130  | E    | G    | 0.503     | Likely Benign        | SCN2A | 2   | 16621162 | S   | C   | 1127  | D    | Y    | 0.415     | Likely Benign        | SCN3A | 12  | 12621118 | A   | G   | T     | 1124 | D    | K         | 0.135                | Likely Benign | SCN4A | 12      | 12621118 | A   | G     | T    | 1124 | D         | K                    | 0.135 | Likely Benign |
| SCN1A | 2   | 16682598 | T   | G   | 1130  | E    | G    | 0.665     | Likely Benign        | SCN2A | 2   | 16621162 | S   | C   | 1127  | D    | Y    | 0.415     | Likely Benign        | SCN3A | 12  | 12621118 | A   | G   | T     | 1124 | D    | K         | 0.135                | Likely Benign | SCN4A | 12      | 12621118 | A   | G     | T    | 1124 | D         | K                    | 0.135 | Likely Benign |
| SCN1A | 2   | 16682598 | T   | G   | 1130  | E    | G    | 0.451     | Likely Benign        | SCN2A | 2   | 16621162 | S   | C   | 1127  | D    | Y    | 0.415     | Likely Benign        | SCN3A | 12  | 12621118 | A   | G   | T     | 1124 | D    | K         | 0.135                | Likely Benign | SCN4A | 12      | 12621118 | A   | G     | T    | 1124 | D         | K                    | 0.135 | Likely Benign |
| SCN1A | 2   | 16682597 | E   | C   | 1131  | D    | H    | 0.094     | Likely Benign        | SCN2A | 2   | 16621163 | T   | G   | 1127  | D    | E    | 0.032     | Likely Benign        | SCN3A | 12  | 12621118 | A   | G   | T     | 1124 | D    | K         | 0.135                | Likely Benign | SCN4A | 12      | 12621118 | A   | G     | T    | 1124 | D         | K                    | 0.135 | Likely Benign |
| SCN1A | 2   | 16682597 | E   | C   | 1131  | D    | H    | 0.094     | Likely Benign        | SCN2A | 2   | 16621163 | T   | G   | 1127  | D    | E    | 0.032     | Likely Benign        | SCN3A | 12  | 12621118 | A   | G   | T     | 11   |      |           |                      |               |       |         |          |     |       |      |      |           |                      |       |               |

| GENE  | CHR | DNA_LOC  | REF | ALT | Amino | AA_R | AA_L | SCN Index | SCN Index Prediction | GENE  | CHR | DNA_LOC  | REF | ALT | Amino | AA_R | AA_L | SCN Index | SCN Index Prediction | GENE  | CHR | DNA_LOC  | REF | ALT | Amino | AA_R  | AA_L | SCN Index | SCN Index Prediction |                   |
|-------|-----|----------|-----|-----|-------|------|------|-----------|----------------------|-------|-----|----------|-----|-----|-------|------|------|-----------|----------------------|-------|-----|----------|-----|-----|-------|-------|------|-----------|----------------------|-------------------|
| SCN2A | 2   | 16687216 | A   | T   | G1151 | S    | P    | 0.933     | Likely Benign        | SCN2A | 2   | 16622199 | G   | A   | G1149 | G    | E    | 0.018     | Likely Benign        | SCN2A | 12  | 12163735 | G   | C   | G     | T1152 | E    | D         | 0.092                | Likely Benign     |
| SCN2A | 2   | 16687216 | A   | T   | G1151 | S    | P    | 0.482     | Likely Benign        | SCN2A | 2   | 16622199 | G   | A   | G1149 | G    | A    | 0.014     | Likely Benign        | SCN2A | 12  | 12163735 | G   | C   | T     | G1152 | E    | D         | 0.094                | Likely Benign     |
| SCN2A | 2   | 16687216 | A   | T   | G1151 | S    | P    | 0.704     | Likely Benign        | SCN2A | 2   | 16622199 | G   | A   | G1149 | G    | A    | 0.046     | Likely Benign        | SCN2A | 12  | 12163736 | G   | C   | T     | G1153 | E    | D         | 0.149                | Likely Benign     |
| SCN2A | 2   | 16687213 | A   | C   | T1152 | S    | A    | 0.704     | Likely Benign        | SCN2A | 2   | 16622170 | G   | A   | T1150 | A    | P    | 0.046     | Likely Benign        | SCN2A | 12  | 12163736 | G   | C   | T     | G1153 | E    | Q         | 0.621                | Likely Benign     |
| SCN2A | 2   | 16687213 | A   | C   | T1152 | S    | A    | 0.704     | Likely Benign        | SCN2A | 2   | 16622170 | G   | A   | T1150 | A    | P    | 0.046     | Likely Benign        | SCN2A | 12  | 12163737 | G   | C   | T     | G1153 | E    | Q         | 0.621                | Likely Benign     |
| SCN2A | 2   | 16687213 | A   | T   | G1152 | S    | P    | 0.879     | Likely Pathogenic    | SCN2A | 2   | 16622171 | G   | T   | T1151 | A    | S    | 0.032     | Likely Benign        | SCN2A | 12  | 12163737 | A   | G   | T     | G1153 | E    | G         | 0.871                | Likely Pathogenic |
| SCN2A | 2   | 16687212 | G   | A   | T1152 | S    | L    | 0.801     | Likely Pathogenic    | SCN2A | 2   | 16622170 | G   | A   | T1150 | A    | P    | 0.025     | Likely Benign        | SCN2A | 12  | 12163737 | A   | T   | G1153 | E     | V    | 0.719     | Likely Benign        |                   |
| SCN2A | 2   | 16687213 | A   | T   | G1153 | E    | K    | 0.854     | Likely Pathogenic    | SCN2A | 2   | 16622170 | G   | T   | T1151 | A    | S    | 0.046     | Likely Benign        | SCN2A | 12  | 12163738 | A   | T   | G1153 | E     | D    | 0.097     | Likely Benign        |                   |
| SCN2A | 2   | 16687213 | A   | T   | G1153 | E    | K    | 0.854     | Likely Pathogenic    | SCN2A | 2   | 16622170 | G   | T   | T1151 | A    | S    | 0.046     | Likely Benign        | SCN2A | 12  | 12163738 | A   | T   | G1153 | E     | D    | 0.097     | Likely Benign        |                   |
| SCN2A | 2   | 16687220 | T   | G   | T1153 | E    | G    | 0.656     | Likely Benign        | SCN2A | 2   | 16622170 | G   | C   | G1151 | P    | A    | 0.071     | Likely Benign        | SCN2A | 12  | 12163739 | T   | G   | T1154 | Y     | H    | 0.061     | Likely Benign        |                   |
| SCN2A | 2   | 16687220 | T   | G   | T1153 | E    | G    | 0.738     | Likely Benign        | SCN2A | 2   | 16622170 | G   | T   | T1151 | P    | S    | 0.092     | Likely Benign        | SCN2A | 12  | 12163739 | T   | G   | T1154 | Y     | D    | 0.051     | Likely Benign        |                   |
| SCN2A | 2   | 16687220 | T   | G   | T1153 | E    | G    | 0.738     | Likely Benign        | SCN2A | 2   | 16622170 | G   | T   | T1151 | P    | S    | 0.092     | Likely Benign        | SCN2A | 12  | 12163740 | T   | G   | T1154 | Y     | D    | 0.051     | Likely Benign        |                   |
| SCN2A | 2   | 16687220 | T   | G   | T1153 | E    | G    | 0.258     | Likely Benign        | SCN2A | 2   | 16622170 | G   | C   | G1151 | P    | R    | 0.253     | Likely Benign        | SCN2A | 12  | 12163740 | A   | G   | T1154 | Y     | C    | 0.147     | Likely Benign        |                   |
| SCN2A | 2   | 16687207 | C   | G   | T1154 | S    | R    | 0.166     | Likely Benign        | SCN2A | 2   | 16622171 | G   | A   | T1153 | E    | V    | 0.335     | Likely Benign        | SCN2A | 12  | 12163740 | A   | G   | T1154 | Y     | C    | 0.147     | Likely Benign        |                   |
| SCN2A | 2   | 16687207 | C   | G   | T1154 | S    | R    | 0.166     | Likely Benign        | SCN2A | 2   | 16622170 | G   | A   | T1152 | A    | P    | 0.05      | Likely Benign        | SCN2A | 12  | 12163742 | A   | G   | T1155 | L     | M    | 0.042     | Likely Benign        |                   |
| SCN2A | 2   | 16687207 | C   | G   | T1154 | S    | R    | 0.166     | Likely Benign        | SCN2A | 2   | 16622170 | G   | C   | G1152 | A    | P    | 0.035     | Likely Benign        | SCN2A | 12  | 12163742 | T   | G   | T1155 | L     | V    | 0.036     | Likely Benign        |                   |
| SCN2A | 2   | 16687206 | C   | A   | T1154 | S    | V    | 0.684     | Likely Benign        | SCN2A | 2   | 16622170 | G   | A   | T1152 | A    | P    | 0.035     | Likely Benign        | SCN2A | 12  | 12163742 | T   | G   | T1155 | L     | V    | 0.036     | Likely Benign        |                   |
| SCN2A | 2   | 16687206 | C   | G   | T1154 | S    | V    | 0.684     | Likely Benign        | SCN2A | 2   | 16622170 | G   | A   | T1152 | A    | P    | 0.035     | Likely Benign        | SCN2A | 12  | 12163743 | T   | G   | T1156 | D     | N    | 0.104     | Likely Benign        |                   |
| SCN2A | 2   | 16687206 | C   | G   | T1154 | S    | V    | 0.684     | Likely Benign        | SCN2A | 2   | 16622170 | G   | A   | T1152 | A    | P    | 0.035     | Likely Benign        | SCN2A | 12  | 12163743 | T   | G   | T1156 | D     | N    | 0.104     | Likely Benign        |                   |
| SCN2A | 2   | 16687206 | C   | G   | T1154 | S    | V    | 0.684     | Likely Benign        | SCN2A | 2   | 16622170 | G   | A   | T1152 | A    | P    | 0.035     | Likely Benign        | SCN2A | 12  | 12163743 | T   | G   | T1156 | D     | N    | 0.104     | Likely Benign        |                   |
| SCN2A | 2   | 16687206 | C   | G   | T1154 | S    | V    | 0.684     | Likely Benign        | SCN2A | 2   | 16622170 | G   | A   | T1152 | A    | P    | 0.035     | Likely Benign        | SCN2A | 12  | 12163743 | T   | G   | T1156 | D     | N    | 0.104     | Likely Benign        |                   |
| SCN2A | 2   | 16687206 | C   | G   | T1154 | S    | V    | 0.684     | Likely Benign        | SCN2A | 2   | 16622170 | G   | A   | T1152 | A    | P    | 0.035     | Likely Benign        | SCN2A | 12  | 12163743 | T   | G   | T1156 | D     | N    | 0.104     | Likely Benign        |                   |
| SCN2A | 2   | 16687206 | C   | G   | T1154 | S    | V    | 0.684     | Likely Benign        | SCN2A | 2   | 16622170 | G   | A   | T1152 | A    | P    | 0.035     | Likely Benign        | SCN2A | 12  | 12163743 | T   | G   | T1156 | D     | N    | 0.104     | Likely Benign        |                   |
| SCN2A | 2   | 16687206 | C   | G   | T1154 | S    | V    | 0.684     | Likely Benign        | SCN2A | 2   | 16622170 | G   | A   | T1152 | A    | P    | 0.035     | Likely Benign        | SCN2A | 12  | 12163743 | T   | G   | T1156 | D     | N    | 0.104     | Likely Benign        |                   |
| SCN2A | 2   | 16687206 | C   | G   | T1154 | S    | V    | 0.684     | Likely Benign        | SCN2A | 2   | 16622170 | G   | A   | T1152 | A    | P    | 0.035     | Likely Benign        | SCN2A | 12  | 12163743 | T   | G   | T1156 | D     | N    | 0.104     | Likely Benign        |                   |
| SCN2A | 2   | 16687206 | C   | G   | T1154 | S    | V    | 0.684     | Likely Benign        | SCN2A | 2   | 16622170 | G   | A   | T1152 | A    | P    | 0.035     | Likely Benign        | SCN2A | 12  | 12163743 | T   | G   | T1156 | D     | N    | 0.104     | Likely Benign        |                   |
| SCN2A | 2   | 16687206 | C   | G   | T1154 | S    | V    | 0.684     | Likely Benign        | SCN2A | 2   | 16622170 | G   | A   | T1152 | A    | P    | 0.035     | Likely Benign        | SCN2A | 12  | 12163743 | T   | G   | T1156 | D     | N    | 0.104     | Likely Benign        |                   |
| SCN2A | 2   | 16687206 | C   | G   | T1154 | S    | V    | 0.684     | Likely Benign        | SCN2A | 2   | 16622170 | G   | A   | T1152 | A    | P    | 0.035     | Likely Benign        | SCN2A | 12  | 12163743 | T   | G   | T1156 | D     | N    | 0.104     | Likely Benign        |                   |
| SCN2A | 2   | 16687206 | C   | G   | T1154 | S    | V    | 0.684     | Likely Benign        | SCN2A | 2   | 16622170 | G   | A   | T1152 | A    | P    | 0.035     | Likely Benign        | SCN2A | 12  | 12163743 | T   | G   | T1156 | D     | N    | 0.104     | Likely Benign        |                   |
| SCN2A | 2   | 16687206 | C   | G   | T1154 | S    | V    | 0.684     | Likely Benign        | SCN2A | 2   | 16622170 | G   | A   | T1152 | A    | P    | 0.035     | Likely Benign        | SCN2A | 12  | 12163743 | T   | G   | T1156 | D     | N    | 0.104     | Likely Benign        |                   |
| SCN2A | 2   | 16687206 | C   | G   | T1154 | S    | V    | 0.684     | Likely Benign        | SCN2A | 2   | 16622170 | G   | A   | T1152 | A    | P    | 0.035     | Likely Benign        | SCN2A | 12  | 12163743 | T   | G   | T1156 | D     | N    | 0.104     | Likely Benign        |                   |
| SCN2A | 2   | 16687206 | C   | G   | T1154 | S    | V    | 0.684     | Likely Benign        | SCN2A | 2   | 16622170 | G   | A   | T1152 | A    | P    | 0.035     | Likely Benign        | SCN2A | 12  | 12163743 | T   | G   | T1156 | D     | N    | 0.104     | Likely Benign        |                   |
| SCN2A | 2   | 16687206 | C   | G   | T1154 | S    | V    | 0.684     | Likely Benign        | SCN2A | 2   | 16622170 | G   | A   | T1152 | A    | P    | 0.035     | Likely Benign        | SCN2A | 12  | 12163743 | T   | G   | T1156 | D     | N    | 0.104     | Likely Benign        |                   |
| SCN2A | 2   | 16687206 | C   | G   | T1154 | S    | V    | 0.684     | Likely Benign        | SCN2A | 2   | 16622170 | G   | A   | T1152 | A    | P    | 0.035     | Likely Benign        | SCN2A | 12  | 12163743 | T   | G   | T1156 | D     | N    | 0.104     | Likely Benign        |                   |
| SCN2A | 2   | 16687206 | C   | G   | T1154 | S    | V    | 0.684     | Likely Benign        | SCN2A | 2   | 16622170 | G   | A   | T1152 | A    | P    | 0.035     | Likely Benign        | SCN2A | 12  | 12163743 | T   | G   | T1156 | D     | N    | 0.104     | Likely Benign        |                   |
| SCN2A | 2   | 16687206 | C   | G   | T1154 | S    | V    | 0.684     | Likely Benign        | SCN2A | 2   | 16622170 | G   | A   | T1152 | A    | P    | 0.035     | Likely Benign        | SCN2A | 12  | 12163743 | T   | G   | T1156 | D     | N    | 0.104     | Likely Benign        |                   |
| SCN2A | 2   | 16687206 | C   | G   | T1154 | S    | V    | 0.684     | Likely Benign        | SCN2A | 2   | 16622170 | G   | A   | T1152 | A    | P    | 0.035     | Likely Benign        | SCN2A | 12  | 12163743 | T   | G   | T1156 | D     | N    | 0.104     | Likely Benign        |                   |
| SCN2A | 2   | 16687206 | C   | G   | T1154 | S    | V    | 0.684     | Likely Benign        | SCN2A | 2   | 16622170 | G   | A   | T1152 | A    | P    | 0.035     | Likely Benign        | SCN2A | 12  | 12163743 | T   | G   | T1156 | D     | N    | 0.104     | Likely Benign        |                   |
| SCN2A | 2   | 16687206 | C   | G   | T1154 | S    | V    | 0.684     | Likely Benign        | SCN2A | 2   | 16622170 | G   | A   | T1152 | A    | P    | 0.035     | Likely Benign        | SCN2A | 12  | 12163743 | T   | G   | T1156 | D     | N    | 0.104     | Likely Benign        |                   |
| SCN2A | 2   | 16687206 | C   | G   | T1154 | S    | V    | 0.684     | Likely Benign        | SCN2A | 2   | 16622170 | G   | A   | T1152 | A    | P    | 0.035     | Likely Benign        | SCN2A | 12  | 12163743 | T   | G   | T1156 | D     | N    | 0.104     | Likely Benign        |                   |
| SCN2A | 2   | 16687206 | C   | G   | T1154 | S    | V    | 0.684     | Likely Benign        | SCN2A | 2   | 16622170 | G   | A   | T1152 | A    | P    | 0.035     | Likely Benign        | SCN2A | 12  | 12163743 | T   | G   | T1156 | D     | N    | 0.104     | Likely Benign        |                   |
| SCN2A | 2   | 16687206 | C   | G   | T1154 | S    | V    | 0.684     | Likely Benign        | SCN2A | 2   | 16622170 | G   | A   | T1152 | A    | P    | 0.035     | Likely Benign        | SCN2A | 12  | 12163743 | T   | G   | T1156 | D     | N    | 0.104     | Likely Benign        |                   |
| SCN2A | 2   | 16687206 | C   | G   | T1154 | S    | V    | 0.684     | Likely Benign        | SCN2A | 2   | 16622170 | G   | A   | T1152 | A    | P    | 0.035     | Likely Benign        | SCN2A | 12  | 12163743 | T   | G   | T1156 | D     | N    | 0.104     | Likely Benign        |                   |
| SCN2A | 2   | 16687206 | C   | G   | T1154 | S    | V    | 0.684     | Likely Benign        | SCN2A | 2   | 16622170 | G   | A   | T1152 | A    | P    | 0.035     | Likely Benign        | SCN2A | 12  | 12163743 | T   | G   | T1156 | D     | N    | 0.104     | Likely Benign        |                   |
| SCN2A | 2   | 16687206 | C   | G   | T1154 | S    | V    | 0.684     | Likely Benign        | SCN2A | 2   | 16622170 | G   | A   | T1152 | A    | P    | 0.035     | Likely Benign        | SCN2A | 12  | 12163743 | T   | G   | T1156 | D     | N    | 0.104     | Likely Benign        |                   |
| SCN2A | 2   | 16687206 | C   | G   | T1154 | S    | V    | 0.684     | Likely Benign        | SCN2A | 2   | 16622170 | G   | A   | T1152 | A    | P    | 0.035     | Likely Benign        | SCN2A | 12  | 12163743 | T   | G   | T1156 | D     | N    | 0.104     | Likely Benign        |                   |
| SCN2A | 2   | 16687206 | C   | G   | T1154 | S    | V    | 0.684     | Likely Benign        | SCN2A | 2   | 16622170 | G   | A   | T1152 | A    | P    | 0.035     | Likely Benign        | SCN2A | 12  | 12163743 | T   | G   | T1156 | D     | N    | 0.104     | Likely Benign        |                   |
| SCN2A | 2   | 16687206 | C   | G   | T1154 | S    | V    | 0.684     | Likely Benign        | SCN2A | 2   | 16622170 | G   | A   | T1152 | A    | P    | 0.035     | Likely Benign        | SCN2A | 12  | 12163743 | T   | G   | T1156 | D     | N    | 0.104     | Likely Benign        |                   |
| SCN2A | 2   | 16687206 | C   | G   | T1154 | S    | V    | 0.684     | Likely Benign        | SCN2A | 2   | 16622170 | G   | A   | T1152 | A    | P    | 0.035     | Likely Benign        | SCN2A | 12  | 12163743 | T   | G   | T1156 | D     | N    | 0.104     | Likely Benign        |                   |
| SCN2A | 2   | 16687206 | C   | G   | T1154 | S    | V    | 0.684     | Likely Benign        | SCN2A | 2   | 16622170 | G   | A   | T1152 | A    | P    | 0.035     | Likely Benign        | SCN2A | 12  | 12163743 | T   | G   | T1156 | D     | N    | 0.104     | Likely Benign        |                   |
| SCN2A | 2   | 16687206 | C   | G   | T1154 | S    | V    | 0.684     | Likely Benign        | SCN2A | 2   | 16622170 | G   | A   | T1152 | A    | P    | 0.035     | Likely Benign        | SCN2A | 12  | 12163743 | T   | G   | T1156 | D     | N    | 0.104     | Likely Benign        |                   |
| SCN2A | 2   | 16687206 | C   | G   | T1154 | S    | V    | 0.684     | Likely Benign        | SCN2A | 2   | 16622170 | G   | A   | T1152 | A    | P    | 0.035     | Likely Benign        | SCN2A | 12  | 12163743 | T   | G   | T1156 | D     | N    | 0.104     | Likely Benign        |                   |
| SCN2A | 2   |          |     |     |       |      |      |           |                      |       |     |          |     |     |       |      |      |           |                      |       |     |          |     |     |       |       |      |           |                      |                   |



[illegible]











| Gene  | Position  | RefSeq ID    | Accession | Score | Category          |
|-------|-----------|--------------|-----------|-------|-------------------|
| PENK1 | 108693047 | NM_001101111 | 100%      | 0.993 | Likely Pathogenic |
| PENK1 | 108693047 | NM_001101111 | 100%      | 0.993 | Likely Pathogenic |
| PENK1 | 108693047 | NM_001101111 | 100%      | 0.992 | Likely Pathogenic |







| GENE  | CHR | DNA LOC  | REF. | ALT | Amino | AA R | AA L | SCN Index | SCN Index Prediction | GENE  | CHR | DNA LOC  | REF. | ALT | Amino | AA R | AA L | SCN Index | SCN Index Prediction | GENE  | CHR | DNA LOC  | REF. | ALT | Amino | AA R | AA L | SCN Index | SCN Index Prediction |
|-------|-----|----------|------|-----|-------|------|------|-----------|----------------------|-------|-----|----------|------|-----|-------|------|------|-----------|----------------------|-------|-----|----------|------|-----|-------|------|------|-----------|----------------------|
| SCN2A | 2   | 16682453 | T    | G   | 1491  | K    | E    | 0.934     | Likely Pathogenic    | SCN2A | 2   | 16623718 | A    | T   | 1488  | I    | F    | 0.523     | Likely Benign        | SCN2A | 12  | 12182422 | T    | G   | 1488  | Y    | H    | 0.979     | Likely Pathogenic    |
| SCN2A | 2   | 16682455 | T    | G   | 1491  | K    | Q    | 0.874     | Likely Pathogenic    | SCN2A | 2   | 16623718 | A    | T   | 1488  | I    | F    | 0.573     | Likely Pathogenic    | SCN2A | 12  | 12182424 | T    | G   | 1488  | Y    | D    | 0.981     | Likely Pathogenic    |
| SCN2A | 2   | 16682457 | T    | G   | 1491  | K    | R    | 0.713     | Likely Benign        | SCN2A | 2   | 16623719 | T    | G   | 1488  | I    | N    | 0.589     | Likely Pathogenic    | SCN2A | 12  | 12182425 | A    | G   | 1488  | Y    | D    | 0.981     | Likely Pathogenic    |
| SCN2A | 2   | 16682458 | T    | G   | 1491  | K    | R    | 0.713     | Likely Benign        | SCN2A | 2   | 16623720 | T    | G   | 1488  | I    | T    | 0.537     | Likely Pathogenic    | SCN2A | 12  | 12182426 | A    | G   | 1488  | Y    | C    | 0.976     | Likely Pathogenic    |
| SCN2A | 2   | 16682459 | T    | G   | 1491  | K    | N    | 0.979     | Likely Pathogenic    | SCN2A | 2   | 16623721 | T    | G   | 1488  | I    | M    | 0.543     | Likely Benign        | SCN2A | 12  | 12182427 | T    | G   | 1488  | Y    | N    | 0.919     | Likely Pathogenic    |
| SCN2A | 2   | 16682460 | T    | G   | 1491  | K    | N    | 0.928     | Likely Pathogenic    | SCN2A | 2   | 16623722 | T    | G   | 1489  | F    | I    | 0.982     | Likely Pathogenic    | SCN2A | 12  | 12182428 | T    | G   | 1489  | Y    | H    | 0.929     | Likely Pathogenic    |
| SCN2A | 2   | 16682461 | T    | G   | 1491  | K    | N    | 0.928     | Likely Pathogenic    | SCN2A | 2   | 16623723 | T    | G   | 1489  | F    | V    | 0.984     | Likely Pathogenic    | SCN2A | 12  | 12182429 | T    | G   | 1489  | Y    | H    | 0.929     | Likely Pathogenic    |
| SCN2A | 2   | 16682462 | T    | G   | 1491  | K    | Q    | 0.975     | Likely Pathogenic    | SCN2A | 2   | 16623724 | T    | G   | 1490  | M    | V    | 0.981     | Likely Pathogenic    | SCN2A | 12  | 12182430 | A    | G   | 1489  | Y    | S    | 0.962     | Likely Pathogenic    |
| SCN2A | 2   | 16682463 | T    | G   | 1492  | K    | R    | 0.974     | Likely Pathogenic    | SCN2A | 2   | 16623725 | T    | G   | 1490  | M    | L    | 0.982     | Likely Pathogenic    | SCN2A | 12  | 12182431 | A    | G   | 1490  | N    | S    | 0.943     | Likely Pathogenic    |
| SCN2A | 2   | 16682464 | T    | G   | 1492  | K    | R    | 0.974     | Likely Pathogenic    | SCN2A | 2   | 16623726 | T    | G   | 1490  | M    | L    | 0.982     | Likely Pathogenic    | SCN2A | 12  | 12182432 | T    | G   | 1490  | N    | S    | 0.943     | Likely Pathogenic    |
| SCN2A | 2   | 16682465 | T    | G   | 1492  | K    | R    | 0.974     | Likely Pathogenic    | SCN2A | 2   | 16623727 | T    | G   | 1491  | T    | S    | 0.985     | Likely Pathogenic    | SCN2A | 12  | 12182433 | T    | G   | 1491  | N    | K    | 0.929     | Likely Pathogenic    |
| SCN2A | 2   | 16682466 | T    | G   | 1492  | K    | R    | 0.974     | Likely Pathogenic    | SCN2A | 2   | 16623728 | T    | G   | 1491  | T    | R    | 0.99      | Likely Pathogenic    | SCN2A | 12  | 12182434 | T    | G   | 1491  | N    | K    | 0.929     | Likely Pathogenic    |
| SCN2A | 2   | 16682467 | T    | G   | 1492  | K    | R    | 0.974     | Likely Pathogenic    | SCN2A | 2   | 16623729 | T    | G   | 1491  | T    | S    | 0.985     | Likely Pathogenic    | SCN2A | 12  | 12182435 | T    | G   | 1491  | N    | K    | 0.929     | Likely Pathogenic    |
| SCN2A | 2   | 16682468 | T    | G   | 1492  | K    | R    | 0.974     | Likely Pathogenic    | SCN2A | 2   | 16623730 | T    | G   | 1492  | E    | Q    | 0.979     | Likely Pathogenic    | SCN2A | 12  | 12182436 | T    | G   | 1491  | N    | K    | 0.929     | Likely Pathogenic    |
| SCN2A | 2   | 16682469 | T    | G   | 1492  | K    | R    | 0.974     | Likely Pathogenic    | SCN2A | 2   | 16623731 | A    | G   | 1492  | E    | A    | 0.979     | Likely Pathogenic    | SCN2A | 12  | 12182437 | T    | G   | 1492  | M    | R    | 0.981     | Likely Pathogenic    |
| SCN2A | 2   | 16682470 | T    | G   | 1492  | K    | R    | 0.974     | Likely Pathogenic    | SCN2A | 2   | 16623732 | T    | G   | 1492  | E    | V    | 0.941     | Likely Pathogenic    | SCN2A | 12  | 12182438 | T    | G   | 1492  | M    | R    | 0.981     | Likely Pathogenic    |
| SCN2A | 2   | 16682471 | T    | G   | 1492  | K    | R    | 0.974     | Likely Pathogenic    | SCN2A | 2   | 16623733 | T    | G   | 1492  | E    | D    | 0.769     |                      |       |     |          |      |     |       |      |      |           |                      |











| GENE  | CHR | DNA_LOC   | REF | ALT | Amino | AA_R | AA_L | SCN Index | SCN Index Prediction | GENE  | CHR | DNA_LOC   | REF | ALT | Amino | AA_R | AA_L | SCN Index | SCN Index Prediction | GENE  | CHR | DNA_LOC   | REF | ALT | Amino | AA_R | AA_L | SCN Index | SCN Index Prediction |
|-------|-----|-----------|-----|-----|-------|------|------|-----------|----------------------|-------|-----|-----------|-----|-----|-------|------|------|-----------|----------------------|-------|-----|-----------|-----|-----|-------|------|------|-----------|----------------------|
| SCN2A | 2   | 166848802 | A   | T   | 1661  | F    | L    | 0.880     | Likely Pathogenic    | SCN2A | 2   | 166283283 | C   | T   | 1656  | S    | C    | 0.993     | Likely Pathogenic    | SCN2A | 12  | 122020313 | G   | T   | 1655  | G    | C    | 0.640     | Likely Benign        |
| SCN2A | 2   | 166848802 | A   | T   | 1661  | F    | L    | 0.880     | Likely Pathogenic    | SCN2A | 2   | 166283283 | C   | T   | 1656  | S    | F    | 0.995     | Likely Pathogenic    | SCN2A | 12  | 122020324 | A   | G   | 1655  | G    | D    | 0.991     | Likely Benign        |
| SCN2A | 2   | 166848802 | A   | T   | 1661  | F    | L    | 0.880     | Likely Pathogenic    | SCN2A | 2   | 166283283 | C   | T   | 1656  | S    | F    | 0.995     | Likely Pathogenic    | SCN2A | 12  | 122020334 | G   | T   | 1655  | G    | D    | 0.991     | Likely Benign        |
| SCN2A | 2   | 166848800 | C   | G   | 1662  | A    | P    | 0.987     | Likely Pathogenic    | SCN2A | 2   | 166283283 | C   | G   | 1657  | L    | V    | 0.932     | Likely Pathogenic    | SCN2A | 12  | 122020334 | G   | T   | 1655  | G    | D    | 0.991     | Likely Benign        |
| SCN2A | 2   | 166848800 | C   | G   | 1662  | A    | P    | 0.987     | Likely Pathogenic    | SCN2A | 2   | 166283283 | C   | G   | 1657  | L    | V    | 0.932     | Likely Pathogenic    | SCN2A | 12  | 122020334 | G   | T   | 1655  | G    | D    | 0.991     | Likely Benign        |
| SCN2A | 2   | 166848800 | G   | A   | 1662  | A    | V    | 0.972     | Likely Pathogenic    | SCN2A | 2   | 166283286 | A   | A   | 1657  | L    | H    | 0.994     | Likely Pathogenic    | SCN2A | 12  | 122020336 | C   | G   | 1656  | L    | V    | 0.984     | Likely Pathogenic    |
| SCN2A | 2   | 166848800 | G   | A   | 1662  | A    | V    | 0.972     | Likely Pathogenic    | SCN2A | 2   | 166283286 | A   | A   | 1657  | L    | H    | 0.994     | Likely Pathogenic    | SCN2A | 12  | 122020336 | C   | G   | 1656  | L    | V    | 0.984     | Likely Pathogenic    |
| SCN2A | 2   | 166848800 | G   | A   | 1662  | A    | V    | 0.972     | Likely Pathogenic    | SCN2A | 2   | 166283286 | A   | A   | 1657  | L    | H    | 0.994     | Likely Pathogenic    | SCN2A | 12  | 122020336 | C   | G   | 1656  | L    | V    | 0.984     | Likely Pathogenic    |
| SCN2A | 2   | 166848800 | G   | A   | 1662  | A    | V    | 0.972     | Likely Pathogenic    | SCN2A | 2   | 166283286 | A   | A   | 1657  | L    | H    | 0.994     | Likely Pathogenic    | SCN2A | 12  | 122020336 | C   | G   | 1656  | L    | V    | 0.984     | Likely Pathogenic    |
| SCN2A | 2   | 166848800 | G   | A   | 1662  | A    | V    | 0.972     | Likely Pathogenic    | SCN2A | 2   | 166283286 | A   | A   | 1657  | L    | H    | 0.994     | Likely Pathogenic    | SCN2A | 12  | 122020336 | C   | G   | 1656  | L    | V    | 0.984     | Likely Pathogenic    |
| SCN2A | 2   | 166848800 | G   | A   | 1662  | A    | V    | 0.972     | Likely Pathogenic    | SCN2A | 2   | 166283286 | A   | A   | 1657  | L    | H    | 0.994     | Likely Pathogenic    | SCN2A | 12  | 122020336 | C   | G   | 1656  | L    | V    | 0.984     | Likely Pathogenic    |
| SCN2A | 2   | 166848800 | G   | A   | 1662  | A    | V    | 0.972     | Likely Pathogenic    | SCN2A | 2   | 166283286 | A   | A   | 1657  | L    | H    | 0.994     | Likely Pathogenic    | SCN2A | 12  | 122020336 | C   | G   | 1656  | L    | V    | 0.984     | Likely Pathogenic    |
| SCN2A | 2   | 166848800 | G   | A   | 1662  | A    | V    | 0.972     | Likely Pathogenic    | SCN2A | 2   | 166283286 | A   | A   | 1657  | L    | H    | 0.994     | Likely Pathogenic    | SCN2A | 12  | 122020336 | C   | G   | 1656  | L    | V    | 0.984     | Likely Pathogenic    |
| SCN2A | 2   | 166848800 | G   | A   | 1662  | A    | V    | 0.972     | Likely Pathogenic    | SCN2A | 2   | 166283286 | A   | A   | 1657  | L    | H    | 0.994     | Likely Pathogenic    | SCN2A | 12  | 122020336 | C   | G   | 1656  | L    | V    | 0.984     | Likely Pathogenic    |
| SCN2A | 2   | 166848800 | G   | A   | 1662  | A    | V    | 0.972     | Likely Pathogenic    | SCN2A | 2   | 166283286 | A   | A   | 1657  | L    | H    | 0.994     | Likely Pathogenic    | SCN2A | 12  | 122020336 | C   | G   | 1656  | L    | V    | 0.984     | Likely Pathogenic    |
| SCN2A | 2   | 166848800 | G   | A   | 1662  | A    | V    | 0.972     | Likely Pathogenic    | SCN2A | 2   | 166283286 | A   | A   | 1657  | L    | H    | 0.994     | Likely Pathogenic    | SCN2A | 12  | 122020336 | C   | G   | 1656  | L    | V    | 0.984     | Likely Pathogenic    |
| SCN2A | 2   | 166848800 | G   | A   | 1662  | A    | V    | 0.972     | Likely Pathogenic    | SCN2A | 2   | 166283286 |     |     |       |      |      |           |                      |       |     |           |     |     |       |      |      |           |                      |



| GENE  |     |           |      |      |       |      |      |           |                      |    |    |       |     |           |      |      |       |      |      |           |                      |    |    |       |     |           |      |      |       | GENE |      |           |                      |    |    |       |     |           |      |      |       |      |      |           |                      |    |    |  |  |  |  |  |  |  |  |  |  |  |  | GENE |  |  |  |  |  |  |  |  |  |  |  |  |  |  |  |  |  |  |  |  |  |  |  |  |  |  |  |  |  | GENE |  |  |  |  |  |  |  |  |  |  |  |  |  |  |  |  |  |  |  |  |  |  |  |  |  |  |  |  |  |
|-------|-----|-----------|------|------|-------|------|------|-----------|----------------------|----|----|-------|-----|-----------|------|------|-------|------|------|-----------|----------------------|----|----|-------|-----|-----------|------|------|-------|------|------|-----------|----------------------|----|----|-------|-----|-----------|------|------|-------|------|------|-----------|----------------------|----|----|--|--|--|--|--|--|--|--|--|--|--|--|------|--|--|--|--|--|--|--|--|--|--|--|--|--|--|--|--|--|--|--|--|--|--|--|--|--|--|--|--|--|------|--|--|--|--|--|--|--|--|--|--|--|--|--|--|--|--|--|--|--|--|--|--|--|--|--|--|--|--|--|
| GENE  | CHR | DNA_LOC   | REF. | ALT. | Amino | AA.R | AA.L | SCN Index | SCN Index Prediction | LT | NT | GENE  | CHR | DNA_LOC   | REF. | ALT. | Amino | AA.R | AA.L | SCN Index | SCN Index Prediction | LT | NT | GENE  | CHR | DNA_LOC   | REF. | ALT. | Amino | AA.R | AA.L | SCN Index | SCN Index Prediction | LT | NT | GENE  | CHR | DNA_LOC   | REF. | ALT. | Amino | AA.R | AA.L | SCN Index | SCN Index Prediction | LT | NT |  |  |  |  |  |  |  |  |  |  |  |  |      |  |  |  |  |  |  |  |  |  |  |  |  |  |  |  |  |  |  |  |  |  |  |  |  |  |  |  |  |  |      |  |  |  |  |  |  |  |  |  |  |  |  |  |  |  |  |  |  |  |  |  |  |  |  |  |  |  |  |  |
| SCN2A | 2   | 166848642 | T    | C    | 1715  | I    | F    | 0.665     | Likely Benign        |    |    | SCN2A | 2   | 166245444 | A    | T    | 1710  | I    | F    | 0.388     | Likely Benign        |    |    | SCN2A | 12  | 122020395 | G    | A    | 1709  | G    | S    | 0.815     | Likely Benign        |    |    | SCN2A | 12  | 122020395 | G    | A    | 1709  | G    | S    | 0.815     | Likely Benign        |    |    |  |  |  |  |  |  |  |  |  |  |  |  |      |  |  |  |  |  |  |  |  |  |  |  |  |  |  |  |  |  |  |  |  |  |  |  |  |  |  |  |  |  |      |  |  |  |  |  |  |  |  |  |  |  |  |  |  |  |  |  |  |  |  |  |  |  |  |  |  |  |  |  |
| SCN2A | 2   | 166848642 | T    | C    | 1715  | I    | V    | 0.533     | Likely Benign        |    |    | SCN2A | 2   | 166245444 | A    | T    | 1710  | I    | F    | 0.972     | Likely Pathogenic    |    |    | SCN2A | 12  | 122020395 | G    | A    | 1709  | G    | R    | 0.933     | Likely Pathogenic    |    |    | SCN2A | 12  | 122020395 | G    | A    | 1709  | G    | R    | 0.933     | Likely Pathogenic    |    |    |  |  |  |  |  |  |  |  |  |  |  |  |      |  |  |  |  |  |  |  |  |  |  |  |  |  |  |  |  |  |  |  |  |  |  |  |  |  |  |  |  |  |      |  |  |  |  |  |  |  |  |  |  |  |  |  |  |  |  |  |  |  |  |  |  |  |  |  |  |  |  |  |
| SCN2A | 2   | 166848642 | T    | C    | 1715  | I    | S    | 0.946     | Likely Pathogenic    |    |    | SCN2A | 2   | 166245444 | A    | T    | 1710  | I    | N    | 0.985     | Likely Pathogenic    |    |    | SCN2A | 12  | 122020395 | G    | A    | 1709  | G    | S    | 0.815     | Likely Benign        |    |    | SCN2A | 12  | 122020395 | G    | A    | 1709  | G    | S    | 0.815     | Likely Benign        |    |    |  |  |  |  |  |  |  |  |  |  |  |  |      |  |  |  |  |  |  |  |  |  |  |  |  |  |  |  |  |  |  |  |  |  |  |  |  |  |  |  |  |  |      |  |  |  |  |  |  |  |  |  |  |  |  |  |  |  |  |  |  |  |  |  |  |  |  |  |  |  |  |  |
| SCN2A | 2   | 166848641 | A    | T    | 1715  | I    | S    | 0.946     | Likely Pathogenic    |    |    | SCN2A | 2   | 166245445 | T    | C    | 1710  | I    | T    | 0.91      | Likely Pathogenic    |    |    | SCN2A | 12  | 122020396 | G    | A    | 1709  | G    | D    | 0.758     | Likely Benign        |    |    | SCN2A | 12  | 122020396 | G    | A    | 1709  | G    | D    | 0.758     | Likely Benign        |    |    |  |  |  |  |  |  |  |  |  |  |  |  |      |  |  |  |  |  |  |  |  |  |  |  |  |  |  |  |  |  |  |  |  |  |  |  |  |  |  |  |  |  |      |  |  |  |  |  |  |  |  |  |  |  |  |  |  |  |  |  |  |  |  |  |  |  |  |  |  |  |  |  |
| SCN2A | 2   | 166848641 | A    | T    | 1715  | I    | N    | 0.937     | Likely Pathogenic    |    |    | SCN2A | 2   | 166245446 | T    | G    | 1710  | I    | M    | 0.46      | Likely Benign        |    |    | SCN2A | 12  | 122020396 | G    | A    | 1709  | G    | V    | 0.968     | Likely Pathogenic    |    |    | SCN2A | 12  | 122020396 | G    | A    | 1709  | G    | V    | 0.968     | Likely Pathogenic    |    |    |  |  |  |  |  |  |  |  |  |  |  |  |      |  |  |  |  |  |  |  |  |  |  |  |  |  |  |  |  |  |  |  |  |  |  |  |  |  |  |  |  |  |      |  |  |  |  |  |  |  |  |  |  |  |  |  |  |  |  |  |  |  |  |  |  |  |  |  |  |  |  |  |
| SCN2A | 2   | 166848640 | G    | C    | 1715  | I    | M    | 0.497     | Likely Benign        |    |    | SCN2A | 2   | 166245447 | A    | C    | 1711  | T    | P    | 0.986     | Likely Pathogenic    |    |    | SCN2A | 12  | 122020398 | G    | A    | 1710  | L    | M    | 0.836     | Likely Pathogenic    |    |    | SCN2A | 12  | 122020398 | G    | A    | 1710  | L    | M    | 0.836     | Likely Pathogenic    |    |    |  |  |  |  |  |  |  |  |  |  |  |  |      |  |  |  |  |  |  |  |  |  |  |  |  |  |  |  |  |  |  |  |  |  |  |  |  |  |  |  |  |  |      |  |  |  |  |  |  |  |  |  |  |  |  |  |  |  |  |  |  |  |  |  |  |  |  |  |  |  |  |  |
| SCN2A | 2   | 166848639 | A    | G    | 1716  | C    | S    | 0.982     | Likely Pathogenic    |    |    | SCN2A | 2   | 166245447 | A    | T    | 1711  | T    | S    | 0.585     | Likely Benign        |    |    | SCN2A | 12  | 122020399 | G    | A    | 1710  | L    | Q    | 0.737     | Likely Benign        |    |    | SCN2A | 12  | 122020399 | G    | A    | 1710  | L    | Q    | 0.737     | Likely Benign        |    |    |  |  |  |  |  |  |  |  |  |  |  |  |      |  |  |  |  |  |  |  |  |  |  |  |  |  |  |  |  |  |  |  |  |  |  |  |  |  |  |  |  |  |      |  |  |  |  |  |  |  |  |  |  |  |  |  |  |  |  |  |  |  |  |  |  |  |  |  |  |  |  |  |
| SCN2A | 2   | 166848638 | A    | G    | 1716  | C    | S    | 0.982     | Likely Pathogenic    |    |    | SCN2A | 2   | 166245448 | A    | T    | 1711  | T    | S    | 0.986     | Likely Pathogenic    |    |    | SCN2A | 12  | 122020400 | G    | A    | 1710  | L    | Q    | 0.737     | Likely Benign        |    |    | SCN2A | 12  | 122020400 | G    | A    | 1710  | L    | Q    | 0.737     | Likely Benign        |    |    |  |  |  |  |  |  |  |  |  |  |  |  |      |  |  |  |  |  |  |  |  |  |  |  |  |  |  |  |  |  |  |  |  |  |  |  |  |  |  |  |  |  |      |  |  |  |  |  |  |  |  |  |  |  |  |  |  |  |  |  |  |  |  |  |  |  |  |  |  |  |  |  |
| SCN2A | 2   | 166848638 | C    | A    | 1716  | C    | S    | 0.901     | Likely Pathogenic    |    |    | SCN2A | 2   | 166245448 | C    | G    | 1711  | T    | R    | 0.986     | Likely Pathogenic    |    |    | SCN2A | 12  | 122020401 | G    | A    | 1711  | L    | M    | 0.832     | Likely Pathogenic    |    |    | SCN2A | 12  | 122020401 | G    | A    | 1711  | L    | M    | 0.832     | Likely Pathogenic    |    |    |  |  |  |  |  |  |  |  |  |  |  |  |      |  |  |  |  |  |  |  |  |  |  |  |  |  |  |  |  |  |  |  |  |  |  |  |  |  |  |  |  |  |      |  |  |  |  |  |  |  |  |  |  |  |  |  |  |  |  |  |  |  |  |  |  |  |  |  |  |  |  |  |
| SCN2A | 2   | 166848638 | C    | A    | 1716  | C    | S    | 0.901     | Likely Pathogenic    |    |    | SCN2A | 2   | 166245449 | A    | T    | 1711  | T    | N    | 0.982     | Likely Pathogenic    |    |    | SCN2A | 12  | 122020402 | G    | A    | 1711  | L    | Q    | 0.737     | Likely Benign        |    |    | SCN2A | 12  | 122020402 | G    | A    | 1711  | L    | Q    | 0.737     | Likely Benign        |    |    |  |  |  |  |  |  |  |  |  |  |  |  |      |  |  |  |  |  |  |  |  |  |  |  |  |  |  |  |  |  |  |  |  |  |  |  |  |  |  |  |  |  |      |  |  |  |  |  |  |  |  |  |  |  |  |  |  |  |  |  |  |  |  |  |  |  |  |  |  |  |  |  |
| SCN2A | 2   | 166848637 | C    | G    | 1716  | C    | W    | 0.977     | Likely Pathogenic    |    |    | SCN2A | 2   | 166245450 | A    | G    | 1712  | T    | A    | 0.995     | Likely Pathogenic    |    |    | SCN2A | 12  | 122020402 | G    | A    | 1711  | L    | Q    | 0.737     | Likely Benign        |    |    | SCN2A | 12  | 122020402 | G    | A    | 1711  | L    | Q    | 0.737     | Likely Benign        |    |    |  |  |  |  |  |  |  |  |  |  |  |  |      |  |  |  |  |  |  |  |  |  |  |  |  |  |  |  |  |  |  |  |  |  |  |  |  |  |  |  |  |  |      |  |  |  |  |  |  |  |  |  |  |  |  |  |  |  |  |  |  |  |  |  |  |  |  |  |  |  |  |  |
| SCN2A | 2   | 166848637 | C    | G    | 1717  | L    | I    | 0.915     | Likely Pathogenic    |    |    | SCN2A | 2   | 166245450 | C    | A    | 1712  | T    | N    | 0.995     | Likely Pathogenic    |    |    | SCN2A | 12  | 122020403 | G    | A    | 1711  | L    | R    | 0.989     | Likely Pathogenic    |    |    | SCN2A | 12  | 122020403 | G    | A    | 1711  | L    | R    | 0.989     | Likely Pathogenic    |    |    |  |  |  |  |  |  |  |  |  |  |  |  |      |  |  |  |  |  |  |  |  |  |  |  |  |  |  |  |  |  |  |  |  |  |  |  |  |  |  |  |  |  |      |  |  |  |  |  |  |  |  |  |  |  |  |  |  |  |  |  |  |  |  |  |  |  |  |  |  |  |  |  |
| SCN2A | 2   | 166848636 | G    | T    | 1717  | L    | I    | 0.957     | Likely Pathogenic    |    |    | SCN2A | 2   | 166245451 | A    | C    | 1712  | T    | S    | 0.979     | Likely Pathogenic    |    |    | SCN2A | 12  | 122020404 | G    | A    | 1712  | L    | M    | 0.650     | Likely Benign        |    |    | SCN2A | 12  | 122020404 | G    | A    | 1712  | L    | M    | 0.650     | Likely Benign        |    |    |  |  |  |  |  |  |  |  |  |  |  |  |      |  |  |  |  |  |  |  |  |  |  |  |  |  |  |  |  |  |  |  |  |  |  |  |  |  |  |  |  |  |      |  |  |  |  |  |  |  |  |  |  |  |  |  |  |  |  |  |  |  |  |  |  |  |  |  |  |  |  |  |
| SCN2A | 2   | 166848635 | A    | G    | 1717  | L    | R    | 0.992     | Likely Pathogenic    |    |    | SCN2A | 2   | 166245451 | C    | T    | 1712  | T    | S    | 0.992     | Likely Pathogenic    |    |    | SCN2A | 12  | 122020404 | G    | A    | 1712  | L    | M    | 0.650     | Likely Benign        |    |    | SCN2A | 12  | 122020404 | G    | A    | 1712  | L    | M    | 0.650     | Likely Benign        |    |    |  |  |  |  |  |  |  |  |  |  |  |  |      |  |  |  |  |  |  |  |  |  |  |  |  |  |  |  |  |  |  |  |  |  |  |  |  |  |  |  |  |  |      |  |  |  |  |  |  |  |  |  |  |  |  |  |  |  |  |  |  |  |  |  |  |  |  |  |  |  |  |  |
| SCN2A | 2   | 166848635 | A    | G    | 1717  | L    | P    | 0.990     | Likely Pathogenic    |    |    | SCN2A | 2   | 166245452 | A    | T    | 1712  | T    | S    | 0.992     | Likely Pathogenic    |    |    | SCN2A | 12  | 122020405 | G    | A    | 1712  | L    | Q    | 0.525     | Likely Benign        |    |    | SCN2A | 12  | 122020405 | G    | A    | 1712  | L    | Q    | 0.525     | Likely Benign        |    |    |  |  |  |  |  |  |  |  |  |  |  |  |      |  |  |  |  |  |  |  |  |  |  |  |  |  |  |  |  |  |  |  |  |  |  |  |  |  |  |  |  |  |      |  |  |  |  |  |  |  |  |  |  |  |  |  |  |  |  |  |  |  |  |  |  |  |  |  |  |  |  |  |
| SCN2A | 2   | 166848635 | A    | T    | 1717  | L    | Q    | 0.989     | Likely Pathogenic    |    |    | SCN2A | 2   | 166245453 | A    | T    | 1713  | T    | S    | 0.827     | Likely Pathogenic    |    |    | SCN2A | 12  | 122020405 | G    | A    | 1713  | P    | A    | 0.758     | Likely Benign        |    |    | SCN2A | 12  | 122020405 | G    | A    | 1713  | P    | A    | 0.758     | Likely Benign        |    |    |  |  |  |  |  |  |  |  |  |  |  |  |      |  |  |  |  |  |  |  |  |  |  |  |  |  |  |  |  |  |  |  |  |  |  |  |  |  |  |  |  |  |      |  |  |  |  |  |  |  |  |  |  |  |  |  |  |  |  |  |  |  |  |  |  |  |  |  |  |  |  |  |
| SCN2A | 2   | 166848635 | A    | T    | 1717  | L    | Q    | 0.989     | Likely Pathogenic    |    |    | SCN2A | 2   | 166245453 | C    | T    | 1713  | T    | S    | 0.992     | Likely Pathogenic    |    |    | SCN2A | 12  | 122020406 | G    | A    | 1713  | P    | A    | 0.758     | Likely Benign        |    |    | SCN2A | 12  | 122020406 | G    | A    | 1713  | P    | A    | 0.758     | Likely Benign        |    |    |  |  |  |  |  |  |  |  |  |  |  |  |      |  |  |  |  |  |  |  |  |  |  |  |  |  |  |  |  |  |  |  |  |  |  |  |  |  |  |  |  |  |      |  |  |  |  |  |  |  |  |  |  |  |  |  |  |  |  |  |  |  |  |  |  |  |  |  |  |  |  |  |
| SCN2A | 2   | 166848633 | A    | T    | 1718  | F    | L    | 0.993     | Likely Pathogenic    |    |    | SCN2A | 2   | 166245453 | T    | G    | 1713  | S    | A    | 0.91      | Likely Pathogenic    |    |    | SCN2A | 12  | 122020405 | G    | A    | 1712  | L    | R    | 0.883     | Likely Pathogenic    |    |    | SCN2A | 12  | 122020405 | G    | A    | 1712  | L    | R    | 0.883     | Likely Pathogenic    |    |    |  |  |  |  |  |  |  |  |  |  |  |  |      |  |  |  |  |  |  |  |  |  |  |  |  |  |  |  |  |  |  |  |  |  |  |  |  |  |  |  |  |  |      |  |  |  |  |  |  |  |  |  |  |  |  |  |  |  |  |  |  |  |  |  |  |  |  |  |  |  |  |  |
| SCN2A | 2   | 166848633 | A    | T    | 1718  | F    | L    | 0.993     | Likely Pathogenic    |    |    | SCN2A | 2   | 166245454 | C    | T    | 1713  | S    | Y    | 0.971     | Likely Pathogenic    |    |    | SCN2A | 12  | 122020407 | G    | A    | 1713  | P    | T    | 0.980     | Likely Pathogenic    |    |    | SCN2A | 12  | 122020407 | G    | A    | 1713  | P    | T    | 0.980     | Likely Pathogenic    |    |    |  |  |  |  |  |  |  |  |  |  |  |  |      |  |  |  |  |  |  |  |  |  |  |  |  |  |  |  |  |  |  |  |  |  |  |  |  |  |  |  |  |  |      |  |  |  |  |  |  |  |  |  |  |  |  |  |  |  |  |  |  |  |  |  |  |  |  |  |  |  |  |  |
| SCN2A | 2   | 166848632 | A    | T    | 1718  | F    | L    | 0.993     | Likely Pathogenic    |    |    | SCN2A | 2   | 166245454 | C    | T    | 1713  | S    | Y    | 0.971     | Likely Pathogenic    |    |    | SCN2A | 12  | 122020407 | G    | A    | 1713  | P    | T    | 0.980     | Likely Pathogenic    |    |    | SCN2A | 12  | 122020407 | G    | A    | 1713  | P    | T    | 0.980     | Likely Pathogenic    |    |    |  |  |  |  |  |  |  |  |  |  |  |  |      |  |  |  |  |  |  |  |  |  |  |  |  |  |  |  |  |  |  |  |  |  |  |  |  |  |  |  |  |  |      |  |  |  |  |  |  |  |  |  |  |  |  |  |  |  |  |  |  |  |  |  |  |  |  |  |  |  |  |  |
| SCN2A | 2   | 166848632 | A    | G    | 1718  | F    | S    | 0.995     | Likely Pathogenic    |    |    | SCN2A | 2   | 166245454 | C    | T    | 1713  | S    | Y    | 0.971     | Likely Pathogenic    |    |    | SCN2A | 12  | 122020407 | G    | A    | 1713  | P    | T    | 0.980     | Likely Pathogenic    |    |    | SCN2A | 12  | 122020407 | G    | A    | 1713  | P    | T    | 0.980     | Likely Pathogenic    |    |    |  |  |  |  |  |  |  |  |  |  |  |  |      |  |  |  |  |  |  |  |  |  |  |  |  |  |  |  |  |  |  |  |  |  |  |  |  |  |  |  |  |  |      |  |  |  |  |  |  |  |  |  |  |  |  |  |  |  |  |  |  |  |  |  |  |  |  |  |  |  |  |  |
| SCN2A | 2   | 166848632 | A    | G    | 1718  | F    | S    | 0.995     | Likely Pathogenic    |    |    | SCN2A | 2   | 166245454 | C    | T    | 1713  | S    | Y    | 0.971     | Likely Pathogenic    |    |    | SCN2A | 12  | 122020407 | G    | A    | 1713  | P    | T    | 0.980     | Likely Pathogenic    |    |    | SCN2A | 12  | 122020407 | G    | A    | 1713  | P    | T    | 0.980     | Likely Pathogenic    |    |    |  |  |  |  |  |  |  |  |  |  |  |  |      |  |  |  |  |  |  |  |  |  |  |  |  |  |  |  |  |  |  |  |  |  |  |  |  |  |  |  |  |  |      |  |  |  |  |  |  |  |  |  |  |  |  |  |  |  |  |  |  |  |  |  |  |  |  |  |  |  |  |  |
| SCN2A | 2   | 166848631 | G    | C    | 1718  | F    | L    | 0.981     | Likely Pathogenic    |    |    | SCN2A | 2   | 166245456 | G    | C    | 1714  | A    | P    | 0.951     | Likely Pathogenic    |    |    | SCN2A | 12  | 122020408 | G    | A    | 1713  | P    | R    | 0.967     | Likely Pathogenic    |    |    | SCN2A | 12  | 122020408 | G    | A    | 1713  | P    | R    | 0.967     | Likely Pathogenic    |    |    |  |  |  |  |  |  |  |  |  |  |  |  |      |  |  |  |  |  |  |  |  |  |  |  |  |  |  |  |  |  |  |  |  |  |  |  |  |  |  |  |  |  |      |  |  |  |  |  |  |  |  |  |  |  |  |  |  |  |  |  |  |  |  |  |  |  |  |  |  |  |  |  |
| SCN2A | 2   | 166848631 | G    | C    | 1718  | F    | L    | 0.981     | Likely Pathogenic    |    |    | SCN2A | 2   | 166245456 | G    | C    | 1714  | A    | P    | 0.951     | Likely Pathogenic    |    |    | SCN2A | 12  | 122020408 | G    | A    | 1713  | P    | R    | 0.967     | Likely Pathogenic    |    |    | SCN2A | 12  | 122020408 | G    | A    | 1713  | P    | R    | 0.967     | Likely Pathogenic    |    |    |  |  |  |  |  |  |  |  |  |  |  |  |      |  |  |  |  |  |  |  |  |  |  |  |  |  |  |  |  |  |  |  |  |  |  |  |  |  |  |  |  |  |      |  |  |  |  |  |  |  |  |  |  |  |  |  |  |  |  |  |  |  |  |  |  |  |  |  |  |  |  |  |
| SCN2A | 2   | 166848631 | G    | C    | 1718  | F    | L    | 0.981     | Likely Pathogenic    |    |    | SCN2A | 2   | 166245456 | G    | C    | 1714  | A    | P    | 0.951     | Likely Pathogenic    |    |    | SCN2A | 12  | 122020408 | G    | A    | 1713  | P    | R    | 0.967     | Likely Pathogenic    |    |    | SCN2A | 12  | 122020408 | G    | A    | 1713  | P    | R    | 0.967     | Likely Pathogenic    |    |    |  |  |  |  |  |  |  |  |  |  |  |  |      |  |  |  |  |  |  |  |  |  |  |  |  |  |  |  |  |  |  |  |  |  |  |  |  |  |  |  |  |  |      |  |  |  |  |  |  |  |  |  |  |  |  |  |  |  |  |  |  |  |  |  |  |  |  |  |  |  |  |  |
| SCN2A | 2   | 166848630 | G    | T    | 1719  | Q    | K    | 0.857     | Likely Pathogenic    |    |    | SCN2A | 2   | 166245457 | C    | G    | 1714  | A    | G    | 0.41      | Likely Benign        |    |    | SCN2A | 12  | 122020410 | A    | G    | 1714  | I    | V    | 0.857     | Likely Pathogenic    |    |    | SCN2A | 12  | 122020410 | A    | G    | 1714  | I    | V    | 0.857     | Likely Pathogenic    |    |    |  |  |  |  |  |  |  |  |  |  |  |  |      |  |  |  |  |  |  |  |  |  |  |  |  |  |  |  |  |  |  |  |  |  |  |  |  |  |  |  |  |  |      |  |  |  |  |  |  |  |  |  |  |  |  |  |  |  |  |  |  |  |  |  |  |  |  |  |  |  |  |  |
| SCN2A | 2   | 166848629 | A    | T    | 1719  | Q    | R    | 0.877     | Likely Pathogenic    |    |    | SCN2A | 2   | 166245457 | C    | G    | 1714  | A    | G    | 0.41      | Likely Benign        |    |    | SCN2A | 12  | 122020410 | A    | G    | 1714  | I    | V    | 0.857     | Likely Pathogenic    |    |    | SCN2A | 12  | 122020410 | A    | G    | 1714  | I    | V    | 0.857     | Likely Pathogenic    |    |    |  |  |  |  |  |  |  |  |  |  |  |  |      |  |  |  |  |  |  |  |  |  |  |  |  |  |  |  |  |  |  |  |  |  |  |  |  |  |  |  |  |  |      |  |  |  |  |  |  |  |  |  |  |  |  |  |  |  |  |  |  |  |  |  |  |  |  |  |  |  |  |  |
| SCN2A | 2   | 166848629 | A    | T    | 1719  | Q    | R    | 0.877     | Likely Pathogenic    |    |    | SCN2A | 2   | 166245459 | G    | A    | 1715  | G    | S    | 0.992     | Likely Pathogenic    |    |    | SCN2A | 12  | 122020411 | T    | C    | 1714  | I    | N    | 0.777     | Likely Pathogenic    |    |    | SCN2A | 12  | 122020411 | T    | C    | 1714  | I    | N    | 0.777     | Likely Pathogenic    |    |    |  |  |  |  |  |  |  |  |  |  |  |  |      |  |  |  |  |  |  |  |  |  |  |  |  |  |  |  |  |  |  |  |  |  |  |  |  |  |  |  |  |  |      |  |  |  |  |  |  |  |  |  |  |  |  |  |  |  |  |  |  |  |  |  |  |  |  |  |  |  |  |  |
| SCN2A | 2   | 166848629 | T    | G    | 1719  | Q    | P    | 0.867     | Likely Pathogenic    |    |    | SCN2A | 2   | 166245459 | G    | C    | 1715  | G    | R    | 0.998     | Likely Pathogenic    |    |    | SCN2A | 12  | 122020411 | T    | C    | 1714  | I    | N    | 0.777     | Likely Pathogenic    |    |    | SCN2A | 12  | 122020411 | T    | C    | 1714  | I    | N    | 0.777     | Likely Pathogenic    |    |    |  |  |  |  |  |  |  |  |  |  |  |  |      |  |  |  |  |  |  |  |  |  |  |  |  |  |  |  |  |  |  |  |  |  |  |  |  |  |  |  |  |  |      |  |  |  |  |  |  |  |  |  |  |  |  |  |  |  |  |  |  |  |  |  |  |  |  |  |  |  |  |  |
| SCN2A | 2   | 166848628 | T    | G    | 1719  | Q    | P    | 0.867     | Likely Pathogenic    |    |    | SCN2A | 2   | 166245459 | G    | C    | 1715  | G    | R    | 0.998     | Likely Pathogenic    |    |    | SCN2A | 12  | 122020411 | T    | C    | 1714  | I    | N    | 0.777     | Likely Pathogenic    |    |    | SCN2A | 12  | 122020411 | T    | C    | 1714  | I    | N    | 0.777     | Likely Pathogenic    |    |    |  |  |  |  |  |  |  |  |  |  |  |  |      |  |  |  |  |  |  |  |  |  |  |  |  |  |  |  |  |  |  |  |  |  |  |  |  |  |  |  |  |  |      |  |  |  |  |  |  |  |  |  |  |  |  |  |  |  |  |  |  |  |  |  |  |  |  |  |  |  |  |  |
| SCN2A | 2   | 166848628 | T    | G    | 1719  | Q    | H    | 0.921     | Likely Pathogenic    |    |    | SCN2A | 2   | 166245460 | G    | A    | 1715  | G    | D    | 0.994     | Likely Pathogenic    |    |    | SCN2A | 12  | 122020412 | G    | A    | 1714  | I    | M    | 0.810     | Likely Pathogenic    |    |    | SCN2A | 12  | 122020412 | G    | A    | 1714  | I    | M    | 0.810     | Likely Pathogenic    |    |    |  |  |  |  |  |  |  |  |  |  |  |  |      |  |  |  |  |  |  |  |  |  |  |  |  |  |  |  |  |  |  |  |  |  |  |  |  |  |  |  |  |  |      |  |  |  |  |  |  |  |  |  |  |  |  |  |  |  |  |  |  |  |  |  |  |  |  |  |  |  |  |  |
| SCN2A | 2   | 166848627 | A    | T    | 1720  | I    | V    | 0.977     | Likely Pathogenic    |    |    | SCN2A | 2   | 166245460 | G    | A    | 1715  | G    | D    | 0.994     | Likely Pathogenic    |    |    | SCN2A | 12  | 122020412 | G    | A    | 1714  | I    | M    | 0.810     | Likely Pathogenic    |    |    | SCN2A | 12  | 122020412 | G    | A    | 1714  | I    | M    | 0.810     | Likely Pathogenic    |    |    |  |  |  |  |  |  |  |  |  |  |  |  |      |  |  |  |  |  |  |  |  |  |  |  |  |  |  |  |  |  |  |  |  |  |  |  |  |  |  |  |  |  |      |  |  |  |  |  |  |  |  |  |  |  |  |  |  |  |  |  |  |  |  |  |  |  |  |  |  |  |  |  |
| SCN2A | 2   | 166848627 | A    | T    | 1720  | I    | V    | 0.977     | Likely Pathogenic    |    |    | SCN2A | 2   | 166245460 | G    | A    | 1715  | G    | D    | 0.994     | Likely Pathogenic    |    |    | SCN2A | 12  | 122020412 | G    | A    | 1714  | I    | M    | 0.810     | Likely Pathogenic    |    |    | SCN2A | 12  | 122020412 | G    | A    | 1714  | I    | M    | 0.810     | Likely Pathogenic    |    |    |  |  |  |  |  |  |  |  |  |  |  |  |      |  |  |  |  |  |  |  |  |  |  |  |  |  |  |  |  |  |  |  |  |  |  |  |  |  |  |  |  |  |      |  |  |  |  |  |  |  |  |  |  |  |  |  |  |  |  |  |  |  |  |  |  |  |  |  |  |  |  |  |
| SCN2A | 2   | 166848627 | A    | T    | 1720  | I    | V    | 0.977     | Likely Pathogenic    |    |    | SCN2A | 2   | 166245462 | G    | T    | 1715  | G    | V    | 0.998     | Likely Pathogenic    |    |    | SCN2A | 12  | 122020413 | C    | G    | 1715  | L    | V    | 0.717     | Likely Benign        |    |    | SCN2A | 12  | 122020413 | C    | G    | 1715  | L    | V    | 0.717     | Likely Benign        |    |    |  |  |  |  |  |  |  |  |  |  |  |  |      |  |  |  |  |  |  |  |  |  |  |  |  |  |  |  |  |  |  |  |  |  |  |  |  |  |  |  |  |  |      |  |  |  |  |  |  |  |  |  |  |  |  |  |  |  |  |  |  |  |  |  |  |  |  |  |  |  |  |  |
| SCN2A | 2   | 166848627 | A    | T    | 1720  | I    | L    | 0.857     | Likely Pathogenic    |    |    | SCN2A | 2   | 166245462 | G    | T    | 1715  | G    | V    | 0.998     | Likely Pathogenic    |    |    | SCN2A | 12  | 122020413 | C    | G    | 1715  | L</  |      |           |                      |    |    |       |     |           |      |      |       |      |      |           |                      |    |    |  |  |  |  |  |  |  |  |  |  |  |  |      |  |  |  |  |  |  |  |  |  |  |  |  |  |  |  |  |  |  |  |  |  |  |  |  |  |  |  |  |  |      |  |  |  |  |  |  |  |  |  |  |  |  |  |  |  |  |  |  |  |  |  |  |  |  |  |  |  |  |  |

| GENE  | CHR | DNA_LOC   | REF_N | ALT_N | Amino | AA_R | AA_A | SCN Index | SCN Index Prediction | GENE  | CHR | DNA_LOC   | REF_N | ALT_N | Amino | AA_R | AA_A | SCN Index | SCN Index Prediction |
|-------|-----|-----------|-------|-------|-------|------|------|-----------|----------------------|-------|-----|-----------|-------|-------|-------|------|------|-----------|----------------------|
| SCN1A | 2   | 166848558 | G     | T     | 1743  | P    | T    | 0.856     | Likely Benign        | SCN2A | 2   | 166245528 | C     | T     | 1738  | P    | S    | 0.254     | Likely Benign        |
| SCN1A | 2   | 166848558 | G     | A     | 1743  | P    | L    | 0.516     | Likely Benign        | SCN2A | 2   | 166245528 | C     | A     | 1738  | P    | H    | 0.503     | Likely Pathogenic    |
| SCN1A | 2   | 166848557 | G     | T     | 1743  | P    | P    | 0.182     | Likely Benign        | SCN2A | 2   | 166245528 | C     | T     | 1738  | P    | A    | 0.666     | Likely Benign        |
| SCN1A | 2   | 166848557 | G     | T     | 1743  | P    | H    | 0.925     | Likely Pathogenic    | SCN2A | 2   | 166245529 | C     | T     | 1738  | P    | L    | 0.449     | Likely Benign        |
| SCN1A | 2   | 166848557 | G     | T     | 1744  | N    | P    | 0.195     | Likely Benign        | SCN2A | 2   | 166245531 | C     | T     | 1739  | P    | N    | 0.175     | Likely Benign        |
| SCN1A | 2   | 166848557 | G     | T     | 1744  | N    | C    | 0.442     | Likely Benign        | SCN2A | 2   | 166245531 | C     | G     | 1739  | G    | R    | 0.839     | Likely Pathogenic    |
| SCN1A | 2   | 166848555 | T     | G     | 1744  | N    | H    | 0.171     | Likely Benign        | SCN2A | 2   | 166245532 | C     | G     | 1739  | G    | E    | 0.602     | Likely Benign        |
| SCN1A | 2   | 166848555 | T     | G     | 1744  | N    | H    | 0.126     | Likely Benign        | SCN2A | 2   | 166245532 | C     | G     | 1739  | G    | V    | 0.924     | Likely Pathogenic    |
| SCN1A | 2   | 166848554 | T     | C     | 1744  | N    | S    | 0.122     | Likely Benign        | SCN2A | 2   | 166245532 | C     | T     | 1739  | G    | V    | 0.924     | Likely Pathogenic    |
| SCN1A | 2   | 166848554 | T     | C     | 1744  | N    | S    | 0.138     | Likely Benign        | SCN2A | 2   | 166245533 | C     | G     | 1740  | S    | G    | 0.140     | Likely Benign        |
| SCN1A | 2   | 166848553 | A     | C     | 1744  | N    | K    | 0.140     | Likely Benign        | SCN2A | 2   | 166245534 | A     | T     | 1740  | S    | G    | 0.315     | Likely Benign        |
| SCN1A | 2   | 166848553 | A     | T     | 1744  | N    | K    | 0.140     | Likely Benign        | SCN2A | 2   | 166245534 | A     | T     | 1740  | S    | C    | 0.544     | Likely Benign        |
| SCN1A | 2   | 166848552 | T     | G     | 1745  | K    | Q    | 0.197     | Likely Benign        | SCN2A | 2   | 166245535 | C     | G     | 1740  | S    | T    | 0.1       | Likely Benign        |
| SCN1A | 2   | 166848552 | T     | G     | 1745  | K    | Q    | 0.197     | Likely Benign        | SCN2A | 2   | 166245535 | C     | G     | 1740  | S    | R    | 0.1       | Likely Benign        |
| SCN1A | 2   | 166848551 | T     | C     | 1745  | K    | R    | 0.136     | Likely Benign        | SCN2A | 2   | 166245536 | C     | A     | 1740  | S    | R    | 0.535     | Likely Benign        |
| SCN1A | 2   | 166848551 | T     | C     | 1745  | K    | R    | 0.136     | Likely Benign        | SCN2A | 2   | 166245536 | C     | G     | 1740  | S    | R    | 0.534     | Likely Benign        |
| SCN1A | 2   | 166848550 | T     | G     | 1745  | K    | N    | 0.099     | Likely Benign        | SCN2A | 2   | 166245537 | C     | T     | 1741  | S    | Q    | 0.154     | Likely Benign        |
| SCN1A | 2   | 166848550 | T     | G     | 1745  | K    | N    | 0.125     | Likely Benign        | SCN2A | 2   | 166245537 | C     | T     | 1741  | S    | P    | 0.315     | Likely Benign        |
| SCN1A | 2   | 166848549 | C     | T     | 1746  | V    | L    | 0.400     | Likely Benign        | SCN2A | 2   | 166245538 | C     | T     | 1741  | S    | L    | 0.241     | Likely Benign        |
| SCN1A | 2   | 166848549 | C     | T     | 1746  | V    | L    | 0.400     | Likely Benign        | SCN2A | 2   | 166245540 | C     | T     | 1742  | V    | L    | 0.25      | Likely Benign        |
| SCN1A | 2   | 166848548 | A     | G     | 1746  | V    | D    | 0.057     | Likely Benign        | SCN2A | 2   | 166245540 | G     | T     | 1742  | V    | F    | 0.335     | Likely Benign        |
| SCN1A | 2   | 166848548 | A     | G     | 1746  | V    | D    | 0.057     | Likely Benign        | SCN2A | 2   | 166245541 | C     | T     | 1742  | V    | A    | 0.385     | Likely Benign        |
| SCN1A | 2   | 166848546 | T     | A     | 1747  | N    | Y    | 0.703     | Likely Benign        | SCN2A | 2   | 166245541 | C     | T     | 1742  | V    | A    | 0.385     | Likely Benign        |
| SCN1A | 2   | 166848546 | T     | A     | 1747  | N    | D    | 0.319     | Likely Benign        | SCN2A | 2   | 166245541 | C     | T     | 1742  | V    | G    | 0.581     | Likely Benign        |
| SCN1A | 2   | 166848545 | T     | A     | 1747  | N    | H    | 0.197     | Likely Benign        | SCN2A | 2   | 166245543 | A     | G     | 1743  | K    | Q    | 0.347     | Likely Benign        |









| GENE  | CHR | DNA_LOC  | REF | ALT | Amino | AA_R | AA_AL | SCN Index | SCN Index Prediction | GENE  | CHR | DNA_LOC   | REF | ALT | Amino | AA_R | AA_AL | SCN Index | SCN Index Prediction | GENE  | CHR | DNA_LOC  | REF | ALT | Amino | AA_R | AA_AL | SCN Index | SCN Index Prediction | GENE              |
|-------|-----|----------|-----|-----|-------|------|-------|-----------|----------------------|-------|-----|-----------|-----|-----|-------|------|-------|-----------|----------------------|-------|-----|----------|-----|-----|-------|------|-------|-----------|----------------------|-------------------|
| SCN1A | 2   | 16684137 | T   | G   | 1883  | D    | A     | 0.865     | Likely Pathogenic    | SCN1A | 2   | 166245940 | T   | G   | 1875  | L    | R     | 0.978     | Likely Pathogenic    | SCN1A | 12  | 52208993 | G   | T   | C     | 1875 | A     | P         | 0.910                | Likely Pathogenic |
| SCN1A | 2   | 16684142 | C   | A   | 1881  | E    | D     | 0.492     | Likely Benign        | SCN1A | 2   | 166245942 | C   | G   | 1876  | R    | G     | 0.884     | Likely Pathogenic    | SCN1A | 12  | 52208994 | G   | T   | C     | 1875 | A     | S         | 0.398                | Likely Benign     |
| SCN1A | 2   | 16684142 | C   | A   | 1881  | E    | D     | 0.492     | Likely Benign        | SCN1A | 2   | 166245943 | C   | G   | 1877  | R    | P     | 0.972     | Likely Pathogenic    | SCN1A | 12  | 52208994 | A   | T   | C     | 1875 | A     | P         | 0.398                | Likely Benign     |
| SCN1A | 2   | 16684141 | T   | G   | 1882  | M    | L     | 0.240     | Likely Benign        | SCN1A | 2   | 166245943 | C   | G   | 1877  | R    | P     | 0.972     | Likely Pathogenic    | SCN1A | 12  | 52208994 | C   | G   | T     | 1875 | A     | G         | 0.845                | Likely Benign     |
| SCN1A | 2   | 16684141 | T   | G   | 1882  | M    | L     | 0.240     | Likely Benign        | SCN1A | 2   | 166245943 | C   | G   | 1877  | R    | P     | 0.972     | Likely Pathogenic    | SCN1A | 12  | 52208994 | C   | G   | T     | 1875 | A     | G         | 0.845                | Likely Benign     |
| SCN1A | 2   | 16684141 | T   | G   | 1882  | M    | L     | 0.240     | Likely Benign        | SCN1A | 2   | 166245943 | C   | G   | 1877  | R    | P     | 0.972     | Likely Pathogenic    | SCN1A | 12  | 52208994 | C   | G   | T     | 1875 | A     | G         | 0.845                | Likely Benign     |
| SCN1A | 2   | 16684140 | A   | T   | 1882  | M    | K     | 0.935     | Likely Pathogenic    | SCN1A | 2   | 166245944 | C   | G   | 1877  | R    | P     | 0.972     | Likely Pathogenic    | SCN1A | 12  | 52208995 | C   | G   | T     | 1875 | A     | G         | 0.845                | Likely Benign     |
| SCN1A | 2   | 16684140 | A   | T   | 1882  | M    | K     | 0.935     | Likely Pathogenic    | SCN1A | 2   | 166245944 | C   | G   | 1877  | R    | P     | 0.972     | Likely Pathogenic    | SCN1A | 12  | 52208995 | C   | G   | T     | 1875 | A     | G         | 0.845                | Likely Benign     |
| SCN1A | 2   | 16684139 | C   | T   | 1882  | M    | I     | 0.866     | Likely Pathogenic    | SCN1A | 2   | 166245944 | C   | G   | 1877  | R    | P     | 0.972     | Likely Pathogenic    | SCN1A | 12  | 52208995 | C   | G   | T     | 1875 | A     | G         | 0.845                | Likely Benign     |
| SCN1A | 2   | 16684138 | C   | T   | 1882  | M    | I     | 0.866     | Likely Pathogenic    | SCN1A | 2   | 166245944 | C   | G   | 1877  | R    | P     | 0.972     | Likely Pathogenic    | SCN1A | 12  | 52208995 | C   | G   | T     | 1875 | A     | G         | 0.845                | Likely Benign     |
| SCN1A | 2   | 16684138 | C   | T   | 1882  | M    | I     | 0.866     | Likely Pathogenic    | SCN1A | 2   | 166245944 | C   | G   | 1877  | R    | P     | 0.972     | Likely Pathogenic    | SCN1A | 12  | 52208995 | C   | G   | T     | 1875 | A     | G         | 0.845                | Likely Benign     |
| SCN1A | 2   | 16684138 | C   | T   | 1882  | M    | I     | 0.866     | Likely Pathogenic    | SCN1A | 2   | 166245944 | C   | G   | 1877  | R    | P     | 0.972     | Likely Pathogenic    | SCN1A | 12  | 52208995 | C   | G   | T     | 1875 | A     | G         | 0.845                | Likely Benign     |
| SCN1A | 2   | 16684137 | T   | G   | 1883  | D    | V     | 0.960     | Likely Pathogenic    | SCN1A | 2   | 166245944 | C   | G   | 1877  | R    | P     | 0.972     | Likely Pathogenic    | SCN1A | 12  | 52208995 | C   | G   | T     | 1875 | A     | G         | 0.845                | Likely Benign     |
| SCN1A | 2   | 16684137 | T   | G   | 1883  | D    | V     | 0.960     | Likely Pathogenic    | SCN1A | 2   | 166245944 | C   | G   | 1877  | R    | P     | 0.972     | Likely Pathogenic    | SCN1A | 12  | 52208995 | C   | G   | T     | 1875 | A     | G         | 0.845                | Likely Benign     |
| SCN1A | 2   | 16684137 | T   | G   | 1883  | D    | V     | 0.960     | Likely Pathogenic    | SCN1A | 2   | 166245944 | C   | G   | 1877  | R    | P     | 0.972     | Likely Pathogenic    | SCN1A | 12  | 52208995 | C   | G   | T     | 1875 | A     | G         | 0.845                | Likely Benign     |
| SCN1A | 2   | 16684137 | T   | G   | 1883  | D    | V     | 0.960     | Likely Pathogenic    | SCN1A | 2   | 166245944 | C   | G   | 1877  | R    | P     | 0.972     | Likely Pathogenic    | SCN1A | 12  | 52208995 | C   | G   | T     | 1875 | A     | G         | 0.845                |                   |

| GENE  | CHR | DNA_LOC   | REF. | ALT. | Amino | AA.R | AA.L | SCN Index | SCN Index Prediction | GENE  | CHR | DNA_LOC   | REF. | ALT. | Amino | AA.R | AA.L | SCN Index | SCN Index Prediction | GENE  | CHR | DNA_LOC  | REF. | ALT. | Amino | AA.R | AA.L | SCN Index | SCN Index Prediction |
|-------|-----|-----------|------|------|-------|------|------|-----------|----------------------|-------|-----|-----------|------|------|-------|------|------|-----------|----------------------|-------|-----|----------|------|------|-------|------|------|-----------|----------------------|
| SCN2A | 2   | 166880509 | G    | T    | 1909  | T    | N    | 0.973     | Likely Pathogenic    | SCN2A | 2   | 166240028 | A    | C    | 1904  | Q    | H    | 0.517     | Likely Benign        | SCN2A | 12  | 12200983 | G    | A    | 1905  | A    | T    | 0.008     | Likely Benign        |
| SCN2A | 2   | 166880507 | A    | C    | 1910  | L    | V    | 0.865     | Likely Pathogenic    | SCN2A | 2   | 166240028 | A    | T    | 1904  | Q    | H    | 0.516     | Likely Benign        | SCN2A | 12  | 12200983 | G    | A    | 1905  | A    | P    | 0.009     | Likely Benign        |
| SCN2A | 2   | 166880507 | T    | A    | 1910  | L    | V    | 0.865     | Likely Pathogenic    | SCN2A | 2   | 166240029 | G    | C    | 1905  | E    | Q    | 0.914     | Likely Pathogenic    | SCN2A | 12  | 12200984 | A    | C    | 1905  | A    | D    | 0.010     | Likely Benign        |
| SCN2A | 2   | 166880506 | A    | G    | 1910  | L    | S    | 0.958     | Likely Pathogenic    | SCN2A | 2   | 166240030 | G    | C    | 1905  | E    | Q    | 0.914     | Likely Pathogenic    | SCN2A | 12  | 12200984 | A    | C    | 1905  | A    | D    | 0.010     | Likely Benign        |
| SCN2A | 2   | 166880505 | A    | G    | 1910  | L    | S    | 0.958     | Likely Pathogenic    | SCN2A | 2   | 166240030 | A    | G    | 1905  | E    | Q    | 0.964     | Likely Pathogenic    | SCN2A | 12  | 12200984 | C    | T    | 1905  | A    | V    | 0.008     | Likely Benign        |
| SCN2A | 2   | 166880505 | T    | G    | 1910  | L    | F    | 0.934     | Likely Pathogenic    | SCN2A | 2   | 166240030 | A    | T    | 1905  | E    | V    | 0.967     | Likely Pathogenic    | SCN2A | 12  | 12200986 | T    | A    | 1906  | Y    | N    | 0.008     | Likely Benign        |
| SCN2A | 2   | 166880504 | T    | C    | 1911  | K    | E    | 0.477     | Likely Benign        | SCN2A | 2   | 166240031 | G    | T    | 1905  | E    | D    | 0.941     | Likely Pathogenic    | SCN2A | 12  | 12200986 | T    | G    | 1906  | Y    | D    | 0.009     | Likely Benign        |
| SCN2A | 2   | 166880504 | T    | C    | 1911  | K    | E    | 0.477     | Likely Benign        | SCN2A | 2   | 166240031 | G    | T    | 1905  | E    | D    | 0.941     | Likely Pathogenic    | SCN2A | 12  | 12200986 | T    | G    | 1906  | Y    | D    | 0.009     | Likely Benign        |
| SCN2A | 2   | 166880503 | T    | C    | 1911  | K    | E    | 0.477     | Likely Benign        | SCN2A | 2   | 166240031 | G    | T    | 1905  | E    | D    | 0.941     | Likely Pathogenic    | SCN2A | 12  | 12200986 | T    | G    | 1906  | Y    | D    | 0.009     | Likely Benign        |
| SCN2A | 2   | 166880502 | T    | C    | 1911  | K    | E    | 0.477     | Likely Benign        | SCN2A | 2   | 166240031 | G    | T    | 1905  | E    | D    | 0.941     | Likely Pathogenic    | SCN2A | 12  | 12200986 | T    | G    | 1906  | Y    | D    | 0.009     | Likely Benign        |
| SCN2A | 2   | 166880502 | T    | C    | 1911  | K    | E    | 0.477     | Likely Benign        | SCN2A | 2   | 166240031 | G    | T    | 1905  | E    | D    | 0.941     | Likely Pathogenic    | SCN2A | 12  | 12200986 | T    | G    | 1906  | Y    | D    | 0.009     | Likely Benign        |
| SCN2A | 2   | 166880502 | T    | C    | 1911  | K    | E    | 0.477     | Likely Benign        | SCN2A | 2   | 166240031 | G    | T    | 1905  | E    | D    | 0.941     | Likely Pathogenic    | SCN2A | 12  | 12200986 | T    | G    | 1906  | Y    | D    | 0.009     | Likely Benign        |
| SCN2A | 2   | 166880502 | T    | C    | 1911  | K    | E    | 0.477     | Likely Benign        | SCN2A | 2   | 166240031 | G    | T    | 1905  | E    | D    | 0.941     | Likely Pathogenic    | SCN2A | 12  | 12200986 | T    | G    | 1906  | Y    | D    | 0.009     | Likely Benign        |
| SCN2A | 2   | 166880502 | T    | C    | 1911  | K    | E    | 0.477     | Likely Benign        | SCN2A | 2   | 166240031 | G    | T    | 1905  | E    | D    | 0.941     | Likely Pathogenic    | SCN2A | 12  | 12200986 | T    | G    | 1906  | Y    | D    | 0.009     | Likely Benign        |
| SCN2A | 2   | 166880502 | T    | C    | 1911  | K    | E    | 0.477     | Likely Benign        | SCN2A | 2   | 166240031 | G    | T    | 1905  | E    | D    | 0.941     | Likely Pathogenic    | SCN2A | 12  | 12200986 | T    | G    | 1906  | Y    | D    | 0.009     | Likely Benign        |
| SCN2A | 2   | 166880502 | T    | C    | 1911  | K    | E    | 0.477     | Likely Benign        | SCN2A | 2   | 166240031 | G    | T    | 1905  | E    | D    | 0.941     | Likely Pathogenic    | SCN2A | 12  | 12200986 | T    | G    | 1906  | Y    | D    | 0.009     | Likely Benign        |
| SCN2A | 2   | 166880502 | T    | C    | 1911  | K    | E    | 0.477     | Likely Benign        | SCN2A | 2   | 166240031 | G    | T    | 1905  | E    | D    | 0.941     | Likely Pathogenic    | SCN2A | 12  | 12200986 | T    | G    | 1906  | Y    | D    | 0.009     | Likely Benign        |
| SCN2A | 2   | 166880502 | T    | C    | 1911  | K    | E    | 0.477     | Likely Benign        | SCN2A | 2   | 166240031 | G    | T    | 1905  | E    | D    | 0.941     | Likely Pathogenic    | SCN2A | 12  | 12200986 | T    | G    | 1906  | Y    | D    | 0.009     | Likely Benign        |
| SCN2A | 2   | 166880502 | T    | C    | 1911  | K    | E    | 0.477     | Likely Benign        | SCN2A | 2   | 166240031 | G    | T    | 1905  | E    | D    | 0.941     | Likely Pathogenic    | SCN2A | 12  | 12200986 | T    | G    | 1906  | Y    | D    | 0.009     | Likely Benign        |
| SCN2A | 2   | 166880502 | T    | C    | 1911  | K    | E    | 0.477     | Likely Benign        | SCN2A | 2   | 166240031 | G    | T    | 1905  | E    | D    | 0.941     | Likely Pathogenic    | SCN2A | 12  | 12200986 | T    | G    | 1906  | Y    | D    | 0.009     | Likely Benign        |
| SCN2A | 2   | 166880502 | T    | C    | 1911  | K    | E    | 0.477     | Likely Benign        | SCN2A | 2   | 166240031 | G    | T    | 1905  | E    | D    | 0.941     | Likely Pathogenic    | SCN2A | 12  | 12200986 | T    | G    | 1906  | Y    | D    | 0.009     | Likely Benign        |
| SCN2A | 2   | 166880502 | T    | C    | 1911  | K    | E    | 0.477     | Likely Benign        | SCN2A | 2   | 166240031 | G    | T    | 1905  | E    | D    | 0.941     | Likely Pathogenic    | SCN2A | 12  | 12200986 | T    | G    | 1906  | Y    | D    | 0.009     | Likely Benign        |
| SCN2A | 2   | 166880502 | T    | C    | 1911  | K    | E    | 0.477     | Likely Benign        | SCN2A | 2   | 166240031 | G    | T    | 1905  | E    | D    | 0.941     | Likely Pathogenic    | SCN2A | 12  | 12200986 | T    | G    | 1906  | Y    | D    | 0.009     | Likely Benign        |
| SCN2A | 2   | 166880502 | T    | C    | 1911  | K    | E    | 0.477     | Likely Benign        | SCN2A | 2   | 166240031 | G    | T    | 1905  | E    | D    | 0.941     | Likely Pathogenic    | SCN2A | 12  | 12200986 | T    | G    | 1906  | Y    | D    | 0.009     | Likely Benign        |
| SCN2A | 2   | 166880502 | T    | C    | 1911  | K    | E    | 0.477     | Likely Benign        | SCN2A | 2   | 166240031 | G    | T    | 1905  | E    | D    | 0.941     | Likely Pathogenic    | SCN2A | 12  | 12200986 | T    | G    | 1906  | Y    | D    | 0.009     | Likely Benign        |
| SCN2A | 2   | 166880502 | T    | C    | 1911  | K    | E    | 0.477     | Likely Benign        | SCN2A | 2   | 166240031 | G    | T    | 1905  | E    | D    | 0.941     | Likely Pathogenic    | SCN2A | 12  | 12200986 | T    | G    | 1906  | Y    | D    | 0.009     | Likely Benign        |
| SCN2A | 2   | 166880502 | T    | C    | 1911  | K    | E    | 0.477     | Likely Benign        | SCN2A | 2   | 166240031 | G    | T    | 1905  | E    | D    | 0.941     | Likely Pathogenic    | SCN2A | 12  | 12200986 | T    | G    | 1906  | Y    | D    | 0.009     | Likely Benign        |
| SCN2A | 2   | 166880502 | T    | C    | 1911  | K    | E    | 0.477     | Likely Benign        | SCN2A | 2   | 166240031 | G    | T    | 1905  | E    | D    | 0.941     | Likely Pathogenic    | SCN2A | 12  | 12200986 | T    | G    | 1906  | Y    | D    | 0.009     | Likely Benign        |
| SCN2A | 2   | 166880502 | T    | C    | 1911  | K    | E    | 0.477     | Likely Benign        | SCN2A | 2   | 166240031 | G    | T    | 1905  | E    | D    | 0.941     | Likely Pathogenic    | SCN2A | 12  | 12200986 | T    | G    | 1906  | Y    | D    | 0.009     | Likely Benign        |
| SCN2A | 2   | 166880502 | T    | C    | 1911  | K    | E    | 0.477     | Likely Benign        | SCN2A | 2   | 166240031 | G    | T    | 1905  | E    | D    | 0.941     | Likely Pathogenic    | SCN2A | 12  | 12200986 | T    | G    | 1906  | Y    | D    | 0.009     | Likely Benign        |
| SCN2A | 2   | 166880502 | T    | C    | 1911  | K    | E    | 0.477     | Likely Benign        | SCN2A | 2   | 166240031 | G    | T    | 1905  | E    | D    | 0.941     | Likely Pathogenic    | SCN2A | 12  | 12200986 | T    | G    | 1906  | Y    | D    | 0.009     | Likely Benign        |
| SCN2A | 2   | 166880502 | T    | C    | 1911  | K    | E    | 0.477     | Likely Benign        | SCN2A | 2   | 166240031 | G    | T    | 1905  | E    | D    | 0.941     | Likely Pathogenic    | SCN2A | 12  | 12200986 | T    | G    | 1906  | Y    | D    | 0.009     | Likely Benign        |
| SCN2A | 2   | 166880502 | T    | C    | 1911  | K    | E    | 0.477     | Likely Benign        | SCN2A | 2   | 166240031 | G    | T    | 1905  | E    | D    | 0.941     | Likely Pathogenic    | SCN2A | 12  | 12200986 | T    | G    | 1906  | Y    | D    | 0.009     | Likely Benign        |
| SCN2A | 2   | 166880502 | T    | C    | 1911  | K    | E    | 0.477     | Likely Benign        | SCN2A | 2   | 166240031 | G    | T    | 1905  | E    | D    | 0.941     | Likely Pathogenic    | SCN2A | 12  | 12200986 | T    | G    | 1906  | Y    | D    | 0.009     | Likely Benign        |
| SCN2A | 2   | 166880502 | T    | C    | 1911  | K    | E    | 0.477     | Likely Benign        | SCN2A | 2   | 166240031 | G    | T    | 1905  | E    | D    | 0.941     | Likely Pathogenic    | SCN2A | 12  | 12200986 | T    | G    | 1906  | Y    | D    | 0.009     | Likely Benign        |
| SCN2A | 2   | 166880502 | T    | C    | 1911  | K    | E    | 0.477     | Likely Benign        | SCN2A | 2   | 166240031 | G    | T    | 1905  | E    | D    | 0.941     | Likely Pathogenic    | SCN2A | 12  | 12200986 | T    | G    | 1906  | Y    | D    | 0.009     | Likely Benign        |
| SCN2A | 2   | 166880502 | T    | C    | 1911  | K    | E    | 0.477     | Likely Benign        | SCN2A | 2   | 166240031 | G    | T    | 1905  | E    | D    | 0.941     | Likely Pathogenic    | SCN2A | 12  | 12200986 | T    | G    | 1906  | Y    | D    | 0.009     | Likely Benign        |
| SCN2A | 2   | 166880502 | T    | C    | 1911  | K    | E    | 0.477     | Likely Benign        | SCN2A | 2   | 166240031 | G    | T    | 1905  | E    | D    | 0.941     | Likely Pathogenic    | SCN2A | 12  | 12200986 | T    | G    | 1906  | Y    | D    | 0.009     | Likely Benign        |
| SCN2A | 2   | 166880502 | T    | C    | 1911  | K    | E    | 0.477     | Likely Benign        | SCN2A | 2   | 166240031 | G    | T    | 1905  | E    | D    | 0.941     | Likely Pathogenic    | SCN2A | 12  | 12200986 | T    | G    | 1906  | Y    | D    | 0.009     | Likely Benign        |
| SCN2A | 2   | 166880502 | T    | C    | 1911  | K    | E    | 0.477     | Likely Benign        | SCN2A | 2   | 166240031 | G    | T    | 1905  | E    | D    | 0.941     | Likely Pathogenic    | SCN2A | 12  | 12200986 | T    | G    | 1906  | Y    | D    | 0.009     | Likely Benign        |
| SCN2A | 2   | 166880502 | T    | C    | 1911  | K    | E    | 0.477     | Likely Benign        | SCN2A | 2   | 166240031 | G    | T    | 1905  | E    | D    | 0.941     | Likely Pathogenic    | SCN2A | 12  | 12200986 | T    | G    | 1906  | Y    | D    | 0.009     | Likely Benign        |
| SCN2A | 2   | 166880502 | T    | C    | 1911  | K    | E    | 0.477     | Likely Benign        | SCN2A | 2   | 166240031 | G    | T    | 1905  | E    | D    | 0.941     | Likely Pathogenic    | SCN2A | 12  | 12200986 | T    | G    | 1906  | Y    | D    | 0.009     | Likely Benign        |
| SCN2A | 2   | 166880502 | T    | C    | 1911  | K    | E    | 0.477     | Likely Benign        | SCN2A | 2   | 166240031 | G    | T    | 1905  | E    | D    | 0.941     | Likely Pathogenic    | SCN2A | 12  | 12200986 | T    | G    | 1906  | Y    | D    | 0.009     | Likely Benign        |
| SCN2A | 2   | 166880502 | T    | C    | 1911  | K    | E    | 0.477     | Likely Benign        | SCN2A | 2   | 166240031 | G    | T    | 1905  | E    | D    | 0.941     | Likely Pathogenic    | SCN2A | 12  | 12200986 | T    | G    | 1906  | Y    | D    | 0.009     | Likely Benign        |
| SCN2A | 2   | 166880502 | T    | C    | 1911  | K    | E    | 0.477     | Likely Benign        | SCN2A | 2   | 166240031 | G    | T    | 1905  | E    | D    | 0.941     | Likely Pathogenic    | SCN2A | 12  | 12200986 | T    | G    | 1906  | Y    | D    | 0.009     | Likely Benign        |
| SCN2A | 2   | 166880502 | T    | C    | 1911  | K    | E    | 0.477     | Likely Benign        | SCN2A | 2   | 166240031 | G    | T    | 1905  | E    | D    | 0.941     | Likely Pathogenic    | SCN2A | 12  | 12200986 | T    | G    | 1906  | Y    | D    | 0.009     | Likely Benign        |
| SCN2A | 2   | 166880502 | T    | C    | 1911  | K    | E    | 0.477     | Likely Benign        | SCN2A | 2   | 166240031 | G    | T    | 1905  | E    | D    | 0.941     | Likely Pathogenic    | SCN2A | 12  | 12200986 | T    | G    | 1906  | Y    | D    | 0.009     | Likely Benign        |
| SCN2A | 2   | 166880502 | T    | C    | 1911  | K    | E    | 0.477     | Likely Benign        | SCN2A | 2   | 166240031 | G    | T    | 1905  | E    | D    | 0.941     | Likely Pathogenic    | SCN2A | 12  | 12200986 | T    | G    | 1906  | Y    | D    | 0.009     | Likely Benign        |
| SCN2A | 2   | 166880502 | T    | C    | 1911  | K    | E    | 0.477     | Likely Benign        | SCN2A | 2   | 166240031 | G    | T    | 1905  | E    | D    | 0.941     | Likely Pathogenic    | SCN2A | 12  | 12200986 | T    | G    | 1906  | Y    | D    | 0.009     | Likely Benign        |
| SCN2A | 2   | 166880502 | T    | C    | 1911  | K    | E    | 0.477     | Likely Benign        | SCN2A | 2   | 166240031 | G    | T    | 1905  | E    | D    | 0.941     | Likely Pathogenic    | SCN2A | 12  | 12200986 | T    | G    | 1906  | Y    | D    | 0.009     | Likely Benign        |
| SCN2A | 2   | 166880502 | T    | C    | 1911  | K    | E    | 0.477     | Likely Benign        | SCN2A | 2   | 166240031 | G    | T    | 1905  | E    | D    | 0.941     | Likely Pathogenic    | SCN2A | 12  | 12200986 | T    | G    | 1906  | Y    | D    | 0.009     | Likely Benign        |
| SCN2A | 2   | 166880502 | T    | C    | 1911  | K    | E    | 0.477     | Likely Benign        | SCN2A | 2   | 166240031 | G    | T    | 1905  | E    | D</  |           |                      |       |     |          |      |      |       |      |      |           |                      |

[illegible]

| GENE  | CHR | DNA LOC   | REF | ALT | Amino | AA R | AA A  | SCN Index     | SCN Index Prediction | GENE  | CHR       | DNA LOC   | REF | ALT  | Amino | AA R | AA A  | SCN Index     | SCN Index Prediction |
|-------|-----|-----------|-----|-----|-------|------|-------|---------------|----------------------|-------|-----------|-----------|-----|------|-------|------|-------|---------------|----------------------|
| SCN2A | 2   | 166847887 | T   | A   | 1966  | E    | D     | 0.268         | Likely Benign        | SCN2A | 2         | 166241918 | A   | G    | 1961  | E    | G     | 0.383         | Likely Benign        |
| SCN2A | 2   | 166847887 | T   | G   | 1966  | E    | D     | 0.276         | Likely Benign        | SCN2A | 2         | 166241918 | A   | T    | 1961  | E    | V     | 0.436         | Likely Benign        |
| SCN2A | 2   | 166847887 | T   | C   | 1967  | N    | H     | 0.378         | Likely Benign        | SCN2A | 2         | 166241919 | G   | T    | 1961  | E    | D     | 0.145         | Likely Benign        |
| SCN2A | 2   | 166847886 | T   | A   | 1967  | N    | H     | 0.378         | Likely Benign        | SCN2A | 2         | 166241919 | G   | T    | 1961  | E    | D     | 0.145         | Likely Benign        |
| SCN2A | 2   | 166847886 | T   | C   | 1967  | N    | H     | 0.378         | Likely Benign        | SCN2A | 2         | 166242000 | G   | T    | 1962  | K    | E     | 0.335         | Likely Benign        |
| SCN2A | 2   | 166847885 | T   | A   | 1967  | N    | S     | 0.376         | Likely Benign        | SCN2A | 2         | 166242000 | G   | T    | 1962  | K    | E     | 0.335         | Likely Benign        |
| SCN2A | 2   | 166847885 | T   | C   | 1967  | N    | S     | 0.376         | Likely Benign        | SCN2A | 2         | 166242001 | A   | C    | 1962  | K    | T     | 0.545         | Likely Benign        |
| SCN2A | 2   | 166847885 | T   | C   | 1967  | N    | S     | 0.376         | Likely Benign        | SCN2A | 2         | 166242001 | A   | C    | 1962  | K    | T     | 0.545         | Likely Benign        |
| SCN2A | 2   | 166847884 | T   | A   | 1967  | N    | K     | 0.540         | Likely Benign        | SCN2A | 2         | 166242001 | A   | T    | 1962  | K    | I     | 0.619         | Likely Benign        |
| SCN2A | 2   | 166847884 | T   | C   | 1967  | N    | K     | 0.540         | Likely Benign        | SCN2A | 2         | 166242002 | A   | T    | 1962  | K    | I     | 0.619         | Likely Benign        |
| SCN2A | 2   | 166847883 | A   | C   | 1968  | S    | A     | 0.610         | Likely Benign        | SCN2A | 2         | 166242002 | A   | T    | 1962  | K    | N     | 0.553         | Likely Benign        |
| SCN2A | 2   | 166847883 | A   | G   | 1968  | S    | P     | 0.450         | Likely Benign        | SCN2A | 2         | 166242003 | A   | C    | 1963  | T    | P     | 0.386         | Likely Benign        |
| SCN2A | 2   | 166847883 | A   | G   | 1968  | S    | P     | 0.450         | Likely Benign        | SCN2A | 2         | 166242003 | A   | C    | 1963  | T    | P     | 0.386         | Likely Benign        |
| SCN2A | 2   | 166847882 | A   | C   | 1968  | S    | F     | 0.303         | Likely Benign        | SCN2A | 2         | 166242003 | A   | T    | 1963  | T    | S     | 0.135         | Likely Benign        |
| SCN2A | 2   | 166847882 | A   | C   | 1968  | S    | F     | 0.303         | Likely Benign        | SCN2A | 2         | 166242004 | A   | T    | 1963  | T    | N     | 0.27          | Likely Benign        |
| SCN2A | 2   | 166847882 | G   | T   | 1968  | S    | Y     | 0.408         | Likely Benign        | SCN2A | 2         | 166242004 | G   | C    | 1963  | T    | S     | 0.13          | Likely Benign        |
| SCN2A | 2   | 166847882 | G   | T   | 1968  | S    | Y     | 0.408         | Likely Benign        | SCN2A | 2         | 166242004 | G   | C    | 1963  | T    | S     | 0.13          | Likely Benign        |
| SCN2A | 2   | 166847880 | T   | A   | 1969  | I    | F     | 0.170         | Likely Benign        | SCN2A | 2         | 166242004 | C   | T    | 1963  | T    | I     | 0.285         | Likely Benign        |
| SCN2A | 2   | 166847880 | T   | C   | 1969  | N    | V     | 0.139         | Likely Benign        | SCN2A | 2         | 166242006 | G   | T    | 1965  | M    | H     | 0.468         | Likely Benign        |
| SCN2A | 2   | 166847880 | T   | G   | 1969  | I    | L     | 0.162         | Likely Benign        | SCN2A | 2         | 166242006 | G   | T    | 1965  | M    | H     | 0.468         | Likely Benign        |
| SCN2A | 2   | 166847879 | A   | G   | 1969  | I    | T     | 0.124         | Likely Benign        | SCN2A | 2         | 166242007 | A   | C    | 1964  | D    | A     | 0.4           | Likely Benign        |
| SCN2A | 2   | 166847879 | A   | G   | 1969  | I    | N     | 0.198         | Likely Benign        | SCN2A | 2         | 166242007 | A   | G    | 1964  | D    | G     | 0.507         | Likely Benign        |
| SCN2A | 2   | 166847878 | T   | A   | 1969  | M    | M     | 0.170         | Likely Benign        | SCN2A | 2         | 166242007 | A   | T    | 1964  | D    | V     | 0.64          | Likely Benign        |
| SCN2A | 2   | 166847877 | T   | A   | 1970  | T    | S     | 0.107         | Likely Benign        | SCN2A | 2         | 166242008 | T   | A    | 1964  | D    | V     | 0.64          | Likely Benign        |
| SCN2A | 2   | 166847877 | T   | G   | 1970  | T    | P     | 0.121         | Likely Benign        | SCN2A | 2         | 166242008 | G   | T    | 1964  | D    | V     | 0.64          | Likely Benign        |
| SCN2A | 2   | 166847876 | G   | A   | 1970  | T    | I     | 0.296         | Likely Benign        | SCN2A | 2         | 166242009 | A   | G    | 1965  | M    | L     | 0.105         | Likely Benign        |
| SCN2A | 2   | 166847876 | G   | T   | 1970  | T    | K     | 0.175         | Likely Benign        | SCN2A | 2         | 166242009 | A   | G    | 1965  | M    | L     | 0.105         | Likely Benign        |
| SCN2A | 2   | 166847874 | G   | T   | 1971  | K    | 0.804 | Likely Benign | SCN2A                | 2     | 166242010 | A         | G   | 1965 | M     | K    | 0.143 | Likely Benign |                      |
| SCN2A | 2   | 166847874 | C   | T   | 1971  | E    | K     | 0.880         | Likely Pathogenic    | SCN2A | 2         | 166242010 | T   | G    | 1965  | M    | R     | 0.168         | Likely Benign        |
| SCN2A | 2   | 166847873 | T   | A   | 1971  | E    | V     | 0.804         | Likely Pathogenic    | SCN2A | 2         | 166242111 | G   | A    | 1965  | M    | I     | 0.123         | Likely Benign        |
| SCN2A | 2   | 166847873 | T   | C   | 1971  | E    | V     | 0.804         | Likely Pathogenic    | SCN2A | 2         | 166242111 | G   | A    | 1965  | M    | I     | 0.123         | Likely Benign        |
| SCN2A | 2   | 166847873 | T   | G   | 1971  | E    | V     | 0.804         | Likely Pathogenic    | SCN2A | 2         | 166242111 | G   | T    | 1965  | M    | I     | 0.123         | Likely Benign        |
| SCN2A | 2   | 166847872 | A   | C   | 1971  | E    | V     | 0.804         | Likely Pathogenic    | SCN2A | 2         | 166242112 | G   | T    | 1965  | M    | I     | 0.123         | Likely Benign        |
| SCN2A | 2   | 166847872 | T   | G   | 1971  | E    | V     | 0.804         | Likely Pathogenic    | SCN2A | 2         | 166242112 | G   | T    | 1965  | M    | I     | 0.123         | Likely Benign        |
| SCN2A | 2   | 166847872 | T   | G   | 1971  | E    | V     | 0.804         | Likely Pathogenic    | SCN2A | 2         | 166242112 | G   | T    | 1965  | M    | I     | 0.123         | Likely Benign        |
| SCN2A | 2   | 166847872 | T   | G   | 1971  | E    | V     | 0.804         | Likely Pathogenic    | SCN2A | 2         | 166242112 | G   | T    | 1965  | M    | I     | 0.123         | Likely Benign        |
| SCN2A | 2   | 166847872 | T   | G   | 1971  | E    | V     | 0.804         | Likely Pathogenic    | SCN2A | 2         | 166242112 | G   | T    | 1965  | M    | I     | 0.123         | Likely Benign        |
| SCN2A | 2   | 166847872 | T   | G   | 1971  | E    | V     | 0.804         | Likely Pathogenic    | SCN2A | 2         | 166242112 | G   | T    | 1965  | M    | I     | 0.123         | Likely Benign        |
| SCN2A | 2   | 166847872 | T   | G   | 1971  | E    | V     | 0.804         | Likely Pathogenic    | SCN2A | 2         | 166242112 | G   | T    | 1965  | M    | I     | 0.123         | Likely Benign        |
| SCN2A | 2   | 166847872 | T   | G   | 1971  | E    | V     | 0.804         | Likely Pathogenic    | SCN2A | 2         | 166242112 | G   | T    | 1965  | M    | I     | 0.123         | Likely Benign        |
| SCN2A | 2   | 166847872 | T   | G   | 1971  | E    | V     | 0.804         | Likely Pathogenic    | SCN2A | 2         | 166242112 | G   | T    | 1965  | M    | I     | 0.123         | Likely Benign        |
| SCN2A | 2   | 166847872 | T   | G   | 1971  | E    | V     | 0.804         | Likely Pathogenic    | SCN2A | 2         | 166242112 | G   | T    | 1965  | M    | I     | 0.123         | Likely Benign        |
| SCN2A | 2   | 166847872 | T   | G   | 1971  | E    | V     | 0.804         | Likely Pathogenic    | SCN2A | 2         | 166242112 | G   | T    | 1965  | M    | I     | 0.123         | Likely Benign        |
| SCN2A | 2   | 166847872 | T   | G   | 1971  | E    | V     | 0.804         | Likely Pathogenic    | SCN2A | 2         | 166242112 | G   | T    | 1965  | M    | I     | 0.123         | Likely Benign        |
| SCN2A | 2   | 166847872 | T   | G   | 1971  | E    | V     | 0.804         | Likely Pathogenic    | SCN2A | 2         | 166242112 | G   | T    | 1965  | M    | I     | 0.123         | Likely Benign        |
| SCN2A | 2   | 166847872 | T   | G   | 1971  | E    | V     | 0.804         | Likely Pathogenic    | SCN2A | 2         | 166242112 | G   | T    | 1965  | M    | I     | 0.123         | Likely Benign        |
| SCN2A | 2   | 166847872 | T   | G   | 1971  | E    | V     | 0.804         | Likely Pathogenic    | SCN2A | 2         | 166242112 | G   | T    | 1965  | M    | I     | 0.123         | Likely Benign        |
| SCN2A | 2   | 166847872 | T   | G   | 1971  | E    | V     | 0.804         | Likely Pathogenic    | SCN2A | 2         | 166242112 | G   | T    | 1965  | M    | I     | 0.123         | Likely Benign        |
| SCN2A | 2   | 166847872 | T   | G   | 1971  | E    | V     | 0.804         | Likely Pathogenic    | SCN2A | 2         | 166242112 | G   | T    | 1965  | M    | I     | 0.123         | Likely Benign        |
| SCN2A | 2   | 166847872 | T   | G   | 1971  | E    | V     | 0.804         | Likely Pathogenic    | SCN2A | 2         | 166242112 | G   | T    | 1965  | M    | I     | 0.123         | Likely Benign        |
| SCN2A | 2   | 166847872 | T   | G   | 1971  | E    | V     | 0.804         | Likely Pathogenic    | SCN2A | 2         | 166242112 | G   | T    | 1965  | M    | I     | 0.123         | Likely Benign        |
| SCN2A | 2   | 166847872 | T   | G   | 1971  | E    | V     | 0.804         | Likely Pathogenic    | SCN2A | 2         | 166242112 | G   | T    | 1965  | M    | I     | 0.123         | Likely Benign        |
| SCN2A | 2   | 166847872 | T   | G   | 1971  | E    | V     | 0.804         | Likely Pathogenic    | SCN2A | 2         | 166242112 | G   | T    | 1965  | M    | I     | 0.123         | Likely Benign        |
| SCN2A | 2   | 166847872 | T   | G   | 1971  | E    | V     | 0.804         | Likely Pathogenic    | SCN2A | 2         | 166242112 | G   | T    | 1965  | M    | I     | 0.123         | Likely Benign        |
| SCN2A | 2   | 166847872 | T   | G   | 1971  | E    | V     | 0.804         | Likely Pathogenic    | SCN2A | 2         | 166242112 | G   | T    | 1965  | M    | I     | 0.123         | Likely Benign        |
| SCN2A | 2   | 166847872 | T   | G   | 1971  | E    | V     | 0.804         | Likely Pathogenic    | SCN2A | 2         | 166242112 | G   | T    | 1965  | M    | I     | 0.123         | Likely Benign        |
| SCN2A | 2   | 166847872 | T   | G   | 1971  | E    | V     | 0.804         | Likely Pathogenic    | SCN2A | 2         | 166242112 | G   | T    | 1965  | M    | I     | 0.123         | Likely Benign        |
| SCN2A | 2   | 166847872 | T   | G   | 1971  | E    | V     | 0.804         | Likely Pathogenic    | SCN2A | 2         | 166242112 | G   | T    | 1965  | M    | I     | 0.123         | Likely Benign        |
| SCN2A | 2   | 166847872 | T   | G   | 1971  | E    | V     | 0.804         | Likely Pathogenic    | SCN2A | 2         | 166242112 | G   | T    | 1965  | M    | I     | 0.123         | Likely Benign        |
| SCN2A | 2   | 166847872 | T   | G   | 1971  | E    | V     | 0.804         | Likely Pathogenic    | SCN2A | 2         | 166242112 | G   | T    | 1965  | M    | I     | 0.123         | Likely Benign        |
| SCN2A | 2   | 166847872 | T   | G   | 1971  | E    | V     | 0.804         | Likely Pathogenic    | SCN2A | 2         | 166242112 | G   | T    | 1965  | M    | I     | 0.123         | Likely Benign        |
| SCN2A | 2   | 166847872 | T   | G   | 1971  | E    | V     | 0.804         | Likely Pathogenic    | SCN2A | 2         | 166242112 | G   | T    | 1965  | M    | I     | 0.123         | Likely Benign        |
| SCN2A | 2   | 166847872 | T   | G   | 1971  | E    | V     | 0.804         | Likely Pathogenic    | SCN2A | 2         | 166242112 | G   | T    | 1965  | M    | I     | 0.123         | Likely Benign        |
| SCN2A | 2   | 166847872 | T   | G   | 1971  | E    | V     | 0.804         | Likely Pathogenic    | SCN2A | 2         | 166242112 | G   | T    | 1965  | M    | I     | 0.123         | Likely Benign        |
| SCN2A | 2   | 166847872 | T   | G   | 1971  | E    | V     | 0.804         | Likely Pathogenic    | SCN2A | 2         | 166242112 | G   | T    | 1965  | M    | I     | 0.123         | Likely Benign        |
| SCN2A | 2   | 166847872 | T   | G   | 1971  | E    | V     | 0.804         | Likely Pathogenic    | SCN2A | 2         | 166242112 | G   | T    | 1965  | M    | I     | 0.123         | Likely Benign        |
| SCN2A | 2   | 166847872 | T   | G   | 1971  | E    | V     | 0.804         | Likely Pathogenic    | SCN2A | 2         | 166242112 | G   | T    | 1965  | M    | I     | 0.123         | Likely Benign        |
| SCN2A | 2   | 166847872 | T   | G   | 1971  | E    | V     | 0.804         | Likely Pathogenic    | SCN2A | 2         | 166242112 | G   | T    | 1965  | M    | I     | 0.123         | Likely Benign        |
| SCN2A | 2   | 166847872 | T   | G   | 1971  | E    | V     | 0.804         | Likely Pathogenic    | SCN2A | 2         | 166242112 | G   | T    | 1965  | M    | I     | 0.123         | Likely Benign        |
| SCN2A | 2   | 166847872 | T   | G   | 1971  | E    | V     | 0.804         | Likely Pathogenic    | SCN2A | 2         | 166242112 | G   | T    | 1965  | M    | I     | 0.123         | Likely Benign        |
| SCN2A | 2   | 166847872 | T   | G   | 1971  | E    | V     | 0.804         | Likely Pathogenic    | SCN2A | 2         | 166242112 | G   | T    | 1965  | M    | I     | 0.123         | Likely Benign        |
| SCN2A | 2   | 166847872 | T   | G   | 1971  | E    | V     | 0.804         | Likely Pathogenic    | SCN2A | 2         | 166242112 | G   | T    | 1965  | M    | I     | 0.123         | Likely Benign        |
| SCN2A | 2   | 166847872 | T   | G   | 1971  | E    | V     | 0.804         | Likely Pathogenic    | SCN2A | 2         | 166242112 | G   | T    | 1965  | M    | I     | 0.123         | Likely Benign        |
| SCN2A | 2   | 166847872 | T   | G   | 1971  | E    | V     | 0.804         | Likely Pathogenic    | SCN2A | 2         | 166242112 | G   | T    | 1965  | M    | I     | 0.123         | Likely Benign        |
| SCN2A | 2   | 166847872 | T   | G   | 1971  | E    | V     | 0.804         | Likely Pathogenic    | SCN2A | 2         | 166242112 | G   | T    | 1965  | M    | I     | 0.123         | Likely Benign        |
| SCN2A | 2   | 166847872 | T   | G   | 1971  | E    | V     | 0.804         | Likely Pathogenic    | SCN2A | 2         | 166242112 | G   | T    | 1965  | M    | I     | 0.123         | Likely Benign        |
| SCN2A | 2   | 166847872 | T   | G   | 1971  | E    | V     | 0.804         | Likely Pathogenic    | SCN2A | 2         | 166242112 | G   | T    | 1965  | M    | I     | 0.123         | Likely Benign        |
| SCN2A | 2   | 166847872 | T   | G   | 1971  | E    | V     | 0.804         | Likely Pathogenic    | SCN2A |           |           |     |      |       |      |       |               |                      |

| GENE                 |  |  |  |  |  |  |  |  |  | GENE                 |  |  |  |  |  |  |  |  |  | GENE                 |  |  |  |  |  |  |  |  |  |
|----------------------|--|--|--|--|--|--|--|--|--|----------------------|--|--|--|--|--|--|--|--|--|----------------------|--|--|--|--|--|--|--|--|--|
| CHN                  |  |  |  |  |  |  |  |  |  | CHN                  |  |  |  |  |  |  |  |  |  | CHN                  |  |  |  |  |  |  |  |  |  |
| DNA_LOC              |  |  |  |  |  |  |  |  |  | DNA_LOC              |  |  |  |  |  |  |  |  |  | DNA_LOC              |  |  |  |  |  |  |  |  |  |
| REF_N                |  |  |  |  |  |  |  |  |  | REF_N                |  |  |  |  |  |  |  |  |  | REF_N                |  |  |  |  |  |  |  |  |  |
| ALT_N                |  |  |  |  |  |  |  |  |  | ALT_N                |  |  |  |  |  |  |  |  |  | ALT_N                |  |  |  |  |  |  |  |  |  |
| Amino                |  |  |  |  |  |  |  |  |  | Amino                |  |  |  |  |  |  |  |  |  | Amino                |  |  |  |  |  |  |  |  |  |
| AA_R                 |  |  |  |  |  |  |  |  |  | AA_R                 |  |  |  |  |  |  |  |  |  | AA_R                 |  |  |  |  |  |  |  |  |  |
| AA_A                 |  |  |  |  |  |  |  |  |  | AA_A                 |  |  |  |  |  |  |  |  |  | AA_A                 |  |  |  |  |  |  |  |  |  |
| SCN Index            |  |  |  |  |  |  |  |  |  | SCN Index            |  |  |  |  |  |  |  |  |  | SCN Index            |  |  |  |  |  |  |  |  |  |
| SCN Index Prediction |  |  |  |  |  |  |  |  |  | SCN Index Prediction |  |  |  |  |  |  |  |  |  | SCN Index Prediction |  |  |  |  |  |  |  |  |  |
| T                    |  |  |  |  |  |  |  |  |  | T                    |  |  |  |  |  |  |  |  |  | T                    |  |  |  |  |  |  |  |  |  |
| NT                   |  |  |  |  |  |  |  |  |  | NT                   |  |  |  |  |  |  |  |  |  | NT                   |  |  |  |  |  |  |  |  |  |
| Add                  |  |  |  |  |  |  |  |  |  | Add                  |  |  |  |  |  |  |  |  |  | Add                  |  |  |  |  |  |  |  |  |  |
| EF                   |  |  |  |  |  |  |  |  |  | EF                   |  |  |  |  |  |  |  |  |  | EF                   |  |  |  |  |  |  |  |  |  |
| LT                   |  |  |  |  |  |  |  |  |  | LT                   |  |  |  |  |  |  |  |  |  | LT                   |  |  |  |  |  |  |  |  |  |
| Prediction           |  |  |  |  |  |  |  |  |  | Prediction           |  |  |  |  |  |  |  |  |  | Prediction           |  |  |  |  |  |  |  |  |  |
| GENE                 |  |  |  |  |  |  |  |  |  | GENE                 |  |  |  |  |  |  |  |  |  | GENE                 |  |  |  |  |  |  |  |  |  |
| CHN                  |  |  |  |  |  |  |  |  |  | CHN                  |  |  |  |  |  |  |  |  |  | CHN                  |  |  |  |  |  |  |  |  |  |
| DNA_LOC              |  |  |  |  |  |  |  |  |  | DNA_LOC              |  |  |  |  |  |  |  |  |  | DNA_LOC              |  |  |  |  |  |  |  |  |  |
| REF_N                |  |  |  |  |  |  |  |  |  | REF_N                |  |  |  |  |  |  |  |  |  | REF_N                |  |  |  |  |  |  |  |  |  |
| ALT_N                |  |  |  |  |  |  |  |  |  | ALT_N                |  |  |  |  |  |  |  |  |  | ALT_N                |  |  |  |  |  |  |  |  |  |
| Amino                |  |  |  |  |  |  |  |  |  | Amino                |  |  |  |  |  |  |  |  |  | Amino                |  |  |  |  |  |  |  |  |  |
| AA_R                 |  |  |  |  |  |  |  |  |  | AA_R                 |  |  |  |  |  |  |  |  |  | AA_R                 |  |  |  |  |  |  |  |  |  |
| AA_A                 |  |  |  |  |  |  |  |  |  | AA_A                 |  |  |  |  |  |  |  |  |  | AA_A                 |  |  |  |  |  |  |  |  |  |
| SCN Index            |  |  |  |  |  |  |  |  |  | SCN Index            |  |  |  |  |  |  |  |  |  | SCN Index            |  |  |  |  |  |  |  |  |  |
| SCN Index Prediction |  |  |  |  |  |  |  |  |  | SCN Index Prediction |  |  |  |  |  |  |  |  |  | SCN Index Prediction |  |  |  |  |  |  |  |  |  |
| T                    |  |  |  |  |  |  |  |  |  | T                    |  |  |  |  |  |  |  |  |  | T                    |  |  |  |  |  |  |  |  |  |
| NT                   |  |  |  |  |  |  |  |  |  | NT                   |  |  |  |  |  |  |  |  |  | NT                   |  |  |  |  |  |  |  |  |  |
| Add                  |  |  |  |  |  |  |  |  |  | Add                  |  |  |  |  |  |  |  |  |  | Add                  |  |  |  |  |  |  |  |  |  |
| EF                   |  |  |  |  |  |  |  |  |  | EF                   |  |  |  |  |  |  |  |  |  | EF                   |  |  |  |  |  |  |  |  |  |
| LT                   |  |  |  |  |  |  |  |  |  | LT                   |  |  |  |  |  |  |  |  |  | LT                   |  |  |  |  |  |  |  |  |  |
| Prediction           |  |  |  |  |  |  |  |  |  | Prediction           |  |  |  |  |  |  |  |  |  | Prediction           |  |  |  |  |  |  |  |  |  |
| GENE                 |  |  |  |  |  |  |  |  |  | GENE                 |  |  |  |  |  |  |  |  |  | GENE                 |  |  |  |  |  |  |  |  |  |
| CHN                  |  |  |  |  |  |  |  |  |  | CHN                  |  |  |  |  |  |  |  |  |  | CHN                  |  |  |  |  |  |  |  |  |  |
| DNA_LOC              |  |  |  |  |  |  |  |  |  | DNA_LOC              |  |  |  |  |  |  |  |  |  | DNA_LOC              |  |  |  |  |  |  |  |  |  |
| REF_N                |  |  |  |  |  |  |  |  |  | REF_N                |  |  |  |  |  |  |  |  |  | REF_N                |  |  |  |  |  |  |  |  |  |
| ALT_N                |  |  |  |  |  |  |  |  |  | ALT_N                |  |  |  |  |  |  |  |  |  | ALT_N                |  |  |  |  |  |  |  |  |  |
| Amino                |  |  |  |  |  |  |  |  |  | Amino                |  |  |  |  |  |  |  |  |  | Amino                |  |  |  |  |  |  |  |  |  |
| AA_R                 |  |  |  |  |  |  |  |  |  | AA_R                 |  |  |  |  |  |  |  |  |  | AA_R                 |  |  |  |  |  |  |  |  |  |
| AA_A                 |  |  |  |  |  |  |  |  |  | AA_A                 |  |  |  |  |  |  |  |  |  | AA_A                 |  |  |  |  |  |  |  |  |  |
| SCN Index            |  |  |  |  |  |  |  |  |  | SCN Index            |  |  |  |  |  |  |  |  |  | SCN Index            |  |  |  |  |  |  |  |  |  |
| SCN Index Prediction |  |  |  |  |  |  |  |  |  | SCN Index Prediction |  |  |  |  |  |  |  |  |  | SCN Index Prediction |  |  |  |  |  |  |  |  |  |
| T                    |  |  |  |  |  |  |  |  |  | T                    |  |  |  |  |  |  |  |  |  | T                    |  |  |  |  |  |  |  |  |  |
| NT                   |  |  |  |  |  |  |  |  |  | NT                   |  |  |  |  |  |  |  |  |  | NT                   |  |  |  |  |  |  |  |  |  |
| Add                  |  |  |  |  |  |  |  |  |  | Add                  |  |  |  |  |  |  |  |  |  | Add                  |  |  |  |  |  |  |  |  |  |
| EF                   |  |  |  |  |  |  |  |  |  | EF                   |  |  |  |  |  |  |  |  |  | EF                   |  |  |  |  |  |  |  |  |  |
| LT                   |  |  |  |  |  |  |  |  |  | LT                   |  |  |  |  |  |  |  |  |  | LT                   |  |  |  |  |  |  |  |  |  |
| Prediction           |  |  |  |  |  |  |  |  |  | Prediction           |  |  |  |  |  |  |  |  |  | Prediction           |  |  |  |  |  |  |  |  |  |
| GENE                 |  |  |  |  |  |  |  |  |  | GENE                 |  |  |  |  |  |  |  |  |  | GENE                 |  |  |  |  |  |  |  |  |  |
| CHN                  |  |  |  |  |  |  |  |  |  | CHN                  |  |  |  |  |  |  |  |  |  | CHN                  |  |  |  |  |  |  |  |  |  |
| DNA_LOC              |  |  |  |  |  |  |  |  |  | DNA_LOC              |  |  |  |  |  |  |  |  |  | DNA_LOC              |  |  |  |  |  |  |  |  |  |
| REF_N                |  |  |  |  |  |  |  |  |  | REF_N                |  |  |  |  |  |  |  |  |  | REF_N                |  |  |  |  |  |  |  |  |  |
| ALT_N                |  |  |  |  |  |  |  |  |  | ALT_N                |  |  |  |  |  |  |  |  |  | ALT_N                |  |  |  |  |  |  |  |  |  |
| Amino                |  |  |  |  |  |  |  |  |  | Amino                |  |  |  |  |  |  |  |  |  | Amino                |  |  |  |  |  |  |  |  |  |
| AA_R                 |  |  |  |  |  |  |  |  |  | AA_R                 |  |  |  |  |  |  |  |  |  | AA_R                 |  |  |  |  |  |  |  |  |  |
| AA_A                 |  |  |  |  |  |  |  |  |  | AA_A                 |  |  |  |  |  |  |  |  |  | AA_A                 |  |  |  |  |  |  |  |  |  |
| SCN Index            |  |  |  |  |  |  |  |  |  | SCN Index            |  |  |  |  |  |  |  |  |  | SCN Index            |  |  |  |  |  |  |  |  |  |
| SCN Index Prediction |  |  |  |  |  |  |  |  |  | SCN Index Prediction |  |  |  |  |  |  |  |  |  | SCN Index Prediction |  |  |  |  |  |  |  |  |  |
| T                    |  |  |  |  |  |  |  |  |  | T                    |  |  |  |  |  |  |  |  |  | T                    |  |  |  |  |  |  |  |  |  |
| NT                   |  |  |  |  |  |  |  |  |  | NT                   |  |  |  |  |  |  |  |  |  | NT                   |  |  |  |  |  |  |  |  |  |
| Add                  |  |  |  |  |  |  |  |  |  | Add                  |  |  |  |  |  |  |  |  |  | Add                  |  |  |  |  |  |  |  |  |  |
| EF                   |  |  |  |  |  |  |  |  |  | EF                   |  |  |  |  |  |  |  |  |  | EF                   |  |  |  |  |  |  |  |  |  |
| LT                   |  |  |  |  |  |  |  |  |  | LT                   |  |  |  |  |  |  |  |  |  | LT                   |  |  |  |  |  |  |  |  |  |
| Prediction           |  |  |  |  |  |  |  |  |  | Prediction           |  |  |  |  |  |  |  |  |  | Prediction           |  |  |  |  |  |  |  |  |  |
| GENE                 |  |  |  |  |  |  |  |  |  | GENE                 |  |  |  |  |  |  |  |  |  | GENE                 |  |  |  |  |  |  |  |  |  |
| CHN                  |  |  |  |  |  |  |  |  |  | CHN                  |  |  |  |  |  |  |  |  |  | CHN                  |  |  |  |  |  |  |  |  |  |
| DNA_LOC              |  |  |  |  |  |  |  |  |  | DNA_LOC              |  |  |  |  |  |  |  |  |  | DNA_LOC              |  |  |  |  |  |  |  |  |  |
| REF_N                |  |  |  |  |  |  |  |  |  | REF_N                |  |  |  |  |  |  |  |  |  | REF_N                |  |  |  |  |  |  |  |  |  |
| ALT_N                |  |  |  |  |  |  |  |  |  | ALT_N                |  |  |  |  |  |  |  |  |  | ALT_N                |  |  |  |  |  |  |  |  |  |
| Amino                |  |  |  |  |  |  |  |  |  | Amino                |  |  |  |  |  |  |  |  |  | Amino                |  |  |  |  |  |  |  |  |  |
| AA_R                 |  |  |  |  |  |  |  |  |  | AA_R                 |  |  |  |  |  |  |  |  |  | AA_R                 |  |  |  |  |  |  |  |  |  |
| AA_A                 |  |  |  |  |  |  |  |  |  | AA_A                 |  |  |  |  |  |  |  |  |  | AA_A                 |  |  |  |  |  |  |  |  |  |
| SCN Index            |  |  |  |  |  |  |  |  |  | SCN Index            |  |  |  |  |  |  |  |  |  | SCN Index            |  |  |  |  |  |  |  |  |  |
| SCN Index Prediction |  |  |  |  |  |  |  |  |  | SCN Index Prediction |  |  |  |  |  |  |  |  |  | SCN Index Prediction |  |  |  |  |  |  |  |  |  |
| T                    |  |  |  |  |  |  |  |  |  | T                    |  |  |  |  |  |  |  |  |  | T                    |  |  |  |  |  |  |  |  |  |
| NT                   |  |  |  |  |  |  |  |  |  | NT                   |  |  |  |  |  |  |  |  |  | NT                   |  |  |  |  |  |  |  |  |  |
| Add                  |  |  |  |  |  |  |  |  |  | Add                  |  |  |  |  |  |  |  |  |  | Add                  |  |  |  |  |  |  |  |  |  |
| EF                   |  |  |  |  |  |  |  |  |  | EF                   |  |  |  |  |  |  |  |  |  | EF                   |  |  |  |  |  |  |  |  |  |
| LT                   |  |  |  |  |  |  |  |  |  | LT                   |  |  |  |  |  |  |  |  |  | LT                   |  |  |  |  |  |  |  |  |  |
| Prediction           |  |  |  |  |  |  |  |  |  | Prediction           |  |  |  |  |  |  |  |  |  | Prediction           |  |  |  |  |  |  |  |  |  |
| GENE                 |  |  |  |  |  |  |  |  |  | GENE                 |  |  |  |  |  |  |  |  |  | GENE                 |  |  |  |  |  |  |  |  |  |
| CHN                  |  |  |  |  |  |  |  |  |  | CHN                  |  |  |  |  |  |  |  |  |  | CHN                  |  |  |  |  |  |  |  |  |  |
| DNA_LOC              |  |  |  |  |  |  |  |  |  | DNA_LOC              |  |  |  |  |  |  |  |  |  | DNA_LOC              |  |  |  |  |  |  |  |  |  |
| REF_N                |  |  |  |  |  |  |  |  |  | REF_N                |  |  |  |  |  |  |  |  |  | REF_N                |  |  |  |  |  |  |  |  |  |
| ALT_N                |  |  |  |  |  |  |  |  |  | ALT_N                |  |  |  |  |  |  |  |  |  | ALT_N                |  |  |  |  |  |  |  |  |  |
| Amino                |  |  |  |  |  |  |  |  |  | Amino                |  |  |  |  |  |  |  |  |  | Amino                |  |  |  |  |  |  |  |  |  |
| AA_R                 |  |  |  |  |  |  |  |  |  | AA_R                 |  |  |  |  |  |  |  |  |  | AA_R                 |  |  |  |  |  |  |  |  |  |
| AA_A                 |  |  |  |  |  |  |  |  |  | AA_A                 |  |  |  |  |  |  |  |  |  | AA_A                 |  |  |  |  |  |  |  |  |  |
| SCN Index            |  |  |  |  |  |  |  |  |  | SCN Index            |  |  |  |  |  |  |  |  |  | SCN Index            |  |  |  |  |  |  |  |  |  |
| SCN Index Prediction |  |  |  |  |  |  |  |  |  | SCN Index Prediction |  |  |  |  |  |  |  |  |  | SCN Index Prediction |  |  |  |  |  |  |  |  |  |
| T                    |  |  |  |  |  |  |  |  |  | T                    |  |  |  |  |  |  |  |  |  | T                    |  |  |  |  |  |  |  |  |  |
| NT                   |  |  |  |  |  |  |  |  |  | NT                   |  |  |  |  |  |  |  |  |  | NT                   |  |  |  |  |  |  |  |  |  |
| Add                  |  |  |  |  |  |  |  |  |  | Add                  |  |  |  |  |  |  |  |  |  | Add                  |  |  |  |  |  |  |  |  |  |
| EF                   |  |  |  |  |  |  |  |  |  | EF                   |  |  |  |  |  |  |  |  |  | EF                   |  |  |  |  |  |  |  |  |  |
| LT                   |  |  |  |  |  |  |  |  |  | LT                   |  |  |  |  |  |  |  |  |  | LT                   |  |  |  |  |  |  |  |  |  |
| Prediction           |  |  |  |  |  |  |  |  |  | Prediction           |  |  |  |  |  |  |  |  |  | Prediction           |  |  |  |  |  |  |  |  |  |
| GENE                 |  |  |  |  |  |  |  |  |  | GENE                 |  |  |  |  |  |  |  |  |  | GENE                 |  |  |  |  |  |  |  |  |  |
| CHN                  |  |  |  |  |  |  |  |  |  | CHN                  |  |  |  |  |  |  |  |  |  | CHN                  |  |  |  |  |  |  |  |  |  |
| DNA_LOC              |  |  |  |  |  |  |  |  |  | DNA_LOC              |  |  |  |  |  |  |  |  |  | DNA_LOC              |  |  |  |  |  |  |  |  |  |
| REF_N                |  |  |  |  |  |  |  |  |  | REF_N                |  |  |  |  |  |  |  |  |  | REF_N                |  |  |  |  |  |  |  |  |  |
| ALT_N                |  |  |  |  |  |  |  |  |  | ALT_N                |  |  |  |  |  |  |  |  |  | ALT_N                |  |  |  |  |  |  |  |  |  |
| Amino                |  |  |  |  |  |  |  |  |  | Amino                |  |  |  |  |  |  |  |  |  | Amino                |  |  |  |  |  |  |  |  |  |
| AA_R                 |  |  |  |  |  |  |  |  |  | AA_R                 |  |  |  |  |  |  |  |  |  | AA_R                 |  |  |  |  |  |  |  |  |  |
| AA_A                 |  |  |  |  |  |  |  |  |  | AA_A                 |  |  |  |  |  |  |  |  |  | AA_A                 |  |  |  |  |  |  |  |  |  |
| SCN Index            |  |  |  |  |  |  |  |  |  | SCN Index            |  |  |  |  |  |  |  |  |  | SCN Index            |  |  |  |  |  |  |  |  |  |
| SCN Index Prediction |  |  |  |  |  |  |  |  |  | SCN Index Prediction |  |  |  |  |  |  |  |  |  | SCN Index Prediction |  |  |  |  |  |  |  |  |  |
| T                    |  |  |  |  |  |  |  |  |  | T                    |  |  |  |  |  |  |  |  |  | T                    |  |  |  |  |  |  |  |  |  |
| NT                   |  |  |  |  |  |  |  |  |  | NT                   |  |  |  |  |  |  |  |  |  | NT                   |  |  |  |  |  |  |  |  |  |
| Add                  |  |  |  |  |  |  |  |  |  | Add                  |  |  |  |  |  |  |  |  |  | Add                  |  |  |  |  |  |  |  |  |  |
| EF                   |  |  |  |  |  |  |  |  |  | EF                   |  |  |  |  |  |  |  |  |  | EF                   |  |  |  |  |  |  |  |  |  |
| LT                   |  |  |  |  |  |  |  |  |  | LT                   |  |  |  |  |  |  |  |  |  | LT                   |  |  |  |  |  |  |  |  |  |
| Prediction           |  |  |  |  |  |  |  |  |  | Prediction           |  |  |  |  |  |  |  |  |  | Prediction           |  |  |  |  |  |  |  |  |  |
| GENE                 |  |  |  |  |  |  |  |  |  | GENE                 |  |  |  |  |  |  |  |  |  | GENE                 |  |  |  |  |  |  |  |  |  |
| CHN                  |  |  |  |  |  |  |  |  |  | CHN                  |  |  |  |  |  |  |  |  |  | CHN                  |  |  |  |  |  |  |  |  |  |
| DNA_LOC              |  |  |  |  |  |  |  |  |  | DNA_LOC              |  |  |  |  |  |  |  |  |  | DNA_LOC              |  |  |  |  |  |  |  |  |  |
| REF_N                |  |  |  |  |  |  |  |  |  | REF_N                |  |  |  |  |  |  |  |  |  | REF_N                |  |  |  |  |  |  |  |  |  |
| ALT_N                |  |  |  |  |  |  |  |  |  | ALT_N                |  |  |  |  |  |  |  |  |  | ALT_N                |  |  |  |  |  |  |  |  |  |
| Amino                |  |  |  |  |  |  |  |  |  | Amino                |  |  |  |  |  |  |  |  |  | Amino                |  |  |  |  |  |  |  |  |  |
| AA_R                 |  |  |  |  |  |  |  |  |  | AA_R                 |  |  |  |  |  |  |  |  |  | AA_R                 |  |  |  |  |  |  |  |  |  |
| AA_A                 |  |  |  |  |  |  |  |  |  | AA_A                 |  |  |  |  |  |  |  |  |  | AA_A                 |  |  |  |  |  |  |  |  |  |
| SCN Index            |  |  |  |  |  |  |  |  |  | SCN Index            |  |  |  |  |  |  |  |  |  | SCN Index            |  |  |  |  |  |  |  |  |  |
| SCN Index Prediction |  |  |  |  |  |  |  |  |  | SCN Index Prediction |  |  |  |  |  |  |  |  |  | SCN Index Prediction |  |  |  |  |  |  |  |  |  |
| T                    |  |  |  |  |  |  |  |  |  | T                    |  |  |  |  |  |  |  |  |  | T                    |  |  |  |  |  |  |  |  |  |
| NT                   |  |  |  |  |  |  |  |  |  | NT                   |  |  |  |  |  |  |  |  |  | NT                   |  |  |  |  |  |  |  |  |  |
| Add                  |  |  |  |  |  |  |  |  |  | Add                  |  |  |  |  |  |  |  |  |  | Add                  |  |  |  |  |  |  |  |  |  |
| EF                   |  |  |  |  |  |  |  |  |  | EF                   |  |  |  |  |  |  |  |  |  | EF                   |  |  |  |  |  |  |  |  |  |
| LT                   |  |  |  |  |  |  |  |  |  | LT                   |  |  |  |  |  |  |  |  |  | LT                   |  |  |  |  |  |  |  |  |  |
| Prediction           |  |  |  |  |  |  |  |  |  | Prediction           |  |  |  |  |  |  |  |  |  | Prediction           |  |  |  |  |  |  |  |  |  |
| GENE                 |  |  |  |  |  |  |  |  |  | GENE                 |  |  |  |  |  |  |  |  |  | GENE                 |  |  |  |  |  |  |  |  |  |
| CHN                  |  |  |  |  |  |  |  |  |  | CHN                  |  |  |  |  |  |  |  |  |  | CHN                  |  |  |  |  |  |  |  |  |  |
| DNA_LOC              |  |  |  |  |  |  |  |  |  | DNA_LOC              |  |  |  |  |  |  |  |  |  | DNA_LOC              |  |  |  |  |  |  |  |  |  |
| REF_N                |  |  |  |  |  |  |  |  |  | REF_N                |  |  |  |  |  |  |  |  |  | REF_N                |  |  |  |  |  |  |  |  |  |
| ALT_N                |  |  |  |  |  |  |  |  |  | ALT_N                |  |  |  |  |  |  |  |  |  | ALT_N                |  |  |  |  |  |  |  |  |  |
| Amino                |  |  |  |  |  |  |  |  |  | Amino                |  |  |  |  |  |  |  |  |  | Amino                |  |  |  |  |  |  |  |  |  |
| AA_R                 |  |  |  |  |  |  |  |  |  | AA_R                 |  |  |  |  |  |  |  |  |  | AA_R                 |  |  |  |  |  |  |  |  |  |
| AA_A                 |  |  |  |  |  |  |  |  |  | AA_A                 |  |  |  |  |  |  |  |  |  | AA_A                 |  |  |  |  |  |  |  |  |  |
| SCN Index            |  |  |  |  |  |  |  |  |  | SCN Index            |  |  |  |  |  |  |  |  |  | SCN Index            |  |  |  |  |  |  |  |  |  |
| SCN Index Prediction |  |  |  |  |  |  |  |  |  | SCN Index Prediction |  |  |  |  |  |  |  |  |  | SCN Index Prediction |  |  |  |  |  |  |  |  |  |
| T                    |  |  |  |  |  |  |  |  |  | T                    |  |  |  |  |  |  |  |  |  | T                    |  |  |  |  |  |  |  |  |  |
| NT                   |  |  |  |  |  |  |  |  |  | NT                   |  |  |  |  |  |  |  |  |  | NT                   |  |  |  |  |  |  |  |  |  |
| Add                  |  |  |  |  |  |  |  |  |  | Add                  |  |  |  |  |  |  |  |  |  | Add                  |  |  |  |  |  |  |  |  |  |
| EF                   |  |  |  |  |  |  |  |  |  | EF                   |  |  |  |  |  |  |  |  |  | EF                   |  |  |  |  |  |  |  |  |  |
| LT                   |  |  |  |  |  |  |  |  |  | LT                   |  |  |  |  |  |  |  |  |  | LT                   |  |  |  |  |  |  |  |  |  |
| Prediction           |  |  |  |  |  |  |  |  |  | Prediction           |  |  |  |  |  |  |  |  |  | Prediction           |  |  |  |  |  |  |  |  |  |
| GENE                 |  |  |  |  |  |  |  |  |  | GENE                 |  |  |  |  |  |  |  |  |  | GENE                 |  |  |  |  |  |  |  |  |  |
| CHN                  |  |  |  |  |  |  |  |  |  | CHN                  |  |  |  |  |  |  |  |  |  | CHN                  |  |  |  |  |  |  |  |  |  |
| DNA_LOC              |  |  |  |  |  |  |  |  |  | DNA_LOC              |  |  |  |  |  |  |  |  |  | DNA_LOC              |  |  |  |  |  |  |  |  |  |
| REF_N                |  |  |  |  |  |  |  |  |  | REF_N                |  |  |  |  |  |  |  |  |  | REF_N                |  |  |  |  |  |  |  |  |  |
| ALT_N                |  |  |  |  |  |  |  |  |  | ALT_N                |  |  |  |  |  |  |  |  |  | ALT_N                |  |  |  |  |  |  |  |  |  |
| Amino                |  |  |  |  |  |  |  |  |  | Amino                |  |  |  |  |  |  |  |  |  | Amino                |  |  |  |  |  |  |  |  |  |
| AA_R                 |  |  |  |  |  |  |  |  |  | AA_R                 |  |  |  |  |  |  |  |  |  | AA_R                 |  |  |  |  |  |  |  |  |  |
| AA_A                 |  |  |  |  |  |  |  |  |  | AA_A                 |  |  |  |  |  |  |  |  |  | AA_A                 |  |  |  |  |  |  |  |  |  |
| SCN Index            |  |  |  |  |  |  |  |  |  | SCN Index            |  |  |  |  |  |  |  |  |  | SCN Index            |  |  |  |  |  |  |  |  |  |
| SCN Index Prediction |  |  |  |  |  |  |  |  |  | SCN Index Prediction |  |  |  |  |  |  |  |  |  | SCN Index Prediction |  |  |  |  |  |  |  |  |  |
| T                    |  |  |  |  |  |  |  |  |  | T                    |  |  |  |  |  |  |  |  |  | T                    |  |  |  |  |  |  |  |  |  |
| NT                   |  |  |  |  |  |  |  |  |  | NT                   |  |  |  |  |  |  |  |  |  | NT                   |  |  |  |  |  |  |  |  |  |
| Add                  |  |  |  |  |  |  |  |  |  | Add                  |  |  |  |  |  |  |  |  |  | Add                  |  |  |  |  |  |  |  |  |  |
| EF                   |  |  |  |  |  |  |  |  |  | EF                   |  |  |  |  |  |  |  |  |  | EF                   |  |  |  |  |  |  |  |  |  |
| LT                   |  |  |  |  |  |  |  |  |  | LT                   |  |  |  |  |  |  |  |  |  | LT                   |  |  |  |  |  |  |  |  |  |
| Prediction           |  |  |  |  |  |  |  |  |  | Prediction           |  |  |  |  |  |  |  |  |  | Prediction           |  |  |  |  |  |  |  |  |  |
| GENE                 |  |  |  |  |  |  |  |  |  | GENE                 |  |  |  |  |  |  |  |  |  | GENE                 |  |  |  |  |  |  |  |  |  |
| CHN                  |  |  |  |  |  |  |  |  |  | CHN                  |  |  |  |  |  |  |  |  |  | CHN                  |  |  |  |  |  |  |  |  |  |
| DNA_LOC              |  |  |  |  |  |  |  |  |  | DNA_LOC              |  |  |  |  |  |  |  |  |  | DNA_LOC              |  |  |  |  |  |  |  |  |  |
| REF_N                |  |  |  |  |  |  |  |  |  | REF_N                |  |  |  |  |  |  |  |  |  | REF_N                |  |  |  |  |  |  |  |  |  |
| ALT_N                |  |  |  |  |  |  |  |  |  | ALT_N                |  |  |  |  |  |  |  |  |  | ALT_N                |  |  |  |  |  |  |  |  |  |
| Amino                |  |  |  |  |  |  |  |  |  | Amino                |  |  |  |  |  |  |  |  |  | Amino                |  |  |  |  |  |  |  |  |  |
| AA_R                 |  |  |  |  |  |  |  |  |  | AA_R                 |  |  |  |  |  |  |  |  |  | AA_R                 |  |  |  |  |  |  |  |  |  |
| AA_A                 |  |  |  |  |  |  |  |  |  | AA_A                 |  |  |  |  |  |  |  |  |  | AA_A                 |  |  |  |  |  |  |  |  |  |
| SCN Index            |  |  |  |  |  |  |  |  |  | SCN Index            |  |  |  |  |  |  |  |  |  | SCN Index            |  |  |  |  |  |  |  |  |  |
| SCN Index Prediction |  |  |  |  |  |  |  |  |  | SCN Index Prediction |  |  |  |  |  |  |  |  |  | SCN Index Prediction |  |  |  |  |  |  |  |  |  |
| T                    |  |  |  |  |  |  |  |  |  | T                    |  |  |  |  |  |  |  |  |  | T                    |  |  |  |  |  |  |  |  |  |
| NT                   |  |  |  |  |  |  |  |  |  | NT                   |  |  |  |  |  |  |  |  |  | NT                   |  |  |  |  |  |  |  |  |  |
| Add                  |  |  |  |  |  |  |  |  |  | Add                  |  |  |  |  |  |  |  |  |  | Add                  |  |  |  |  |  |  |  |  |  |
| EF                   |  |  |  |  |  |  |  |  |  | EF                   |  |  |  |  |  |  |  |  |  | EF                   |  |  |  |  |  |  |  |  |  |
| LT                   |  |  |  |  |  |  |  |  |  | LT                   |  |  |  |  |  |  |  |  |  | LT                   |  |  |  |  |  |  |  |  |  |
| Prediction           |  |  |  |  |  |  |  |  |  | Prediction           |  |  |  |  |  |  |  |  |  | Prediction           |  |  |  |  |  |  |  |  |  |
| GENE                 |  |  |  |  |  |  |  |  |  | GENE                 |  |  |  |  |  |  |  |  |  | GENE                 |  |  |  |  |  |  |  |  |  |
| CHN                  |  |  |  |  |  |  |  |  |  | CHN                  |  |  |  |  |  |  |  |  |  | CHN                  |  |  |  |  |  |  |  |  |  |
| DNA_LOC              |  |  |  |  |  |  |  |  |  | DNA_LOC              |  |  |  |  |  |  |  |  |  | DNA_LOC              |  |  |  |  |  |  |  |  |  |
| REF_N                |  |  |  |  |  |  |  |  |  | REF_N                |  |  |  |  |  |  |  |  |  | REF_N                |  |  |  |  |  |  |  |  |  |
| ALT_N                |  |  |  |  |  |  |  |  |  | ALT_N                |  |  |  |  |  |  |  |  |  | ALT_N                |  |  |  |  |  |  |  |  |  |
| Amino                |  |  |  |  |  |  |  |  |  | Amino                |  |  |  |  |  |  |  |  |  | Amino                |  |  |  |  |  |  |  |  |  |
| AA_R                 |  |  |  |  |  |  |  |  |  | AA_R                 |  |  |  |  |  |  |  |  |  | AA_R                 |  |  |  |  |  |  |  |  |  |
| AA_A                 |  |  |  |  |  |  |  |  |  | AA_A                 |  |  |  |  |  |  |  |  |  | AA_A                 |  |  |  |  |  |  |  |  |  |
| SCN Index            |  |  |  |  |  |  |  |  |  | SCN Index            |  |  |  |  |  |  |  |  |  | SCN Index            |  |  |  |  |  |  |  |  |  |
| SCN Index Prediction |  |  |  |  |  |  |  |  |  | SCN Index Prediction |  |  |  |  |  |  |  |  |  | SCN Index Prediction |  |  |  |  |  |  |  |  |  |
| T                    |  |  |  |  |  |  |  |  |  | T                    |  |  |  |  |  |  |  |  |  | T                    |  |  |  |  |  |  |  |  |  |
| NT                   |  |  |  |  |  |  |  |  |  | NT                   |  |  |  |  |  |  |  |  |  | NT                   |  |  |  |  |  |  |  |  |  |
| Add                  |  |  |  |  |  |  |  |  |  | Add                  |  |  |  |  |  |  |  |  |  | Add                  |  |  |  |  |  |  |  |  |  |
| EF                   |  |  |  |  |  |  |  |  |  | EF                   |  |  |  |  |  |  |  |  |  | EF                   |  |  |  |  |  |  |  |  |  |
| LT                   |  |  |  |  |  |  |  |  |  | LT                   |  |  |  |  |  |  |  |  |  | LT                   |  |  |  |  |  |  |  |  |  |
| Prediction           |  |  |  |  |  |  |  |  |  | Prediction           |  |  |  |  |  |  |  |  |  | Prediction           |  |  |  |  |  |  |  |  |  |
| GENE                 |  |  |  |  |  |  |  |  |  | GENE                 |  |  |  |  |  |  |  |  |  | GENE                 |  |  |  |  |  |  |  |  |  |
| CHN                  |  |  |  |  |  |  |  |  |  | CHN                  |  |  |  |  |  |  |  |  |  | CHN                  |  |  |  |  |  |  |  |  |  |
| DNA_LOC              |  |  |  |  |  |  |  |  |  | DNA_LOC              |  |  |  |  |  |  |  |  |  | DNA_LOC              |  |  |  |  |  |  |  |  |  |
| REF_N                |  |  |  |  |  |  |  |  |  | REF_N                |  |  |  |  |  |  |  |  |  | REF_N                |  |  |  |  |  |  |  |  |  |
| ALT_N                |  |  |  |  |  |  |  |  |  | ALT_N                |  |  |  |  |  |  |  |  |  | ALT_N                |  |  |  |  |  |  |  |  |  |
| Amino                |  |  |  |  |  |  |  |  |  | Amino                |  |  |  |  |  |  |  |  |  | Amino                |  |  |  |  |  |  |  |  |  |
| AA_R                 |  |  |  |  |  |  |  |  |  | AA_R                 |  |  |  |  |  |  |  |  |  | AA_R                 |  |  |  |  |  |  |  |  |  |
| AA_A                 |  |  |  |  |  |  |  |  |  | AA_A                 |  |  |  |  |  |  |  |  |  | AA_A                 |  |  |  |  |  |  |  |  |  |
| SCN Index            |  |  |  |  |  |  |  |  |  | SCN Index            |  |  |  |  |  |  |  |  |  | SCN Index            |  |  |  |  |  |  |  |  |  |
| SCN Index Prediction |  |  |  |  |  |  |  |  |  | SCN Index Prediction |  |  |  |  |  |  |  |  |  | SCN Index Prediction |  |  |  |  |  |  |  |  |  |
| T                    |  |  |  |  |  |  |  |  |  | T                    |  |  |  |  |  |  |  |  |  | T                    |  |  |  |  |  |  |  |  |  |
| NT                   |  |  |  |  |  |  |  |  |  | NT                   |  |  |  |  |  |  |  |  |  | NT                   |  |  |  |  |  |  |  |  |  |
| Add                  |  |  |  |  |  |  |  |  |  | Add                  |  |  |  |  |  |  |  |  |  | Add                  |  |  |  |  |  |  |  |  |  |
| EF                   |  |  |  |  |  |  |  |  |  | EF                   |  |  |  |  |  |  |  |  |  | EF                   |  |  |  |  |  |  |  |  |  |
| LT                   |  |  |  |  |  |  |  |  |  | LT                   |  |  |  |  |  |  |  |  |  | LT                   |  |  |  |  |  |  |  |  |  |
| Prediction           |  |  |  |  |  |  |  |  |  | Prediction           |  |  |  |  |  |  |  |  |  | Prediction           |  |  |  |  |  |  |  |  |  |
| GENE                 |  |  |  |  |  |  |  |  |  | GENE                 |  |  |  |  |  |  |  |  |  | GENE                 |  |  |  |  |  |  |  |  |  |
| CHN                  |  |  |  |  |  |  |  |  |  | CHN                  |  |  |  |  |  |  |  |  |  | CHN                  |  |  |  |  |  |  |  |  |  |
| DNA_LOC              |  |  |  |  |  |  |  |  |  | DNA_LOC              |  |  |  |  |  |  |  |  |  | DNA_LOC              |  |  |  |  |  |  |  |  |  |
| REF_N                |  |  |  |  |  |  |  |  |  | REF_N                |  |  |  |  |  |  |  |  |  | REF_N                |  |  |  |  |  |  |  |  |  |
| ALT_N                |  |  |  |  |  |  |  |  |  | ALT_N                |  |  |  |  |  |  |  |  |  | ALT_N                |  |  |  |  |  |  |  |  |  |
| Amino                |  |  |  |  |  |  |  |  |  | Amino                |  |  |  |  |  |  |  |  |  | Amino                |  |  |  |  |  |  |  |  |  |
| AA_R                 |  |  |  |  |  |  |  |  |  | AA_R                 |  |  |  |  |  |  |  |  |  | AA_R                 |  |  |  |  |  |  |  |  |  |
| AA_A                 |  |  |  |  |  |  |  |  |  | AA_A                 |  |  |  |  |  |  |  |  |  | AA_A                 |  |  |  |  |  |  |  |  |  |
| SCN Index            |  |  |  |  |  |  |  |  |  | SCN Index            |  |  |  |  |  |  |  |  |  | SCN Index            |  |  |  |  |  |  |  |  |  |
| SCN Index Prediction |  |  |  |  |  |  |  |  |  | SCN Index Prediction |  |  |  |  |  |  |  |  |  | SCN Index Prediction |  |  |  |  |  |  |  |  |  |
| T                    |  |  |  |  |  |  |  |  |  | T                    |  |  |  |  |  |  |  |  |  | T                    |  |  |  |  |  |  |  |  |  |
| NT                   |  |  |  |  |  |  |  |  |  | NT                   |  |  |  |  |  |  |  |  |  | NT                   |  |  |  |  |  |  |  |  |  |
| Add                  |  |  |  |  |  |  |  |  |  | Add                  |  |  |  |  |  |  |  |  |  | Add                  |  |  |  |  |  |  |  |  |  |
| EF                   |  |  |  |  |  |  |  |  |  | EF                   |  |  |  |  |  |  |  |  |  | EF                   |  |  |  |  |  |  |  |  |  |
| LT                   |  |  |  |  |  |  |  |  |  | LT                   |  |  |  |  |  |  |  |  |  | LT                   |  |  |  |  |  |  |  |  |  |
| Prediction           |  |  |  |  |  |  |  |  |  | Prediction           |  |  |  |  |  |  |  |  |  | Prediction           |  |  |  |  |  |  |  |  |  |
| GENE                 |  |  |  |  |  |  |  |  |  | GENE                 |  |  |  |  |  |  |  |  |  | GENE                 |  |  |  |  |  |  |  |  |  |
| CHN                  |  |  |  |  |  |  |  |  |  | CHN                  |  |  |  |  |  |  |  |  |  | CHN                  |  |  |  |  |  |  |  |  |  |
| DNA_LOC              |  |  |  |  |  |  |  |  |  | DNA_LOC              |  |  |  |  |  |  |  |  |  | DNA_LOC              |  |  |  |  |  |  |  |  |  |
| REF_N                |  |  |  |  |  |  |  |  |  | REF_N                |  |  |  |  |  |  |  |  |  | REF_N                |  |  |  |  |  |  |  |  |  |
| ALT_N                |  |  |  |  |  |  |  |  |  | ALT_N                |  |  |  |  |  |  |  |  |  | ALT_N                |  |  |  |  |  |  |  |  |  |
| Amino                |  |  |  |  |  |  |  |  |  | Amino                |  |  |  |  |  |  |  |  |  | Amino                |  |  |  |  |  |  |  |  |  |
| AA_R                 |  |  |  |  |  |  |  |  |  | AA_R                 |  |  |  |  |  |  |  |  |  | AA_R                 |  |  |  |  |  |  |  |  |  |
| AA_A                 |  |  |  |  |  |  |  |  |  | AA_A                 |  |  |  |  |  |  |  |  |  | AA_A                 |  |  |  |  |  |  |  |  |  |
| SCN Index            |  |  |  |  |  |  |  |  |  | SCN Index            |  |  |  |  |  |  |  |  |  | SCN Index            |  |  |  |  |  |  |  |  |  |
| SCN Index Prediction |  |  |  |  |  |  |  |  |  | SCN Index Prediction |  |  |  |  |  |  |  |  |  | SCN Index Prediction |  |  |  |  |  |  |  |  |  |
| T                    |  |  |  |  |  |  |  |  |  | T                    |  |  |  |  |  |  |  |  |  | T                    |  |  |  |  |  |  |  |  |  |
| NT                   |  |  |  |  |  |  |  |  |  | NT                   |  |  |  |  |  |  |  |  |  | NT                   |  |  |  |  |  |  |  |  |  |
| Add                  |  |  |  |  |  |  |  |  |  | Add                  |  |  |  |  |  |  |  |  |  | Add                  |  |  |  |  |  |  |  |  |  |
| EF                   |  |  |  |  |  |  |  |  |  | EF                   |  |  |  |  |  |  |  |  |  | EF                   |  |  |  |  |  |  |  |  |  |
| LT                   |  |  |  |  |  |  |  |  |  | LT                   |  |  |  |  |  |  |  |  |  | LT                   |  |  |  |  |  |  |  |  |  |
| Prediction           |  |  |  |  |  |  |  |  |  | Prediction           |  |  |  |  |  |  |  |  |  | Prediction           |  |  |  |  |  |  |  |  |  |
| GENE                 |  |  |  |  |  |  |  |  |  | GENE                 |  |  |  |  |  |  |  |  |  | GENE                 |  |  |  |  |  |  |  |  |  |
| CHN                  |  |  |  |  |  |  |  |  |  | CHN                  |  |  |  |  |  |  |  |  |  | CHN                  |  |  |  |  |  |  |  |  |  |
| DNA_LOC              |  |  |  |  |  |  |  |  |  | DNA_LOC              |  |  |  |  |  |  |  |  |  | DNA_LOC              |  |  |  |  |  |  |  |  |  |
| REF_N                |  |  |  |  |  |  |  |  |  | REF_N                |  |  |  |  |  |  |  |  |  | REF_N                |  |  |  |  |  |  |  |  |  |
| ALT_N                |  |  |  |  |  |  |  |  |  | ALT_N                |  |  |  |  |  |  |  |  |  | ALT_N                |  |  |  |  |  |  |  |  |  |
| Amino                |  |  |  |  |  |  |  |  |  | Amino                |  |  |  |  |  |  |  |  |  | Amino                |  |  |  |  |  |  |  |  |  |
| AA_R                 |  |  |  |  |  |  |  |  |  | AA_R                 |  |  |  |  |  |  |  |  |  | AA_R                 |  |  |  |  |  |  |  |  |  |
| AA_A                 |  |  |  |  |  |  |  |  |  | AA_A                 |  |  |  |  |  |  |  |  |  | AA_A                 |  |  |  |  |  |  |  |  |  |
| SCN Index            |  |  |  |  |  |  |  |  |  | SCN Index            |  |  |  |  |  |  |  |  |  | SCN Index            |  |  |  |  |  |  |  |  |  |
| SCN Index Prediction |  |  |  |  |  |  |  |  |  | SCN Index Prediction |  |  |  |  |  |  |  |  |  | SCN Index Prediction |  |  |  |  |  |  |  |  |  |
| T                    |  |  |  |  |  |  |  |  |  | T                    |  |  |  |  |  |  |  |  |  | T                    |  |  |  |  |  |  |  |  |  |
| NT                   |  |  |  |  |  |  |  |  |  | NT                   |  |  |  |  |  |  |  |  |  | NT                   |  |  |  |  |  |  |  |  |  |
| Add                  |  |  |  |  |  |  |  |  |  | Add                  |  |  |  |  |  |  |  |  |  | Add                  |  |  |  |  |  |  |  |  |  |
| EF                   |  |  |  |  |  |  |  |  |  | EF                   |  |  |  |  |  |  |  |  |  | EF                   |  |  |  |  |  |  |  |  |  |
| LT                   |  |  |  |  |  |  |  |  |  | LT                   |  |  |  |  |  |  |  |  |  | LT                   |  |  |  |  |  |  |  |  |  |
| Prediction           |  |  |  |  |  |  |  |  |  | Prediction           |  |  |  |  |  |  |  |  |  | Prediction           |  |  |  |  |  |  |  |  |  |
| GENE                 |  |  |  |  |  |  |  |  |  | GENE                 |  |  |  |  |  |  |  |  |  | GENE                 |  |  |  |  |  |  |  |  |  |
| CHN                  |  |  |  |  |  |  |  |  |  | CHN                  |  |  |  |  |  |  |  |  |  | CHN                  |  |  |  |  |  |  |  |  |  |
| DNA_LOC              |  |  |  |  |  |  |  |  |  | DNA_LOC              |  |  |  |  |  |  |  |  |  | DNA_LOC              |  |  |  |  |  |  |  |  |  |
| REF_N                |  |  |  |  |  |  |  |  |  | REF_N                |  |  |  |  |  |  |  |  |  | REF_N                |  |  |  |  |  |  |  |  |  |
| ALT_N                |  |  |  |  |  |  |  |  |  | ALT_N                |  |  |  |  |  |  |  |  |  | ALT_N                |  |  |  |  |  |  |  |  |  |
| Amino                |  |  |  |  |  |  |  |  |  | Amino                |  |  |  |  |  |  |  |  |  | Amino                |  |  |  |  |  |  |  |  |  |
| AA_R                 |  |  |  |  |  |  |  |  |  | AA_R                 |  |  |  |  |  |  |  |  |  | AA_R                 |  |  |  |  |  |  |  |  |  |
| AA_A                 |  |  |  |  |  |  |  |  |  | AA_A                 |  |  |  |  |  |  |  |  |  | AA_A                 |  |  |  |  |  |  |  |  |  |
| SCN Index            |  |  |  |  |  |  |  |  |  | SCN Index            |  |  |  |  |  |  |  |  |  | SCN Index            |  |  |  |  |  |  |  |  |  |
| SCN Index Prediction |  |  |  |  |  |  |  |  |  | SCN Index Prediction |  |  |  |  |  |  |  |  |  | SCN Index Prediction |  |  |  |  |  |  |  |  |  |
| T                    |  |  |  |  |  |  |  |  |  | T                    |  |  |  |  |  |  |  |  |  | T                    |  |  |  |  |  |  |  |  |  |
| NT                   |  |  |  |  |  |  |  |  |  | NT                   |  |  |  |  |  |  |  |  |  | NT                   |  |  |  |  |  |  |  |  |  |
| Add                  |  |  |  |  |  |  |  |  |  | Add                  |  |  |  |  |  |  |  |  |  | Add                  |  |  |  |  |  |  |  |  |  |
| EF                   |  |  |  |  |  |  |  |  |  | EF                   |  |  |  |  |  |  |  |  |  | EF                   |  |  |  |  |  |  |  |  |  |
| LT                   |  |  |  |  |  |  |  |  |  | LT                   |  |  |  |  |  |  |  |  |  | LT                   |  |  |  |  |  |  |  |  |  |
| Prediction           |  |  |  |  |  |  |  |  |  | Prediction           |  |  |  |  |  |  |  |  |  | Prediction           |  |  |  |  |  |  |  |  |  |
| GENE                 |  |  |  |  |  |  |  |  |  | GENE                 |  |  |  |  |  |  |  |  |  | GENE                 |  |  |  |  |  |  |  |  |  |
| CHN                  |  |  |  |  |  |  |  |  |  | CHN                  |  |  |  |  |  |  |  |  |  | CHN                  |  |  |  |  |  |  |  |  |  |
| DNA_LOC              |  |  |  |  |  |  |  |  |  | DNA_LOC              |  |  |  |  |  |  |  |  |  | DNA_LOC              |  |  |  |  |  |  |  |  |  |
| REF_N                |  |  |  |  |  |  |  |  |  | REF_N                |  |  |  |  |  |  |  |  |  | REF_N                |  |  |  |  |  |  |  |  |  |
| ALT_N                |  |  |  |  |  |  |  |  |  | ALT_N                |  |  |  |  |  |  |  |  |  | ALT_N                |  |  |  |  |  |  |  |  |  |
| Amino                |  |  |  |  |  |  |  |  |  | Amino                |  |  |  |  |  |  |  |  |  | Amino                |  |  |  |  |  |  |  |  |  |
| AA_R                 |  |  |  |  |  |  |  |  |  | AA_R                 |  |  |  |  |  |  |  |  |  | AA_R                 |  |  |  |  |  |  |  |  |  |
| AA_A                 |  |  |  |  |  |  |  |  |  | AA_A                 |  |  |  |  |  |  |  |  |  | AA_A                 |  |  |  |  |  |  |  |  |  |
| SCN Index            |  |  |  |  |  |  |  |  |  | SCN Index            |  |  |  |  |  |  |  |  |  | SCN Index            |  |  |  |  |  |  |  |  |  |
| SCN Index Prediction |  |  |  |  |  |  |  |  |  | SCN Index Prediction |  |  |  |  |  |  |  |  |  | SCN Index Prediction |  |  |  |  |  |  |  |  |  |
| T                    |  |  |  |  |  |  |  |  |  | T                    |  |  |  |  |  |  |  |  |  | T                    |  |  |  |  |  |  |  |  |  |
| NT                   |  |  |  |  |  |  |  |  |  | NT                   |  |  |  |  |  |  |  |  |  | NT                   |  |  |  |  |  |  |  |  |  |
| Add                  |  |  |  |  |  |  |  |  |  | Add                  |  |  |  |  |  |  |  |  |  | Add                  |  |  |  |  |  |  |  |  |  |
| EF                   |  |  |  |  |  |  |  |  |  | EF                   |  |  |  |  |  |  |  |  |  | EF                   |  |  |  |  |  |  |  |  |  |
| LT                   |  |  |  |  |  |  |  |  |  | LT                   |  |  |  |  |  |  |  |  |  | LT                   |  |  |  |  |  |  |  |  |  |
| Prediction           |  |  |  |  |  |  |  |  |  | Prediction           |  |  |  |  |  |  |  |  |  | Prediction           |  |  |  |  |  |  |  |  |  |
| GENE                 |  |  |  |  |  |  |  |  |  | GENE                 |  |  |  |  |  |  |  |  |  | GENE                 |  |  |  |  |  |  |  |  |  |
| CHN                  |  |  |  |  |  |  |  |  |  | CHN                  |  |  |  |  |  |  |  |  |  | CHN                  |  |  |  |  |  |  |  |  |  |
| DNA_LOC              |  |  |  |  |  |  |  |  |  | DNA_LOC              |  |  |  |  |  |  |  |  |  | DNA_LOC              |  |  |  |  |  |  |  |  |  |
| REF_N                |  |  |  |  |  |  |  |  |  | REF_N                |  |  |  |  |  |  |  |  |  | REF_N                |  |  |  |  |  |  |  |  |  |
| ALT_N                |  |  |  |  |  |  |  |  |  | ALT_N                |  |  |  |  |  |  |  |  |  | ALT_N                |  |  |  |  |  |  |  |  |  |
| Amino                |  |  |  |  |  |  |  |  |  | Amino                |  |  |  |  |  |  |  |  |  | Amino                |  |  |  |  |  |  |  |  |  |
| AA_R                 |  |  |  |  |  |  |  |  |  | AA_R                 |  |  |  |  |  |  |  |  |  | AA_R                 |  |  |  |  |  |  |  |  |  |
| AA_A                 |  |  |  |  |  |  |  |  |  | AA_A                 |  |  |  |  |  |  |  |  |  | AA_A                 |  |  |  |  |  |  |  |  |  |
| SCN Index            |  |  |  |  |  |  |  |  |  | SCN Index            |  |  |  |  |  |  |  |  |  | SCN Index            |  |  |  |  |  |  |  |  |  |
| SCN Index Prediction |  |  |  |  |  |  |  |  |  | SCN Index Prediction |  |  |  |  |  |  |  |  |  | SCN Index Prediction |  |  |  |  |  |  |  |  |  |
| T                    |  |  |  |  |  |  |  |  |  | T                    |  |  |  |  |  |  |  |  |  | T                    |  |  |  |  |  |  |  |  |  |
| NT                   |  |  |  |  |  |  |  |  |  | NT                   |  |  |  |  |  |  |  |  |  | NT                   |  |  |  |  |  |  |  |  |  |
| Add                  |  |  |  |  |  |  |  |  |  | Add                  |  |  |  |  |  |  |  |  |  | Add                  |  |  |  |  |  |  |  |  |  |
| EF                   |  |  |  |  |  |  |  |  |  | EF                   |  |  |  |  |  |  |  |  |  | EF                   |  |  |  |  |  |  |  |  |  |
| LT                   |  |  |  |  |  |  |  |  |  | LT                   |  |  |  |  |  |  |  |  |  | LT                   |  |  |  |  |  |  |  |  |  |
| Prediction           |  |  |  |  |  |  |  |  |  | Prediction           |  |  |  |  |  |  |  |  |  | Prediction           |  |  |  |  |  |  |  |  |  |
| GENE                 |  |  |  |  |  |  |  |  |  | GENE                 |  |  |  |  |  |  |  |  |  | GENE                 |  |  |  |  |  |  |  |  |  |
| CHN                  |  |  |  |  |  |  |  |  |  | CHN                  |  |  |  |  |  |  |  |  |  | CHN                  |  |  |  |  |  |  |  |  |  |
| DNA_LOC              |  |  |  |  |  |  |  |  |  | DNA_LOC              |  |  |  |  |  |  |  |  |  | DNA_LOC              |  |  |  |  |  |  |  |  |  |
| REF_N                |  |  |  |  |  |  |  |  |  | REF_N                |  |  |  |  |  |  |  |  |  | REF_N                |  |  |  |  |  |  |  |  |  |
| ALT_N                |  |  |  |  |  |  |  |  |  | ALT_N                |  |  |  |  |  |  |  |  |  | ALT_N                |  |  |  |  |  |  |  |  |  |
| Amino                |  |  |  |  |  |  |  |  |  | Amino                |  |  |  |  |  |  |  |  |  | Amino                |  |  |  |  |  |  |  |  |  |
| AA_R                 |  |  |  |  |  |  |  |  |  | AA_R                 |  |  |  |  |  |  |  |  |  | AA_R                 |  |  |  |  |  |  |  |  |  |
| AA_A                 |  |  |  |  |  |  |  |  |  | AA_A                 |  |  |  |  |  |  |  |  |  | AA_A                 |  |  |  |  |  |  |  |  |  |
| SCN Index            |  |  |  |  |  |  |  |  |  | SCN Index            |  |  |  |  |  |  |  |  |  | SCN Index            |  |  |  |  |  |  |  |  |  |
| SCN Index Prediction |  |  |  |  |  |  |  |  |  | SCN Index Prediction |  |  |  |  |  |  |  |  |  | SCN Index Prediction |  |  |  |  |  |  |  |  |  |
| T                    |  |  |  |  |  |  |  |  |  | T                    |  |  |  |  |  |  |  |  |  | T                    |  |  |  |  |  |  |  |  |  |
| NT                   |  |  |  |  |  |  |  |  |  | NT                   |  |  |  |  |  |  |  |  |  | NT                   |  |  |  |  |  |  |  |  |  |
| Add                  |  |  |  |  |  |  |  |  |  | Add                  |  |  |  |  |  |  |  |  |  | Add                  |  |  |  |  |  |  |  |  |  |
| EF                   |  |  |  |  |  |  |  |  |  | EF                   |  |  |  |  |  |  |  |  |  | EF                   |  |  |  |  |  |  |  |  |  |
| LT                   |  |  |  |  |  |  |  |  |  | LT                   |  |  |  |  |  |  |  |  |  | LT                   |  |  |  |  |  |  |  |  |  |
| Prediction           |  |  |  |  |  |  |  |  |  | Prediction           |  |  |  |  |  |  |  |  |  | Prediction           |  |  |  |  |  |  |  |  |  |
| GENE                 |  |  |  |  |  |  |  |  |  | GENE                 |  |  |  |  |  |  |  |  |  | GENE                 |  |  |  |  |  |  |  |  |  |
| CHN                  |  |  |  |  |  |  |  |  |  | CHN                  |  |  |  |  |  |  |  |  |  | CHN                  |  |  |  |  |  |  |  |  |  |
| DNA_LOC              |  |  |  |  |  |  |  |  |  | DNA_LOC              |  |  |  |  |  |  |  |  |  | DNA_LOC              |  |  |  |  |  |  |  |  |  |
| REF_N                |  |  |  |  |  |  |  |  |  | REF_N                |  |  |  |  |  |  |  |  |  | REF_N                |  |  |  |  |  |  |  |  |  |
| ALT_N                |  |  |  |  |  |  |  |  |  | ALT_N                |  |  |  |  |  |  |  |  |  | ALT_N                |  |  |  |  |  |  |  |  |  |
| Amino                |  |  |  |  |  |  |  |  |  | Amino                |  |  |  |  |  |  |  |  |  | Amino                |  |  |  |  |  |  |  |  |  |
| AA_R                 |  |  |  |  |  |  |  |  |  | AA_R                 |  |  |  |  |  |  |  |  |  | AA_R                 |  |  |  |  |  |  |  |  |  |
| AA_A                 |  |  |  |  |  |  |  |  |  | AA_A                 |  |  |  |  |  |  |  |  |  | AA_A                 |  |  |  |  |  |  |  |  |  |
| SCN Index            |  |  |  |  |  |  |  |  |  | SCN Index            |  |  |  |  |  |  |  |  |  | SCN Index            |  |  |  |  |  |  |  |  |  |
| SCN Index Prediction |  |  |  |  |  |  |  |  |  | SCN Index Prediction |  |  |  |  |  |  |  |  |  | SCN Index Prediction |  |  |  |  |  |  |  |  |  |
| T                    |  |  |  |  |  |  |  |  |  | T                    |  |  |  |  |  |  |  |  |  | T                    |  |  |  |  |  |  |  |  |  |
| NT                   |  |  |  |  |  |  |  |  |  | NT                   |  |  |  |  |  |  |  |  |  | NT                   |  |  |  |  |  |  |  |  |  |
| Add                  |  |  |  |  |  |  |  |  |  | Add                  |  |  |  |  |  |  |  |  |  | Add                  |  |  |  |  |  |  |  |  |  |
| EF                   |  |  |  |  |  |  |  |  |  | EF                   |  |  |  |  |  |  |  |  |  | EF                   |  |  |  |  |  |  |  |  |  |
| LT                   |  |  |  |  |  |  |  |  |  | LT                   |  |  |  |  |  |  |  |  |  | LT                   |  |  |  |  |  |  |  |  |  |
| Prediction           |  |  |  |  |  |  |  |  |  | Prediction           |  |  |  |  |  |  |  |  |  | Prediction           |  |  |  |  |  |  |  |  |  |
| GENE                 |  |  |  |  |  |  |  |  |  | GENE                 |  |  |  |  |  |  |  |  |  | GENE                 |  |  |  |  |  |  |  |  |  |
| CHN                  |  |  |  |  |  |  |  |  |  | CHN                  |  |  |  |  |  |  |  |  |  | CHN                  |  |  |  |  |  |  |  |  |  |
| DNA_LOC              |  |  |  |  |  |  |  |  |  | DNA_LOC              |  |  |  |  |  |  |  |  |  | DNA_LOC              |  |  |  |  |  |  |  |  |  |
| REF_N                |  |  |  |  |  |  |  |  |  | REF_N                |  |  |  |  |  |  |  |  |  |                      |  |  |  |  |  |  |  |  |  |
